# Supplementary material for: Characterization of Human Genes Modulated by Porphyromonas gingivalis Highlights the Ribosome, Hypothalamus, and Cholinergic Neurons
Source: Front Immunol. 2021 Jun 14;12:646259. doi: 10.3389/fimmu.2021.646259 (PMC8236716; doi:10.3389/fimmu.2021.646259)
Supplement: Supplementary Table 2 — Gene Ontology enrichment results for arginine and lysine proportions. [file Table_2.csv]

MainTitle	N	ID	all_IDs	AUC	P.Value	aspect	otherNames	adj.P.Val
ribosomal subunit	172	GO:0044391	GO:0044391	0.870474070130436	3.89601654495109E-63	CC		2.65162886049371E-59
structural constituent of ribosome	115	GO:0003735	GO:0003735	0.925319056889466	4.22098821095421E-56	MF		1.43640228818772E-52
protein targeting to ER	98	GO:0045047	GO:0045047	0.893771629709237	1.38814637022963E-41	BP		3.1492413985943E-38
large ribosomal subunit	108	GO:0015934	GO:0015934	0.872442976162156	5.33707652674476E-41	CC		9.08103571025621E-38
establishment of protein localization to endoplasmic reticulum	102	GO:0072599	GO:0072599	0.882330605697578	7.87139927407464E-41	BP		1.07145486918704E-37
cytosolic ribosome	94	GO:0022626	GO:0022626	0.8936082129157	5.992307222102E-40	CC		6.79727382560437E-37
SRP-dependent cotranslational protein targeting to membrane	93	GO:0006614	GO:0006614	0.893862643941653	1.34852597100172E-39	BP		1.31115253694824E-36
cotranslational protein targeting to membrane	96	GO:0006613	GO:0006613	0.880728411887838	2.94317295121665E-38	BP		2.50390438824756E-35
nuclear-transcribed mRNA catabolic process, nonsense-mediated decay	118	GO:0000184	GO:0000184	0.840209518655313	1.56524982198316E-37	BP		1.18367669871304E-34
translational initiation	183	GO:0006413	GO:0006413	0.76166228870851	1.88432193078709E-34	BP		1.2824695060937E-31
protein localization to endoplasmic reticulum	118	GO:0070972	GO:0070972	0.821039369968056	1.21717051140543E-33	BP		7.53096590965941E-31
mitochondrial gene expression	148	GO:0140053	GO:0140053	0.776457061674182	2.28979926732264E-31	BP		1.29869781778316E-28
ribosome biogenesis	200	GO:0042254	GO:0042254	0.737512685062904	3.47224300988486E-31	BP		1.8178527634828E-28
cellular protein complex disassembly	195	GO:0043624	GO:0043624	0.739725773577914	5.34027092945402E-31	BP		2.59613456756172E-28
nucleosome	60	GO:0000786	GO:0000786	0.926477134531103	1.66852249383111E-30	CC		7.15404417877542E-28
mitochondrial translation	125	GO:0032543	GO:0032543	0.796117272852994	1.68182055334127E-30	BP		7.15404417877542E-28
spliceosomal complex	159	GO:0005681	GO:0005681	0.762268684406456	2.2639715321125E-30	CC		9.06387661621041E-28
mitochondrial translational termination	88	GO:0070126	GO:0070126	0.851213093065979	2.68502505671187E-30	BP		1.0152378075545E-27
mitochondrial translational elongation	86	GO:0070125	GO:0070125	0.853344516737418	5.39339602431194E-30	BP		1.87850198858776E-27
rRNA metabolic process	189	GO:0016072	GO:0016072	0.739158730893694	5.5201351413099E-30	BP		1.87850198858776E-27
DNA packaging complex	67	GO:0044815	GO:0044815	0.889659142305004	1.48098577320193E-28	CC		4.79980436781541E-26
protein targeting to membrane	157	GO:0006612	GO:0006612	0.753061782998089	4.40076180274507E-28	BP		1.36143567406741E-25
cytosolic large ribosomal subunit	52	GO:0022625	GO:0022625	0.93523854886084	9.70529512447779E-28	CC		2.87192341813895E-25
nuclear-transcribed mRNA catabolic process	194	GO:0000956	GO:0000956	0.725875479274361	1.30679565370719E-27	BP		3.70585467463798E-25
organellar ribosome	84	GO:0000313	GO:0000313	0.83915314729629	3.43538637367511E-27	CC	mitochondrial ribosome	9.35249586369311E-25
translational termination	100	GO:0006415	GO:0006415	0.804924414992752	3.26938341097227E-26	BP		8.55823980579896E-24
rRNA processing	152	GO:0006364	GO:0006364	0.746200298980913	6.62735520241163E-26	BP		1.67058442620791E-23
DNA packaging	156	GO:0006323	GO:0006323	0.736086309920417	1.50259490873553E-24	BP		3.65237891030501E-22
small ribosomal subunit	66	GO:0015935	GO:0015935	0.859136089216662	3.26000061043477E-24	CC		7.65088419124794E-22
translational elongation	124	GO:0006414	GO:0006414	0.753176068856459	1.18855441295269E-22	BP		2.69643377818534E-20
chromatin assembly or disassembly	140	GO:0006333	GO:0006333	0.736273966913546	2.77820933681827E-22	BP		6.0995137891565E-20
nucleosome organization	127	GO:0034728	GO:0034728	0.739896102198843	5.60267509234441E-21	BP		1.191618958703E-18
chromatin assembly	115	GO:0031497	GO:0031497	0.744694402384214	6.90579559289143E-20	BP		1.42426802440058E-17
microtubule binding	166	GO:0008017	GO:0008017	0.703663833616137	8.00009966943654E-20	MF		1.60143171618191E-17
protein-DNA complex assembly	171	GO:0065004	GO:0065004	0.700035616696199	1.05088996152184E-19	BP		2.04353059374789E-17
condensed chromosome	199	GO:0000793	GO:0000793	0.682096540528609	4.90192612573716E-19	CC		9.2673636699353E-17
catalytic step 2 spliceosome	81	GO:0071013	GO:0071013	0.781228882727113	1.13341070036665E-18	CC		2.084863034242E-16
viral gene expression	191	GO:0019080	GO:0019080	0.683364998130662	1.38365968568264E-18	BP		2.47820732125159E-16
viral transcription	177	GO:0019083	GO:0019083	0.688845238515312	2.57458950707321E-18	BP		4.49298876542057E-16
nucleosome assembly	97	GO:0006334	GO:0006334	0.750461391788151	8.23376358143091E-18	BP		1.40097487338047E-15
chromosome, centromeric region	185	GO:0000775	GO:0000775	0.680361586416301	1.53703013954767E-17	CC		2.55147003164913E-15
organellar large ribosomal subunit	55	GO:0000315	GO:0000315	0.823534269199009	5.39461106139224E-17	CC	mitochondrial large ribosomal subunit	8.74183878186561E-15
protein-DNA complex	141	GO:0032993	GO:0032993	0.697057174530141	3.62664295243449E-16	CC		5.7402167288998E-14
cytosolic small ribosomal subunit	38	GO:0022627	GO:0022627	0.874026429741961	7.5382753594751E-16	CC		1.16603413855881E-13
sister chromatid segregation	157	GO:0000819	GO:0000819	0.682437949953874	1.6938994468615E-15	BP		2.56192880785319E-13
microtubule organizing center part	168	GO:0044450	GO:0044450	0.674503961373717	3.35890010372473E-15	CC		4.96971176216316E-13
motor activity	102	GO:0003774	GO:0003774	0.72318693442168	3.60544138443493E-15	MF		5.22098597073705E-13
U2-type spliceosomal complex	76	GO:0005684	GO:0005684	0.756381728561636	5.72215071553681E-15	CC		8.11353286873823E-13
helicase activity	128	GO:0004386	GO:0004386	0.697559694653849	6.36991775219732E-15	MF		8.84768575948061E-13
RNA 3'-end processing	106	GO:0031123	GO:0031123	0.714271009637873	1.32963507953892E-14	BP		1.80989927026837E-12
rRNA binding	44	GO:0019843	GO:0019843	0.830466703756259	1.70386497542627E-14	MF		2.27382451426493E-12
catalytic activity, acting on DNA	146	GO:0140097	GO:0140097	0.68198707447308	1.74210802094984E-14	MF		2.28015138280474E-12
mitotic sister chromatid segregation	132	GO:0000070	GO:0000070	0.690457847237508	2.25307508608873E-14	BP		2.89328849734338E-12
centriole	122	GO:0005814	GO:0005814	0.69468417264964	5.96424746039595E-14	CC		7.51716078063978E-12
spindle organization	146	GO:0007051	GO:0007051	0.676666891166987	9.37869099123835E-14	BP		1.16057037975215E-11
actin filament binding	143	GO:0051015	GO:0051015	0.678115432061707	1.05331301921174E-13	MF		1.28015150156341E-11
polysome	60	GO:0005844	GO:0005844	0.771885684128405	1.66694853858081E-13	CC		1.9903950444879E-11
microtubule cytoskeleton organization involved in mitosis	115	GO:1902850	GO:1902850	0.696664623741197	1.7110496567035E-13	BP		2.00782826957311E-11
regulation of cell cycle G2/M phase transition	198	GO:1902749	GO:1902749	0.650173287535161	1.79779012549952E-13	BP		2.07385755833046E-11
regulation of G2/M transition of mitotic cell cycle	181	GO:0010389	GO:0010389	0.656639383682213	2.01656555767202E-13	BP		2.2874575309193E-11
polysomal ribosome	30	GO:0042788	GO:0042788	0.882214742048499	2.17365371679976E-13	CC		2.42522740926871E-11
myosin complex	64	GO:0016459	GO:0016459	0.7618120825587	2.25416762320602E-13	CC		2.44595382461518E-11
regulation of microtubule cytoskeleton organization	169	GO:0070507	GO:0070507	0.661687272894418	2.26410653762498E-13	BP		2.44595382461518E-11
mRNA 3'-end processing	88	GO:0031124	GO:0031124	0.719675024609848	5.5242254108282E-13	BP		5.86674330634571E-11
regulation of microtubule-based process	198	GO:0032886	GO:0032886	0.646968328078899	5.60297259642185E-13	BP		5.86674330634571E-11
chromatin remodeling	141	GO:0006338	GO:0006338	0.673696515170707	5.80421407581845E-13	BP		5.985375909094E-11
mRNA binding	162	GO:0003729	GO:0003729	0.661961614994544	6.19273979208279E-13	MF		6.29071448133067E-11
mitochondrial respiratory chain complex assembly	81	GO:0033108	GO:0033108	0.727865693718904	6.99544622404353E-13	BP		7.00161867659415E-11
cytoskeleton-dependent cytokinesis	82	GO:0061640	GO:0061640	0.725662303158709	8.41121802493318E-13	BP		8.29663041705728E-11
nucleolar part	151	GO:0044452	GO:0044452	0.664359612374509	1.70331592256187E-12	CC		1.6561097384223E-10
heterochromatin	75	GO:0000792	GO:0000792	0.732437522969496	1.76375997093204E-12	CC		1.69072540312161E-10
membrane docking	150	GO:0022406	GO:0022406	0.664483849368521	1.92967999780603E-12	BP		1.82408362014831E-10
ribonucleoprotein complex subunit organization	180	GO:0071826	GO:0071826	0.65009023391407	2.07253037570621E-12	BP		1.93227969000773E-10
midbody	171	GO:0030496	GO:0030496	0.653069039598627	2.73392803884778E-12	CC		2.51447489627E-10
regulation of mRNA processing	105	GO:0050684	GO:0050684	0.693879429965606	3.51665846390873E-12	BP		3.19125033404837E-10
mitotic cytokinesis	69	GO:0000281	GO:0000281	0.738136166797439	4.07484184919116E-12	BP		3.64912810863092E-10
mitotic spindle organization	94	GO:0007052	GO:0007052	0.701039827003792	8.48129033343121E-12	BP		7.49657948173154E-10
DNA-dependent DNA replication	129	GO:0006261	GO:0006261	0.671091673181125	1.0316850333908E-11	BP		9.00211325289462E-10
methylated histone binding	64	GO:0035064	GO:0035064	0.741945965021001	1.11559440381133E-11	MF	methylation-dependent protein binding	9.61105761055684E-10
nucleosome binding	49	GO:0031491	GO:0031491	0.774950095597463	1.40945901071187E-11	MF		1.19909725336312E-09
spindle pole	152	GO:0000922	GO:0000922	0.654748145042204	2.44456988750034E-11	CC		2.05404230300337E-09
cellular respiration	162	GO:0045333	GO:0045333	0.649729336499989	2.60700267141656E-11	BP		2.16381221727575E-09
chromosome, telomeric region	141	GO:0000781	GO:0000781	0.659047683571884	3.74937584171668E-11	CC		3.07448819020768E-09
condensed chromosome, centromeric region	110	GO:0000779	GO:0000779	0.678613725847269	5.07796375040596E-11	CC		4.11435967681702E-09
ciliary basal body	110	GO:0036064	GO:0036064	0.678344960972577	5.41508496313462E-11	CC		4.33589038342285E-09
organelle localization by membrane tethering	141	GO:0140056	GO:0140056	0.657541953747043	5.6409660650181E-11	BP		4.46423430680386E-09
organellar small ribosomal subunit	27	GO:0000314	GO:0000314	0.85744301994302	6.47430793821001E-11	CC	mitochondrial small ribosomal subunit	5.06484365832843E-09
RNA modification	120	GO:0009451	GO:0009451	0.669638372387733	7.24930415961659E-11	BP		5.60667773981256E-09
inner mitochondrial membrane protein complex	103	GO:0098800	GO:0098800	0.682497995779742	8.12668195573443E-11	CC		6.21462892030658E-09
kinetochore	131	GO:0000776	GO:0000776	0.661751690837582	8.61967307935819E-11	CC		6.51838833090132E-09
DNA geometric change	86	GO:0032392	GO:0032392	0.69869199076888	9.83744751231818E-11	BP		7.35754590866346E-09
ATP synthesis coupled electron transport	76	GO:0042773	GO:0042773	0.710601576299649	1.12515249354452E-10	BP		8.32368246854783E-09
transferase complex, transferring phosphorus-containing groups	179	GO:0061695	GO:0061695	0.637365879911533	1.24968559672685E-10	CC		9.14554857131499E-09
microtubule organizing center organization	122	GO:0031023	GO:0031023	0.665283641123571	1.51343608198393E-10	BP		1.09579212489177E-08
oxidative phosphorylation	115	GO:0006119	GO:0006119	0.669537577811426	1.77146506442937E-10	BP		1.26911486615856E-08
metaphase plate congression	55	GO:0051310	GO:0051310	0.743968170557766	1.97997628101389E-10	BP		1.40372068422714E-08
respiratory electron transport chain	92	GO:0022904	GO:0022904	0.688468287415451	2.15818432517725E-10	BP		1.51428891929447E-08
mitotic spindle assembly	51	GO:0090307	GO:0090307	0.751222117906051	2.75598906295801E-10	BP		1.91400628188696E-08
mitochondrial ATP synthesis coupled electron transport	75	GO:0042775	GO:0042775	0.707065417126057	2.90047659188582E-10	BP		1.99400441256312E-08
muscle filament sliding	39	GO:0030049	GO:0030049	0.786184372862954	3.15268188949463E-10	BP	actin-myosin filament sliding	2.14571529399005E-08
ribosomal large subunit biogenesis	27	GO:0042273	GO:0042273	0.843597374847375	3.22970546406408E-10	BP		2.17637380083368E-08
ribonucleoprotein complex assembly	168	GO:0022618	GO:0022618	0.637628013963058	4.03423295501004E-10	BP		2.69186171488219E-08
DNA-templated transcription, elongation	106	GO:0006354	GO:0006354	0.672763139207784	4.15301887596679E-10	BP		2.74421810386699E-08
ATP-dependent chromatin remodeling	63	GO:0043044	GO:0043044	0.722708554641906	4.98122146127812E-10	BP		3.25982627552489E-08
chromosome localization	72	GO:0050000	GO:0050000	0.706896122784859	6.54738460001442E-10	BP	establishment of chromosome localization	4.24395234168554E-08
spindle assembly	89	GO:0051225	GO:0051225	0.685638158537171	7.33505508942906E-10	BP		4.70965895647681E-08
plasma membrane bounded cell projection cytoplasm	181	GO:0032838	GO:0032838	0.630404535249662	7.73308372556692E-10	CC		4.91881942394471E-08
centrosome cycle	112	GO:0007098	GO:0007098	0.665204169750802	8.04861598003341E-10	BP		5.0721185518618E-08
regulation of RNA splicing	111	GO:0043484	GO:0043484	0.665570101740314	8.74842986521733E-10	BP		5.46255171217148E-08
U2-type precatalytic spliceosome	48	GO:0071005	GO:0071005	0.751160671297888	8.84525813487126E-10	CC	precatalytic spliceosome	5.47280244235762E-08
telomere organization	142	GO:0032200	GO:0032200	0.646401844782785	9.06698549520189E-10	BP		5.55945074597694E-08
nucleosomal DNA binding	30	GO:0031492	GO:0031492	0.816461725172311	9.98602630089585E-10	MF		6.03845184769421E-08
histone binding	171	GO:0042393	GO:0042393	0.633183321325882	1.00256400057221E-09	MF		6.03845184769421E-08
myosin II complex	22	GO:0016460	GO:0016460	0.868841868738882	1.06075351644605E-09	CC		6.26168233087543E-08
positive regulation of chromosome organization	169	GO:2001252	GO:2001252	0.633743077563302	1.06421595048385E-09	BP		6.26168233087543E-08
protein folding	173	GO:0006457	GO:0006457	0.632196058584661	1.06722766732523E-09	BP		6.26168233087543E-08
cytokinesis	145	GO:0000910	GO:0000910	0.6427154515804	1.57812051239095E-09	BP		9.18007539088275E-08
fibrillar center	131	GO:0001650	GO:0001650	0.648353836015157	2.38049374031757E-09	CC		1.37302037259334E-07
myofibril	196	GO:0030016	GO:0030016	0.62135348198066	2.52601856315447E-09	CC		1.43469440798952E-07
mitochondrial membrane part	186	GO:0044455	GO:0044455	0.624495162746315	2.55074663225528E-09	CC		1.43469440798952E-07
regulation of mRNA splicing, via spliceosome	72	GO:0048024	GO:0048024	0.699267041757569	2.57048983485625E-09	BP		1.43469440798952E-07
telomere maintenance	139	GO:0000723	GO:0000723	0.643744970800768	2.57174137194713E-09	BP		1.43469440798952E-07
DNA-dependent ATPase activity	72	GO:0008094	GO:0008094	0.69893979408275	2.72282083582491E-09	MF		1.50662752915645E-07
mitotic metaphase plate congression	41	GO:0007080	GO:0007080	0.763029313230022	2.84114692305182E-09	BP		1.55942306115247E-07
nuclear chromosome, telomeric region	107	GO:0000784	GO:0000784	0.663134455517117	2.87453497650772E-09	CC		1.56512680400892E-07
NADH dehydrogenase complex assembly	58	GO:0010257	GO:0010257	0.719230979183132	3.91710552035383E-09	BP	mitochondrial respiratory chain complex I assembly	2.11585874377207E-07
NADH dehydrogenase activity	38	GO:0003954	GO:0003954	0.769702023289718	4.42180467396835E-09	MF	NADH dehydrogenase (ubiquinone) activity, NADH dehydrogenase (quinone) activity	2.36966949693139E-07
condensed chromosome kinetochore	100	GO:0000777	GO:0000777	0.66641885828674	4.59835651938747E-09	CC		2.44503238054305E-07
calmodulin binding	168	GO:0005516	GO:0005516	0.628593555460883	4.72586399384856E-09	MF		2.49335118931266E-07
protein depolymerization	93	GO:0051261	GO:0051261	0.671792258123866	5.31178297542353E-09	BP		2.78092268697942E-07
GTPase activator activity	200	GO:0005096	GO:0005096	0.617142559254883	6.02177622378557E-09	MF		3.12856557092248E-07
tRNA metabolic process	158	GO:0006399	GO:0006399	0.63050195150238	7.95753320873797E-09	BP		4.10295234989929E-07
respiratory chain	74	GO:0070469	GO:0070469	0.688517843275647	1.05195746887052E-08	CC		5.3831748369419E-07
respiratory chain complex	59	GO:0098803	GO:0098803	0.708749440005973	1.48656739332356E-08	CC		7.55043110370163E-07
modification-dependent protein binding	133	GO:0140030	GO:0140030	0.63933286932566	1.50624510987752E-08	MF		7.59370682801954E-07
RNA polymerase complex	86	GO:0030880	GO:0030880	0.672555862226021	1.63110575699885E-08	CC		8.16272483980453E-07
positive regulation of viral process	103	GO:0048524	GO:0048524	0.657671806586712	1.66223805380034E-08	BP		8.2578045212884E-07
negative regulation of gene expression, epigenetic	70	GO:0045814	GO:0045814	0.690685796947421	1.76264047912227E-08	BP		8.69313847891752E-07
mitochondrial electron transport, NADH to ubiquinone	47	GO:0006120	GO:0006120	0.73206854166057	1.87508081056687E-08	BP		9.18115107677561E-07
DNA duplex unwinding	76	GO:0032508	GO:0032508	0.682293650189149	2.00301534607391E-08	BP		9.73751603241357E-07
cytoplasmic translation	69	GO:0002181	GO:0002181	0.691225884509185	2.0177547548052E-08	BP		9.73960202922283E-07
alternative mRNA splicing, via spliceosome	54	GO:0000380	GO:0000380	0.715342604697865	2.23287240703491E-08	BP		1.07020631001969E-06
mitochondrial respiratory chain complex I	44	GO:0005747	GO:0005747	0.737668231514068	2.47980251564205E-08	CC	NADH dehydrogenase complex, respiratory chain complex I	1.18024726723495E-06
ruffle	168	GO:0001726	GO:0001726	0.621943104171414	2.61342983539121E-08	CC		1.23520857358837E-06
chromatin DNA binding	77	GO:0031490	GO:0031490	0.679161706659984	2.79487256926315E-08	MF		1.31185535906242E-06
transcription elongation from RNA polymerase II promoter	79	GO:0006368	GO:0006368	0.676217922542953	3.13771791727981E-08	BP		1.46269233869907E-06
establishment or maintenance of cell polarity	172	GO:0007163	GO:0007163	0.618833740693238	4.01061068772357E-08	BP		1.84663207000383E-06
regulation of signal transduction by p53 class mediator	178	GO:1901796	GO:1901796	0.616833190242366	4.01559721364336E-08	BP		1.84663207000383E-06
oxidoreductase activity, acting on NAD(P)H, quinone or similar compound as acceptor	50	GO:0016655	GO:0016655	0.719372635344294	4.06786716484665E-08	MF		1.84761991206966E-06
histone lysine methylation	109	GO:0034968	GO:0034968	0.648875041030301	4.07203918322728E-08	BP		1.84761991206966E-06
DNA-directed RNA polymerase complex	84	GO:0000428	GO:0000428	0.669223608908502	4.23088155581181E-08	CC	nuclear DNA-directed RNA polymerase complex	1.90697879926193E-06
mitochondrial respiratory chain	70	GO:0005746	GO:0005746	0.685123844950255	4.3418781430671E-08	CC		1.94413306853386E-06
microfilament motor activity	22	GO:0000146	GO:0000146	0.8293636675717	4.46428046841264E-08	MF		1.98587535085075E-06
contractile fiber part	191	GO:0044449	GO:0044449	0.611852259717286	5.20138294574549E-08	CC		2.29874106030804E-06
regulation of chromosome segregation	91	GO:0051983	GO:0051983	0.661153967445358	5.52444593054524E-08	BP		2.42576638730909E-06
muscle myosin complex	18	GO:0005859	GO:0005859	0.860746943662724	5.84128925662076E-08	CC		2.54844965901031E-06
nuclear nucleosome	12	GO:0000788	GO:0000788	0.941012006861063	6.12414160068177E-08	CC		2.65483488753122E-06
oxidoreductase complex	85	GO:1990204	GO:1990204	0.665350012574331	6.99978365058502E-08	CC		3.01522326113175E-06
establishment of cell polarity	126	GO:0030010	GO:0030010	0.635656055751485	7.52738396139042E-08	BP		3.22209907177504E-06
double-strand break repair	196	GO:0006302	GO:0006302	0.608894235200855	7.80135150018837E-08	BP		3.31849989439263E-06
regulation of DNA-dependent DNA replication	47	GO:0090329	GO:0090329	0.719388919781088	9.87889916127194E-08	BP		4.17613588146688E-06
histone methylation	130	GO:0016571	GO:0016571	0.632016962770231	1.04709142507564E-07	BP		4.39907669078074E-06
histone exchange	41	GO:0043486	GO:0043486	0.734138628338023	1.07460609154442E-07	BP		4.48697488285359E-06
protein localization to chromosome	82	GO:0034502	GO:0034502	0.665730067848765	1.0863191885803E-07	BP		4.50822463260826E-06
spliceosomal complex assembly	43	GO:0000245	GO:0000245	0.727489318699312	1.23642024885199E-07	BP		5.10004619011313E-06
myosin filament	22	GO:0032982	GO:0032982	0.81755141528571	1.26473850944881E-07	CC		5.18542788874011E-06
regulation of spindle assembly	26	GO:0090169	GO:0090169	0.791252185764925	1.37549962263702E-07	BP		5.60577870159735E-06
nucleoid	42	GO:0009295	GO:0009295	0.728532141629426	1.50397283697259E-07	CC	mitochondrial nucleoid	6.08735812296245E-06
sarcomere	173	GO:0030017	GO:0030017	0.613092120618121	1.51155380955136E-07	CC		6.08735812296245E-06
ciliary basal body-plasma membrane docking	95	GO:0097711	GO:0097711	0.651958975550939	1.57867961421975E-07	BP		6.32029026728214E-06
negative regulation of chromosome organization	124	GO:2001251	GO:2001251	0.633072043679868	1.60101090843586E-07	BP		6.33751784847302E-06
exon-exon junction complex	19	GO:0035145	GO:0035145	0.838723662533599	1.60160603869727E-07	CC		6.33751784847302E-06
regulation of mitotic spindle assembly	19	GO:1901673	GO:1901673	0.836592098037515	1.89796451331548E-07	BP		7.45932353939945E-06
virion assembly	38	GO:0019068	GO:0019068	0.738119096628092	1.90702658809213E-07	BP		7.45932353939945E-06
ribosomal small subunit biogenesis	24	GO:0042274	GO:0042274	0.799374556524526	1.92554105231695E-07	BP		7.4756723962704E-06
DNA biosynthetic process	186	GO:0071897	GO:0071897	0.608125331798195	1.93317417241198E-07	BP		7.4756723962704E-06
regulation of viral process	198	GO:0050792	GO:0050792	0.604660827469918	2.02399451957465E-07	BP		7.78265915266951E-06
translation factor activity, RNA binding	67	GO:0008135	GO:0008135	0.678637802721928	2.16981699743155E-07	MF		8.29650251939277E-06
microtubule bundle formation	78	GO:0001578	GO:0001578	0.665354483777532	2.26589466936552E-07	BP		8.6154631953641E-06
condensed nuclear chromosome	75	GO:0000794	GO:0000794	0.66819184123484	2.41960347454239E-07	CC		9.14878958207528E-06
chromatin silencing	52	GO:0006342	GO:0006342	0.700497472943293	2.87690544576365E-07	BP		1.08178002562803E-05
regulation of response to DNA damage stimulus	199	GO:2001020	GO:2001020	0.602969671823113	2.90820077954399E-07	BP		1.08753925854815E-05
regulation of mitotic nuclear division	149	GO:0007088	GO:0007088	0.618719616671517	2.95486928785669E-07	BP		1.09895302585533E-05
small nuclear ribonucleoprotein complex	47	GO:0030532	GO:0030532	0.710165647224092	3.13155889437743E-07	CC		1.15833640408331E-05
Rho GTPase binding	145	GO:0017048	GO:0017048	0.619805261473958	3.30657430435475E-07	MF		1.21646187651018E-05
regulation of nuclear division	171	GO:0051783	GO:0051783	0.610314400503664	3.38973396465514E-07	BP		1.24035104104531E-05
establishment of RNA localization	174	GO:0051236	GO:0051236	0.609102893221397	3.60880226982538E-07	BP		1.31344963895356E-05
negative regulation of mRNA metabolic process	69	GO:1903312	GO:1903312	0.67254243108505	3.65453814462531E-07	BP		1.3230205644851E-05
endonuclease activity	99	GO:0004519	GO:0004519	0.643604738717936	4.05560534785696E-07	MF		1.45711388921777E-05
ciliary plasm	101	GO:0097014	GO:0097014	0.642157740556604	4.07573591849399E-07	CC		1.45711388921777E-05
phosphatidylinositol phosphate binding	143	GO:1901981	GO:1901981	0.619629124683126	4.08916768793116E-07	MF		1.45711388921777E-05
catalytic activity, acting on a tRNA	97	GO:0140101	GO:0140101	0.644971647705848	4.1239464129457E-07	MF		1.45804888266582E-05
U2-type catalytic step 2 spliceosome	30	GO:0071007	GO:0071007	0.760053582468915	4.13463758969297E-07	CC		1.45804888266582E-05
negative regulation of protein depolymerization	56	GO:1901880	GO:1901880	0.690356577563239	4.21929923402845E-07	BP		1.48023456632977E-05
mRNA 5'-UTR binding	23	GO:0048027	GO:0048027	0.796535232795577	4.27589611722435E-07	MF		1.49239738327328E-05
regulation of protein polymerization	176	GO:0032271	GO:0032271	0.607449880457479	4.6013608939745E-07	BP		1.59779909410155E-05
mitochondrial intermembrane space	72	GO:0005758	GO:0005758	0.666686760822138	5.11188720752105E-07	CC		1.76606620986743E-05
midbody abscission	17	GO:0061952	GO:0061952	0.840764665509306	5.75008776010922E-07	BP		1.97652006541936E-05
nucleic acid transport	171	GO:0050657	GO:0050657	0.607866259711432	5.94883256667293E-07	BP	RNA transport	2.03456052506412E-05
axoneme	100	GO:0005930	GO:0005930	0.640410713053082	6.26425556556582E-07	CC		2.13172616896205E-05
chromatin remodeling at centromere	32	GO:0031055	GO:0031055	0.747168069391962	6.55817486838284E-07	BP		2.22064368926436E-05
microtubule polymerization or depolymerization	93	GO:0031109	GO:0031109	0.645162032194264	6.70070576510634E-07	BP		2.25767343749078E-05
protein serine/threonine/tyrosine kinase activity	40	GO:0004712	GO:0004712	0.719753213721042	7.63145025134982E-07	MF		2.55860346850674E-05
centromere complex assembly	40	GO:0034508	GO:0034508	0.719287481955042	8.02998081992635E-07	BP		2.67902203237347E-05
regulation of spindle organization	40	GO:0090224	GO:0090224	0.719225613528563	8.08440411163239E-07	BP		2.68402216506195E-05
tRNA processing	104	GO:0008033	GO:0008033	0.636167602334833	8.21348051374767E-07	BP		2.71363827070712E-05
regulation of viral life cycle	141	GO:1903900	GO:1903900	0.617048769543313	8.29036444651486E-07	BP		2.71659431970833E-05
tRNA binding	47	GO:0000049	GO:0000049	0.702066200357049	8.30225710401607E-07	MF		2.71659431970833E-05
nuclear matrix	106	GO:0016363	GO:0016363	0.634396014035307	8.95746214913525E-07	CC		2.91696111899591E-05
actin polymerization or depolymerization	167	GO:0008154	GO:0008154	0.607268680392336	9.01863796625646E-07	BP		2.92289761896864E-05
extrinsic component of membrane	197	GO:0019898	GO:0019898	0.598816507515442	9.12796934976884E-07	CC		2.94431087177852E-05
positive regulation of viral life cycle	59	GO:1903902	GO:1903902	0.679007923915478	1.00076258166386E-06	BP		3.21282553339822E-05
nuclease activity	163	GO:0004518	GO:0004518	0.607873210633947	1.04783708740941E-06	MF		3.34815925676453E-05
centriolar satellite	30	GO:0034451	GO:0034451	0.748744017769229	1.21124604927079E-06	CC		3.85221523894251E-05
regulation of chromatin organization	164	GO:1902275	GO:1902275	0.606835203934096	1.22317855079199E-06	BP		3.87207126357686E-05
cytokinetic process	37	GO:0032506	GO:0032506	0.723560880468097	1.27206345894235E-06	BP		4.00817773220445E-05
negative regulation of DNA metabolic process	137	GO:0051053	GO:0051053	0.616200338443664	1.37176355934701E-06	BP		4.30240681332523E-05
negative regulation of cytoskeleton organization	122	GO:0051494	GO:0051494	0.622883953919296	1.42084750768707E-06	BP		4.4083182529666E-05
negative regulation of mRNA processing	27	GO:0050686	GO:0050686	0.760355616605617	1.42128934384375E-06	BP		4.4083182529666E-05
pericentric heterochromatin	20	GO:0005721	GO:0005721	0.802399258598201	1.42496329070328E-06	CC		4.4083182529666E-05
protein localization to nucleolus	14	GO:1902570	GO:1902570	0.858833851251336	1.67102057715366E-06	BP		5.14613848330671E-05
sex chromosome	30	GO:0000803	GO:0000803	0.745082549060017	1.69915330333764E-06	CC		5.20920602816034E-05
DNA modification	109	GO:0006304	GO:0006304	0.62887696739501	1.71374935539409E-06	BP		5.2303937725615E-05
regulation of DNA-templated transcription, elongation	39	GO:0032784	GO:0032784	0.714196329744859	1.85143496753523E-06	BP		5.62538678082357E-05
structural constituent of muscle	36	GO:0008307	GO:0008307	0.722584931161661	1.9145392855228E-06	MF		5.79126861211917E-05
regulation of sister chromatid segregation	70	GO:0033045	GO:0033045	0.659309774746848	2.05271891682368E-06	BP		6.18177210084159E-05
ruffle membrane	91	GO:0032587	GO:0032587	0.639182768114887	2.27194257925636E-06	CC		6.81182431472192E-05
U12-type spliceosomal complex	24	GO:0005689	GO:0005689	0.767661768408524	2.83342522135861E-06	CC		8.45802283182751E-05
chemokine activity	30	GO:0008009	GO:0008009	0.73874195690504	3.02016253932723E-06	MF		8.95249001643398E-05
ATP-dependent helicase activity	52	GO:0008026	GO:0008026	0.681459871397952	3.02537864205086E-06	MF	purine NTP-dependent helicase activity	8.95249001643398E-05
snoRNA binding	20	GO:0030515	GO:0030515	0.79216722729457	3.04918778139763E-06	MF		8.98388400008324E-05
extrinsic component of plasma membrane	102	GO:0019897	GO:0019897	0.629699418600716	3.06917517176461E-06	CC		8.98443943923756E-05
regulation of protein depolymerization	71	GO:1901879	GO:1901879	0.655271114146993	3.07737836101071E-06	BP		8.98443943923756E-05
ribosomal large subunit assembly	11	GO:0000027	GO:0000027	0.893598443269135	3.08897859062825E-06	BP		8.98443943923756E-05
transcription elongation factor complex	47	GO:0008023	GO:0008023	0.68939389505107	3.55393429819487E-06	CC		0.000102927986526
nuclear periphery	126	GO:0034399	GO:0034399	0.615729992986061	3.72421162101489E-06	CC		0.000107402475816
regulation of mitotic sister chromatid segregation	57	GO:0033047	GO:0033047	0.67133818717475	3.87199254595203E-06	BP		0.000111193169906
cell cortex part	128	GO:0044448	GO:0044448	0.614584233868179	3.8953536671038E-06	CC		0.000111208948972
positive regulation of ATPase activity	50	GO:0032781	GO:0032781	0.68282038935131	3.90522168736863E-06	BP		0.000111208948972
SNARE complex	28	GO:0031201	GO:0031201	0.74314120867799	4.24584207421428E-06	CC		0.000120405004821
heterochromatin assembly	11	GO:0031507	GO:0031507	0.886619349366331	4.49679431913035E-06	BP		0.000126992456996
RNA methylation	56	GO:0001510	GO:0001510	0.671362702399796	4.63521695929911E-06	BP		0.000130360688533
regulation of ATPase activity	71	GO:0043462	GO:0043462	0.652178848788515	4.69061801697864E-06	BP		0.000131375910385
positive regulation of cytoskeleton organization	200	GO:0051495	GO:0051495	0.59102418850351	4.74628487013377E-06	BP		0.000132390224697
endonuclease activity, active with either ribo- or deoxyribonucleic acids and producing 5'-phosphomonoesters	33	GO:0016893	GO:0016893	0.722642114424442	4.81462863973312E-06	MF		0.000133748418457
protein acetyltransferase complex	79	GO:0031248	GO:0031248	0.644054960510657	4.86239236633584E-06	CC	acetyltransferase complex	0.000134042229356
regulation of mitotic spindle organization	36	GO:0060236	GO:0060236	0.713078138959522	4.8645945711202E-06	BP		0.000134042229356
negative regulation of dephosphorylation	107	GO:0035305	GO:0035305	0.623871792223886	4.88462744047581E-06	BP		0.000134051509516
RNA polymerase II, holoenzyme	71	GO:0016591	GO:0016591	0.651521972840072	5.12482314839956E-06	CC		0.00014007849939
telomere maintenance via telomere lengthening	78	GO:0010833	GO:0010833	0.64417841445893	5.43659238997646E-06	BP		0.000148005791225
nucleus organization	117	GO:0006997	GO:0006997	0.617660470528473	5.64520228595677E-06	BP		0.000153072696248
endodeoxyribonuclease activity	28	GO:0004520	GO:0004520	0.739294790654774	5.88078113791511E-06	MF		0.00015882776359
positive regulation of protein polymerization	113	GO:0032273	GO:0032273	0.619203674333348	6.14585270480766E-06	BP		0.000165330725332
myofilament	19	GO:0036379	GO:0036379	0.789462845746987	6.27611668213323E-06	CC		0.000168170276136
small nucleolar ribonucleoprotein complex	20	GO:0005732	GO:0005732	0.781955790485344	6.35995861851554E-06	CC		0.000169748542579
actin filament polymerization	142	GO:0030041	GO:0030041	0.606195428019832	6.43955002421992E-06	BP		0.000170272596758
regulation of organelle assembly	181	GO:1902115	GO:1902115	0.594186507616915	6.44220184411338E-06	BP		0.000170272596758
centrosome duplication	59	GO:0051298	GO:0051298	0.664259081236467	6.45464736462328E-06	BP		0.000170272596758
regulation of actin filament length	145	GO:0030832	GO:0030832	0.605016976347721	6.54427774820372E-06	BP		0.000171970480132
ribonucleoprotein complex disassembly	13	GO:0032988	GO:0032988	0.848792897784252	6.67469940357636E-06	BP		0.000174723092849
mRNA transport	141	GO:0051028	GO:0051028	0.606299517989716	6.77054270264146E-06	BP		0.000176552925801
actin filament depolymerization	48	GO:0030042	GO:0030042	0.681498899511658	6.84938745768869E-06	BP		0.000177927217699
electron transport chain	160	GO:0022900	GO:0022900	0.599305555555556	7.54866227501679E-06	BP		0.000195346750737
ribonucleoprotein complex binding	106	GO:0043021	GO:0043021	0.621640848841618	7.71765126842865E-06	MF		0.000198963388382
organelle envelope lumen	81	GO:0031970	GO:0031970	0.638810164546641	7.96285180221737E-06	CC		0.000204510073079
viral budding via host ESCRT complex	21	GO:0039702	GO:0039702	0.771996756961744	7.9970800154064E-06	BP		0.000204617017236
viral budding	25	GO:0046755	GO:0046755	0.748921851394039	8.25232148057255E-06	BP		0.000210356928827
negative regulation of supramolecular fiber organization	114	GO:1902904	GO:1902904	0.616446110785843	8.93722563397795E-06	BP		0.000226965513675
oxidoreductase activity, acting on NAD(P)H	87	GO:0016651	GO:0016651	0.632991676575505	9.1740433544454E-06	MF		0.000232113528143
preribosome	14	GO:0030684	GO:0030684	0.830273205830744	9.40375838665796E-06	CC		0.000237044368813
cell cycle checkpoint	196	GO:0000075	GO:0000075	0.58873495197537	9.58900363378046E-06	BP		0.000240821987939
transport along microtubule	142	GO:0010970	GO:0010970	0.603733930060111	1.01739389545694E-05	BP	microtubule-based transport	0.000254572898988
positive regulation of chromosome segregation	24	GO:0051984	GO:0051984	0.750987090571998	1.04190255897276E-05	BP		0.000259750506094
regulation of actin polymerization or depolymerization	144	GO:0008064	GO:0008064	0.60272902290229	1.07325454194005E-05	BP		0.000266590161038
microtubule motor activity	43	GO:0003777	GO:0003777	0.687269744416302	1.08078533133229E-05	MF		0.000267484544184
negative regulation of actin filament depolymerization	35	GO:0030835	GO:0030835	0.707119296316658	1.12048190056661E-05	BP		0.000276304341132
mRNA cis splicing, via spliceosome	13	GO:0045292	GO:0045292	0.839492879838701	1.12661209468856E-05	BP		0.000276813065576
regulation of actin filament depolymerization	45	GO:0030834	GO:0030834	0.68230107428292	1.17057738460547E-05	BP		0.00028567405263
phosphatase regulator activity	77	GO:0019208	GO:0019208	0.639514172939397	1.17107053605283E-05	MF		0.00028567405263
protein refolding	17	GO:0042026	GO:0042026	0.796156485929993	1.18244865664817E-05	BP		0.000287419484184
phosphatidylinositol bisphosphate binding	96	GO:1902936	GO:1902936	0.624826041451016	1.20742047389738E-05	MF		0.000291962197714
extrinsic component of cytoplasmic side of plasma membrane	54	GO:0031234	GO:0031234	0.666177358807924	1.20971701080435E-05	CC		0.000291962197714
negative regulation of protein complex disassembly	63	GO:0043242	GO:0043242	0.653567384908613	1.25934907384555E-05	BP		0.000302866777265
unfolded protein binding	80	GO:0051082	GO:0051082	0.636297132418832	1.26976026560913E-05	MF		0.000304295365061
histone monoubiquitination	29	GO:0010390	GO:0010390	0.725912047410832	1.27698377599025E-05	BP		0.000304952686996
actin filament-based movement	127	GO:0030048	GO:0030048	0.608287864431884	1.28369869875437E-05	BP		0.000305284206066
regulation of DNA replication	101	GO:0006275	GO:0006275	0.621301140192716	1.2873430376266E-05	BP		0.000305284206066
mitotic cytokinetic process	24	GO:1902410	GO:1902410	0.747939984893223	1.31090584265438E-05	BP		0.000309792540455
positive regulation of supramolecular fiber organization	180	GO:1902905	GO:1902905	0.590815421515775	1.36770527575301E-05	BP		0.000322096958712
cell cycle DNA replication	57	GO:0044786	GO:0044786	0.660290264546431	1.43352909430956E-05	BP		0.000336434448823
peptidyl-lysine methylation	122	GO:0018022	GO:0018022	0.609786199588606	1.43900731466488E-05	BP		0.000336559580193
cytoskeleton-dependent intracellular transport	153	GO:0030705	GO:0030705	0.598091289538771	1.45231198975842E-05	BP		0.000338508061722
mitotic spindle	97	GO:0072686	GO:0072686	0.622735195975895	1.50102878412471E-05	CC		0.000348669006988
positive regulation of mitotic cell cycle	140	GO:0045931	GO:0045931	0.602142807701055	1.5477989317622E-05	BP		0.000358310188081
striated muscle thin filament	16	GO:0005865	GO:0005865	0.799314563173427	1.69923717227624E-05	CC		0.000392034176085
spliceosomal snRNP complex	39	GO:0097525	GO:0097525	0.691801851342682	1.70950286031814E-05	CC		0.000393070150923
X chromosome	10	GO:0000805	GO:0000805	0.878095630102216	1.73478360325073E-05	CC		0.000396376656628
DNA replication-independent nucleosome assembly	39	GO:0006336	GO:0006336	0.69164146274402	1.7355310560544E-05	BP	DNA replication-independent nucleosome organization	0.000396376656628
regulation of alternative mRNA splicing, via spliceosome	41	GO:0000381	GO:0000381	0.686883997947638	1.74185528607904E-05	BP		0.000396490537694
microtubule associated complex	92	GO:0005875	GO:0005875	0.624727417250326	1.80585336714543E-05	CC		0.000409687933893
single-stranded RNA binding	63	GO:0003727	GO:0003727	0.650395841803168	1.84478548989825E-05	MF		0.000416275694383
negative regulation of phosphatase activity	100	GO:0010923	GO:0010923	0.619516808172845	1.84712400387314E-05	BP		0.000416275694383
DNA helicase activity	42	GO:0003678	GO:0003678	0.68390381247033	1.87372851766553E-05	MF		0.000420877765387
nucleotidyltransferase activity	96	GO:0016779	GO:0016779	0.621678254318772	1.92642371700605E-05	MF		0.000428815141974
translation initiation factor activity	41	GO:0003743	GO:0003743	0.685834342187778	1.92711636915706E-05	MF		0.000428815141974
regulation of cell division	159	GO:0051302	GO:0051302	0.594749377956559	1.92796699153943E-05	BP		0.000428815141974
negative regulation of protein dephosphorylation	61	GO:0035308	GO:0035308	0.652340743449282	1.95383925973016E-05	BP		0.000433154071717
histone acetyltransferase complex	71	GO:0000123	GO:0000123	0.641172052984759	1.97417943878626E-05	CC		0.000436242378584
dosage compensation	17	GO:0007549	GO:0007549	0.787415721264484	2.04306008206956E-05	BP		0.000449989075985
positive regulation of cell cycle phase transition	83	GO:1901989	GO:1901989	0.630338784813828	2.05196228181918E-05	BP		0.000449989075985
regulation of centrosome cycle	54	GO:0046605	GO:0046605	0.661410429902826	2.05622395873221E-05	BP		0.000449989075985
Rho guanyl-nucleotide exchange factor activity	72	GO:0005089	GO:0005089	0.639756765032342	2.08648789561053E-05	MF		0.000455148609536
viral release from host cell	35	GO:0019076	GO:0019076	0.699479698421425	2.22242468882896E-05	BP	exit from host, exit from host cell, movement in host environment, movement in environment of other organism involved in symbiotic interaction	0.000483253112849
kinetochore organization	20	GO:0051383	GO:0051383	0.763633555296217	2.23993675863235E-05	BP		0.000485509859212
nuclear heterochromatin	33	GO:0005720	GO:0005720	0.70516696440841	2.27133841858047E-05	CC		0.000490753310376
microtubule depolymerization	34	GO:0007019	GO:0007019	0.702092958395479	2.27948153811603E-05	BP		0.000490954156595
axon cytoplasm	54	GO:1904115	GO:1904115	0.659472312056087	2.54096955403903E-05	CC		0.00054413095004
Cajal body	53	GO:0015030	GO:0015030	0.660956352183949	2.54311789264625E-05	CC		0.00054413095004
histone ubiquitination	44	GO:0016574	GO:0016574	0.676568858494871	2.55036398858017E-05	BP		0.00054413095004
cell division site	57	GO:0032153	GO:0032153	0.655058499655884	2.59147054282418E-05	CC	cell division site part	0.000551173391077
regulation of viral genome replication	92	GO:0045069	GO:0045069	0.621912353585194	2.69802485325743E-05	BP		0.000571612510719
5S rRNA binding	11	GO:0008097	GO:0008097	0.851543009679673	2.70436715326947E-05	MF		0.000571612510719
protein kinase regulator activity	136	GO:0019887	GO:0019887	0.600368588373693	2.72317350551711E-05	MF		0.000573805538036
RNA helicase activity	34	GO:0003724	GO:0003724	0.699768796407452	2.78566485131995E-05	MF		0.000585161573398
cytochrome complex assembly	25	GO:0017004	GO:0017004	0.731685208075814	3.04489775397457E-05	BP		0.000637648434263
sperm chromatin condensation	12	GO:0035092	GO:0035092	0.833830760434534	3.1120499366454E-05	BP		0.000648623045547
CENP-A containing nucleosome assembly	28	GO:0034080	GO:0034080	0.718644824507178	3.11641950576502E-05	BP	CENP-A containing chromatin organization	0.000648623045547
RNA phosphodiester bond hydrolysis	125	GO:0090501	GO:0090501	0.603809155026967	3.12589419540554E-05	BP		0.000648623045547
DNA ligation	17	GO:0006266	GO:0006266	0.780059752109492	3.19999319633547E-05	BP		0.000661980355449
positive regulation of histone methylation	39	GO:0031062	GO:0031062	0.684769428170583	3.28046767730975E-05	BP		0.000676571606417
regulation of telomere maintenance	79	GO:0032204	GO:0032204	0.629965832905808	3.29536832548956E-05	BP		0.000677591444812
regulation of transcription elongation from RNA polymerase II promoter	22	GO:0034243	GO:0034243	0.745348438036389	3.3986569207769E-05	BP		0.000696724668759
beta-tubulin binding	38	GO:0048487	GO:0048487	0.686617998704921	3.44982136092118E-05	MF		0.000705089615088
phosphoprotein binding	76	GO:0051219	GO:0051219	0.631922606806452	3.54219775399033E-05	MF		0.000720719618942
Sm-like protein family complex	56	GO:0120114	GO:0120114	0.653565775632392	3.54747388107092E-05	CC		0.000720719618942
sister chromatid cohesion	50	GO:0007062	GO:0007062	0.662014170736741	3.72307422255405E-05	BP		0.000754144141628
negative regulation of cell cycle G2/M phase transition	93	GO:1902750	GO:1902750	0.618711339211925	3.85999075278898E-05	BP		0.000779557776364
mitotic G2/M transition checkpoint	22	GO:0044818	GO:0044818	0.743282464188746	3.9119784844671E-05	BP		0.000787719691281
genetic imprinting	25	GO:0071514	GO:0071514	0.728031863754979	3.9720090047896E-05	BP		0.000797448179546
cleavage furrow	55	GO:0032154	GO:0032154	0.653733453444436	4.04227094106871E-05	CC		0.000809167530145
telomere maintenance via telomerase	66	GO:0007004	GO:0007004	0.639790230658628	4.33672855076814E-05	BP		0.000865565235089
DNA methylation or demethylation	84	GO:0044728	GO:0044728	0.623768317228291	4.46351242705123E-05	BP		0.000888265075395
DNA-dependent DNA replication maintenance of fidelity	33	GO:0045005	GO:0045005	0.696919726327449	4.53779414572897E-05	BP		0.000900414780053
RNA 5'-end processing	20	GO:0000966	GO:0000966	0.75276652708176	4.55790015096705E-05	BP		0.000901775244985
histone-lysine N-methyltransferase activity	43	GO:0018024	GO:0018024	0.672386279325607	4.61603927074519E-05	MF		0.000910630819614
negative regulation of G2/M transition of mitotic cell cycle	81	GO:0010972	GO:0010972	0.625718944736363	4.64385308638075E-05	BP		0.000913295470192
regulation of microtubule polymerization or depolymerization	68	GO:0031110	GO:0031110	0.637109386078283	4.66590137318321E-05	BP		0.000913295470192
positive regulation of mitotic cell cycle phase transition	68	GO:1901992	GO:1901992	0.637102295977279	4.66980346204729E-05	BP		0.000913295470192
methyltransferase complex	88	GO:0034708	GO:0034708	0.620545147314235	4.70594867995314E-05	CC		0.000917727413059
cellular senescence	66	GO:0090398	GO:0090398	0.638970101817013	4.77086260217071E-05	BP		0.000927728310582
RNA methyltransferase activity	48	GO:0008173	GO:0008173	0.662800628195428	4.79712715057601E-05	MF		0.000930177988229
ESCRT III complex	10	GO:0000815	GO:0000815	0.85492213761405	5.08555061720372E-05	CC		0.000983302769906
peptidyl-lysine trimethylation	42	GO:0018023	GO:0018023	0.672584262305816	5.46919366341641E-05	BP		0.001054485327853
protein peptidyl-prolyl isomerization	33	GO:0000413	GO:0000413	0.694273364398416	5.63551294641407E-05	BP		0.001083483082296
histone H3-K9 methylation	37	GO:0051567	GO:0051567	0.68295346893285	5.90528876523816E-05	BP		0.001131458467835
protein kinase inhibitor activity	60	GO:0004860	GO:0004860	0.643763337234116	5.91829583527919E-05	MF		0.001131458467835
nucleotide-excision repair	102	GO:0006289	GO:0006289	0.610308161925454	6.01413088148758E-05	BP		0.001143592011581
protein N-terminus binding	108	GO:0047485	GO:0047485	0.60722105833992	6.01536791281309E-05	MF		0.001143592011581
actin filament capping	32	GO:0051693	GO:0051693	0.69623625901752	6.12529013251028E-05	BP		0.001161245811751
ribosome assembly	26	GO:0042255	GO:0042255	0.717456535635232	6.21545327957144E-05	BP		0.001175065972799
regulation of chromosome separation	52	GO:1905818	GO:1905818	0.653858061443201	6.24334850909138E-05	BP		0.001177070081797
GDP binding	59	GO:0019003	GO:0019003	0.644337293735534	6.33866983613281E-05	MF		0.001191739969744
microtubule anchoring	23	GO:0034453	GO:0034453	0.729989372246038	6.7350429983282E-05	BP		0.001262774177593
protein phosphatase regulator activity	66	GO:0019888	GO:0019888	0.635805406172461	6.86168579112145E-05	MF		0.001280651575866
RNA export from nucleus	119	GO:0006405	GO:0006405	0.601317192622141	6.86802564194827E-05	BP		0.001280651575866
rRNA modification	22	GO:0000154	GO:0000154	0.73470648815654	6.93440581412348E-05	BP		0.001289496338003
endoribonuclease activity, producing 5'-phosphomonoesters	25	GO:0016891	GO:0016891	0.720090646889164	6.98611220041601E-05	MF		0.001295571652208
vesicle docking involved in exocytosis	31	GO:0006904	GO:0006904	0.697293655648042	7.20377474570244E-05	BP		0.001332306818458
tau-protein kinase activity	21	GO:0050321	GO:0050321	0.739471567838999	7.27579225370178E-05	MF		0.001341979460127
ncRNA transcription	104	GO:0098781	GO:0098781	0.607794815141359	7.40210340327783E-05	BP		0.001361586912506
meiotic cell cycle process	151	GO:1903046	GO:1903046	0.58954480979303	7.47835099106006E-05	BP		0.001371904497174
deoxyribonuclease activity	41	GO:0004536	GO:0004536	0.671062030295815	7.56716738046707E-05	MF		0.001384466161061
regulation of DNA repair	111	GO:0006282	GO:0006282	0.604048577452833	7.75370345905627E-05	BP		0.001414791038669
RNA phosphodiester bond hydrolysis, endonucleolytic	64	GO:0090502	GO:0090502	0.636719556909729	7.82826056110954E-05	BP		0.001424575972698
multivesicular body organization	31	GO:0036257	GO:0036257	0.695757873928499	8.11422459334418E-05	BP		0.001472677668861
regulation of cell aging	47	GO:0090342	GO:0090342	0.659030115016535	8.145386107173E-05	BP		0.001474401538442
protein methylation	169	GO:0006479	GO:0006479	0.584061179278696	8.38016975851156E-05	BP	protein alkylation	0.001512876269932
sulfotransferase activity	48	GO:0008146	GO:0008146	0.656902698489121	8.51885888818867E-05	MF		0.001533845333148
spindle midzone	27	GO:0051233	GO:0051233	0.708936202686203	8.59064817836194E-05	CC		0.001542690013244
ncRNA 5'-end processing	18	GO:0034471	GO:0034471	0.755767573462679	8.61450330977856E-05	BP		0.001542902882272
regulation of cyclin-dependent protein kinase activity	83	GO:1904029	GO:1904029	0.619264149814924	8.73487760761477E-05	BP		0.00155923152192
multivesicular body assembly	30	GO:0036258	GO:0036258	0.697989512491127	8.75149046978135E-05	BP		0.00155923152192
negative regulation of DNA replication	35	GO:0008156	GO:0008156	0.683277703604806	8.79187484872241E-05	BP		0.001562336820376
endosomal transport	186	GO:0016197	GO:0016197	0.57987833879517	8.85931549687643E-05	BP		0.001570221387285
ribonucleoprotein complex export from nucleus	113	GO:0071426	GO:0071426	0.602111690049047	9.00464543163438E-05	BP		0.001591834202798
regulation of mitotic metaphase/anaphase transition	44	GO:0030071	GO:0030071	0.662983753508404	9.22729880963644E-05	BP		0.001626968800476
RNA-dependent DNA biosynthetic process	68	GO:0006278	GO:0006278	0.631064568536968	9.38301008568733E-05	BP		0.001650149008868
ribonucleoprotein complex localization	114	GO:0071166	GO:0071166	0.601196905065815	9.64551193480874E-05	BP		0.001691942119286
regulation of metaphase/anaphase transition of cell cycle	46	GO:1902099	GO:1902099	0.658841715927677	9.73093463488013E-05	BP		0.001701332208197
negative regulation of phosphoprotein phosphatase activity	56	GO:0032515	GO:0032515	0.643993875163444	9.74903851303157E-05	BP		0.001701332208197
site of DNA damage	65	GO:0090734	GO:0090734	0.633479177481381	9.98430414349046E-05	CC		0.00173793283889
7-methylguanosine RNA capping	34	GO:0009452	GO:0009452	0.684039272274566	0.000102437371256	BP	RNA capping	0.001777537363142
viral genome replication	117	GO:0019079	GO:0019079	0.599480800240994	0.000102640638218	BP		0.001777537363142
pseudouridine synthesis	14	GO:0001522	GO:0001522	0.786410289086471	0.000103482027394	BP		0.001779671361881
ribonucleoprotein granule	187	GO:0035770	GO:0035770	0.578825386215092	0.000103678694137	CC		0.001779671361881
positive regulation of viral genome replication	35	GO:0045070	GO:0045070	0.681239692138538	0.000103751496079	BP		0.001779671361881
positive regulation of signal transduction by p53 class mediator	21	GO:1901798	GO:1901798	0.733858365534872	0.000103809804682	BP		0.001779671361881
ATP-dependent DNA helicase activity	31	GO:0004003	GO:0004003	0.692309567499047	0.000105678318722	MF		0.001807152354826
Flemming body	28	GO:0090543	GO:0090543	0.702081677509248	0.000107582379893	CC		0.001835101948755
blastocyst growth	19	GO:0001832	GO:0001832	0.744793924679904	0.000110487580392	BP		0.001879946180366
non-recombinational repair	75	GO:0000726	GO:0000726	0.623373759647189	0.000111447871512	BP		0.001891556642179
mitotic cell cycle checkpoint	146	GO:0007093	GO:0007093	0.588619446344265	0.000111867713929	BP		0.001893959355718
chromosome condensation	31	GO:0030261	GO:0030261	0.691294577560301	0.000114133336883	BP		0.001927522309742
regulation of histone modification	137	GO:0031056	GO:0031056	0.591267143181876	0.000115258376668	BP		0.00194170423664
positive regulation of translation	114	GO:0045727	GO:0045727	0.599928360249757	0.000115982669749	BP		0.001949081605708
regulation of phosphatase activity	169	GO:0010921	GO:0010921	0.582170052063455	0.000117186780573	BP		0.001964466080242
nuclear export	173	GO:0051168	GO:0051168	0.58118672356917	0.0001180029067	BP		0.001973286936115
mitotic G2 DNA damage checkpoint	18	GO:0007095	GO:0007095	0.750158250776001	0.000119327153487	BP		0.001988596335208
ncRNA catabolic process	24	GO:0034661	GO:0034661	0.716650644326947	0.00011962191404	BP		0.001988596335208
mRNA splice site selection	20	GO:0006376	GO:0006376	0.73727260245761	0.000119794959952	BP		0.001988596335208
regulation of centrosome duplication	40	GO:0010824	GO:0010824	0.667326596549117	0.000125730181594	BP		0.002082042861136
regulation of mRNA catabolic process	178	GO:0061013	GO:0061013	0.579661120039676	0.000126589835535	BP		0.002091190341391
replication fork processing	29	GO:0031297	GO:0031297	0.696045781203367	0.000129394219804	BP		0.002127802670522
DNA-templated transcription, termination	68	GO:0006353	GO:0006353	0.628196116245245	0.000129431428974	BP		0.002127802670522
regulation of viral release from host cell	31	GO:1902186	GO:1902186	0.689532750046539	0.000130335054208	BP		0.002137494889014
establishment of spindle localization	36	GO:0051293	GO:0051293	0.675869928756328	0.0001307483004	BP		0.002139117626257
regulation of actin filament polymerization	126	GO:0030833	GO:0030833	0.594278755228897	0.000131133486067	BP		0.002140274595129
peptidyl-proline modification	43	GO:0018208	GO:0018208	0.660809540256351	0.000132474611863	BP		0.002152949361563
protein localization to chromosome, centromeric region	21	GO:0071459	GO:0071459	0.729928797002805	0.000132542724434	BP		0.002152949361563
negative regulation of actin filament polymerization	45	GO:0030837	GO:0030837	0.657141765613778	0.000133246903587	BP		0.002159234347177
cytoplasmic side of membrane	138	GO:0098562	GO:0098562	0.590001715178123	0.000133681818428	CC		0.002161136475577
regulation of mRNA stability	158	GO:0043488	GO:0043488	0.584151467113961	0.00013412218632	BP		0.002163117535775
telomerase holoenzyme complex	18	GO:0005697	GO:0005697	0.74785503466264	0.000136155413357	CC		0.002190718069291
negative regulation of mRNA splicing, via spliceosome	19	GO:0048025	GO:0048025	0.741054654758808	0.000137743586177	BP		0.002211044451695
neuron projection cytoplasm	80	GO:0120111	GO:0120111	0.617689735989522	0.00013827386	CC		0.002211091325633
negative regulation of protein ubiquitination	71	GO:0031397	GO:0031397	0.624844270916211	0.000138954608176	BP		0.002211091325633
positive regulation of microtubule polymerization or depolymerization	31	GO:0031112	GO:0031112	0.688672889574413	0.000139003173892	BP		0.002211091325633
regulation of double-strand break repair	71	GO:2000779	GO:2000779	0.624838449268219	0.000139046001671	BP		0.002211091325633
metaphase/anaphase transition of mitotic cell cycle	47	GO:0007091	GO:0007091	0.653195879305804	0.000140511539998	BP	regulation of mitotic sister chromatid separation	0.002225263204329
regulation of non-canonical Wnt signaling pathway	22	GO:2000050	GO:2000050	0.723715007958056	0.000140591122225	BP		0.002225263204329
SWI/SNF superfamily-type complex	68	GO:0070603	GO:0070603	0.627397973446559	0.000141390974038	CC		0.002232730787251
metaphase/anaphase transition of cell cycle	49	GO:0044784	GO:0044784	0.649707592488089	0.000145056163647	BP		0.002285306133761
organelle fusion	94	GO:0048284	GO:0048284	0.607948664872697	0.000150931473895	BP		0.002368990416082
regulation of cellular senescence	40	GO:2000772	GO:2000772	0.665164638757132	0.000151064037699	BP		0.002368990416082
positive regulation of chromatin organization	101	GO:1905269	GO:1905269	0.604102561298516	0.000152215332158	BP		0.002381557587735
chromosome separation	68	GO:0051304	GO:0051304	0.626660602942189	0.000153352988343	BP		0.002393854217109
regulation of telomere maintenance via telomere lengthening	61	GO:1904356	GO:1904356	0.633657455371149	0.000154009292882	BP		0.002398597820038
regulation of RNA stability	163	GO:0043487	GO:0043487	0.581904222342449	0.000157935242252	BP		0.002454126161572
negative regulation of ubiquitin-dependent protein catabolic process	47	GO:2000059	GO:2000059	0.651791097193362	0.000159791643942	BP		0.002477316466212
vesicle docking	37	GO:0048278	GO:0048278	0.670771802730566	0.000163022688637	BP		0.002521664588331
exocytic process	63	GO:0140029	GO:0140029	0.63074254763872	0.000167305697041	BP		0.002582046653206
protein localization to kinetochore	16	GO:0034501	GO:0034501	0.758913252350559	0.000168225165887	BP		0.002590363074723
polypeptide N-acetylgalactosaminyltransferase activity	19	GO:0004653	GO:0004653	0.737441833579005	0.00016996070873	MF		0.002611179646995
dosage compensation by inactivation of X chromosome	15	GO:0009048	GO:0009048	0.766950315673895	0.000172113600835	BP		0.002638299926316
cytosolic transport	138	GO:0016482	GO:0016482	0.588339196032823	0.00017331836203	BP		0.002646490205955
intercellular bridge	59	GO:0045171	GO:0045171	0.63472989621444	0.000173425599744	CC		0.002646490205955
DNA alkylation	66	GO:0006305	GO:0006305	0.627372478312496	0.000174230198486	BP	DNA methylation	0.002652820427059
transcription-coupled nucleotide-excision repair	73	GO:0006283	GO:0006283	0.62086582440006	0.00017971896847	BP		0.002723978005104
negative regulation of protein polymerization	58	GO:0032272	GO:0032272	0.635520872642349	0.000179835437834	BP		0.002723978005104
spermatid differentiation	138	GO:0048515	GO:0048515	0.588090946567688	0.000180104334748	BP		0.002723978005104
histone H2B ubiquitination	11	GO:0033523	GO:0033523	0.81034203173336	0.000182584089676	BP		0.002750546323311
regulation of histone methylation	64	GO:0031060	GO:0031060	0.628890380775322	0.000182669253326	BP		0.002750546323311
RNA cap binding	14	GO:0000339	GO:0000339	0.775024262089382	0.000183420309398	MF		0.002755758555768
mitotic sister chromatid separation	49	GO:0051306	GO:0051306	0.647003910932925	0.000186472160316	BP		0.002791545639597
transferase activity, transferring sulfur-containing groups	63	GO:0016782	GO:0016782	0.629699938361464	0.000186622578022	MF		0.002791545639597
syntaxin binding	52	GO:0019905	GO:0019905	0.642490275462412	0.000190491832294	MF		0.00284317414603
ribonuclease activity	87	GO:0004540	GO:0004540	0.610118113357115	0.00019462679469	MF		0.002898533839519
nuclear exosome (RNase complex)	10	GO:0000176	GO:0000176	0.82330383480826	0.000199879396207	CC		0.002966319215782
response to UV	135	GO:0009411	GO:0009411	0.588365572879827	0.000200050032331	BP		0.002966319215782
microtubule end	26	GO:1990752	GO:1990752	0.700556808756795	0.000200643163162	CC		0.002968646453215
DNA catabolic process	31	GO:0006308	GO:0006308	0.683511510606423	0.000203474143915	BP		0.003004002220146
spermatid development	132	GO:0007286	GO:0007286	0.589200549248975	0.000204733220339	BP		0.003016048263269
global genome nucleotide-excision repair	26	GO:0070911	GO:0070911	0.699642881670215	0.000213258623057	BP		0.00313485569876
RNA polymerase core enzyme binding	33	GO:0043175	GO:0043175	0.676952290529314	0.000218079352052	MF		0.003198810495838
mRNA export from nucleus	104	GO:0006406	GO:0006406	0.599893641882525	0.000218875429689	BP	mRNA-containing ribonucleoprotein complex export from nucleus	0.003203583170889
nuclear DNA replication	47	GO:0033260	GO:0033260	0.648229389212444	0.00022034164241	BP		0.003218122785921
actin-dependent ATPase activity	12	GO:0030898	GO:0030898	0.792755860491709	0.000222817575068	MF		0.003243995168851
axoneme assembly	52	GO:0035082	GO:0035082	0.640803365880765	0.000223333720957	BP		0.003243995168851
Rho protein signal transduction	158	GO:0007266	GO:0007266	0.581066961665633	0.000223543011195	BP		0.003243995168851
microtubule polymerization	65	GO:0046785	GO:0046785	0.625945779877745	0.000224480575647	BP		0.003250669782665
respiratory chain complex IV assembly	18	GO:0008535	GO:0008535	0.738870966511848	0.000225441842312	BP		0.003257658553665
negative regulation of DNA-dependent DNA replication	20	GO:2000104	GO:2000104	0.726422736321823	0.000228154720098	BP		0.003289875052941
structural constituent of cytoskeleton	76	GO:0005200	GO:0005200	0.616275674715007	0.000230755353291	MF		0.003313831334274
7-methylguanosine mRNA capping	33	GO:0006370	GO:0006370	0.676194402455224	0.000230789898978	BP		0.003313831334274
double-stranded RNA binding	62	GO:0003725	GO:0003725	0.628499250458053	0.000234907887538	MF		0.003365859121225
heterochromatin organization	18	GO:0070828	GO:0070828	0.737936714942687	0.000237355026695	BP		0.003393777965729
actomyosin structure organization	156	GO:0031032	GO:0031032	0.581149644017775	0.000239604846931	BP		0.003418764335875
negative regulation of RNA splicing	24	GO:0033119	GO:0033119	0.705718258600563	0.000243198832314	BP		0.003462785047552
recombinational repair	109	GO:0000725	GO:0000725	0.596668656398636	0.00024798054641	BP		0.003523498118719
regulation of cell shape	122	GO:0008360	GO:0008360	0.591379417814623	0.000249213469501	BP		0.003533639319636
endoribonuclease activity	46	GO:0004521	GO:0004521	0.648370574357962	0.000250443483107	MF		0.003543697185081
cytoplasmic microtubule organization	31	GO:0031122	GO:0031122	0.680426650355911	0.000254378434279	BP		0.003591907932996
snRNA binding	28	GO:0017069	GO:0017069	0.689637239606331	0.000257693916577	MF		0.00363000238905
histone H3-K9 modification	48	GO:0061647	GO:0061647	0.644917692642777	0.000258142985057	BP		0.00363000238905
spindle localization	41	GO:0051653	GO:0051653	0.656631778747321	0.00026096900438	BP		0.003662175348068
tRNA 5'-end processing	16	GO:0099116	GO:0099116	0.750476116944616	0.000261543795159	BP		0.003662689444134
nucleotide-excision repair, DNA duplex unwinding	22	GO:0000717	GO:0000717	0.713391380332678	0.000265668458797	BP		0.003707666864725
rRNA transcription	30	GO:0009303	GO:0009303	0.682778044926839	0.000265845052892	BP		0.003707666864725
protein export from nucleus	160	GO:0006611	GO:0006611	0.579345584667637	0.000272604967738	BP		0.003794170573464
organelle disassembly	78	GO:1903008	GO:1903008	0.613134022914159	0.000278391640443	BP		0.003866803071134
cilium movement	52	GO:0003341	GO:0003341	0.63829615516922	0.000282022725376	BP		0.003909260018143
SNARE binding	65	GO:0000149	GO:0000149	0.623553653342939	0.000287823852668	MF		0.00398156329524
nucleotide-excision repair, preincision complex assembly	29	GO:0006294	GO:0006294	0.68465495923559	0.000289647506101	BP		0.00399866313696
kinase regulator activity	154	GO:0019207	GO:0019207	0.58045415403553	0.000290684950993	MF		0.004004861895661
histone methyltransferase activity	52	GO:0042054	GO:0042054	0.637535392024556	0.000302492333449	MF		0.004159116811016
positive regulation of microtubule polymerization	27	GO:0031116	GO:0031116	0.690626271876272	0.000304072599758	BP		0.004172415552326
intramolecular transferase activity	21	GO:0016866	GO:0016866	0.715923579372707	0.000307321613104	MF		0.004208512874819
G2 DNA damage checkpoint	29	GO:0031572	GO:0031572	0.683752504843883	0.000308181365292	BP		0.004211811992323
RNA polymerase binding	48	GO:0070063	GO:0070063	0.642778331843089	0.000312067970871	MF		0.004238732049675
RNA-dependent ATPase activity	28	GO:0008186	GO:0008186	0.68679412832514	0.000312455497708	MF		0.004238732049675
centriole-centriole cohesion	12	GO:0010457	GO:0010457	0.785168667810177	0.00031257132553	BP		0.004238732049675
DNA integrity checkpoint	140	GO:0031570	GO:0031570	0.583855768375046	0.000312642299285	BP		0.004238732049675
positive regulation of cyclin-dependent protein kinase activity	32	GO:1904031	GO:1904031	0.674697268979732	0.000313729972507	BP		0.004245022252255
positive regulation of viral release from host cell	15	GO:1902188	GO:1902188	0.754822033122884	0.000316704000514	BP		0.00427490217376
chemokine receptor binding	44	GO:0042379	GO:0042379	0.648892313077832	0.000317757556636	MF		0.00427490217376
meiotic nuclear division	142	GO:0140013	GO:0140013	0.583160019305866	0.000317822583004	BP		0.00427490217376
transcription export complex	13	GO:0000346	GO:0000346	0.773490198562245	0.000319825638637	CC		0.0042907721479
DNA polymerase activity	26	GO:0034061	GO:0034061	0.6934514218698	0.00032026333399	MF		0.0042907721479
regulation of protein complex disassembly	98	GO:0043244	GO:0043244	0.599828018722155	0.000322748413372	BP		0.00431557112261
ESCRT complex disassembly	10	GO:1904896	GO:1904896	0.811236880016464	0.000327077432041	BP	ESCRT III complex disassembly	0.004364880397005
spindle microtubule	53	GO:0005876	GO:0005876	0.63526383158813	0.000330955700476	CC		0.00440799314567
phosphatidylinositol-3,4-bisphosphate binding	27	GO:0043325	GO:0043325	0.688527676027676	0.000349186573825	MF		0.00464172621378
kinase inhibitor activity	64	GO:0019210	GO:0019210	0.622463075810783	0.000354322953645	MF		0.004700822655958
double-strand break repair via homologous recombination	108	GO:0000724	GO:0000724	0.594369751338465	0.000356431525514	BP		0.004712601891454
regulation of ubiquitin-dependent protein catabolic process	137	GO:2000058	GO:2000058	0.583869370848382	0.000356595647091	BP		0.004712601891454
regulation of cyclin-dependent protein serine/threonine kinase activity	79	GO:0000079	GO:0000079	0.610100756282871	0.000361588982211	BP		0.004769330645212
peptidyl-prolyl cis-trans isomerase activity	26	GO:0003755	GO:0003755	0.691512628570523	0.000362914417962	MF		0.004777554214019
regulation of Rho protein signal transduction	123	GO:0035023	GO:0035023	0.588298281351176	0.000365274426886	BP		0.004799339284526
RNA polymerase II CTD heptapeptide repeat kinase activity	17	GO:0008353	GO:0008353	0.736505309055674	0.000367929447532	MF		0.00482490909422
double-strand break repair via nonhomologous end joining	67	GO:0006303	GO:0006303	0.619281690719954	0.000370000818643	BP		0.004842741484005
RNA cap binding complex	13	GO:0034518	GO:0034518	0.769774413866633	0.000378809858955	CC		0.004944498023795
DNA damage response, detection of DNA damage	38	GO:0042769	GO:0042769	0.657911015768854	0.000379228323306	BP		0.004944498023795
axonal transport	51	GO:0098930	GO:0098930	0.63622567904432	0.000384095480807	BP		0.004998382107786
spermatid nucleus differentiation	20	GO:0007289	GO:0007289	0.716932106816778	0.00039218622879	BP		0.005093930292258
mitotic spindle pole	26	GO:0097431	GO:0097431	0.690223621581358	0.000394129592902	CC		0.005109420970073
microtubule anchoring at microtubule organizing center	10	GO:0072393	GO:0072393	0.806215270631817	0.000399533542523	BP		0.00516010799649
cellular response to radiation	171	GO:0071478	GO:0071478	0.574462017511407	0.000399555820475	BP		0.00516010799649
chromatin silencing at rDNA	12	GO:0000183	GO:0000183	0.779336763865066	0.000403310161129	BP		0.005198729084556
regulation of cilium assembly	54	GO:1902017	GO:1902017	0.631807304448879	0.000405637568569	BP		0.005218845541923
kinetochore assembly	16	GO:0051382	GO:0051382	0.741734438267792	0.000407589530316	BP		0.005231159442946
cytoplasmic ribonucleoprotein granule	175	GO:0036464	GO:0036464	0.573487173387257	0.000408131893066	CC		0.005231159442946
positive regulation of DNA-templated transcription, elongation	22	GO:0032786	GO:0032786	0.706076210092688	0.000410411012469	BP		0.005242540169302
actomyosin	67	GO:0042641	GO:0042641	0.618247604950454	0.000411323761716	CC		0.005242540169302
positive regulation of multi-organism process	179	GO:0043902	GO:0043902	0.572624535096889	0.000411330656833	BP		0.005242540169302
histone H3-K9 trimethylation	16	GO:0036124	GO:0036124	0.740988092787043	0.000423054407449	BP		0.005381884667478
positive regulation of cardiac muscle cell differentiation	19	GO:2000727	GO:2000727	0.721093817740397	0.000424771864017	BP		0.005393651691234
DNA catabolic process, endonucleolytic	26	GO:0000737	GO:0000737	0.68871273633996	0.000433883747271	BP		0.005499092707498
protein kinase complex	77	GO:1902911	GO:1902911	0.609794409587656	0.000436554476231	CC		0.00552265755619
transcription by RNA polymerase I	62	GO:0006360	GO:0006360	0.622265282327467	0.000437786268101	BP		0.005527965381629
positive regulation of cell division	82	GO:0051781	GO:0051781	0.606345162727739	0.000439876816518	BP		0.005544077061521
negative regulation of protein complex assembly	124	GO:0031333	GO:0031333	0.586588580872661	0.00044087577552	BP		0.005546396540086
actin filament	74	GO:0005884	GO:0005884	0.611854981833622	0.000442711238775	CC		0.005552908518603
regulation of proteolysis involved in cellular protein catabolic process	196	GO:1903050	GO:1903050	0.569015994974183	0.00044302517273	BP		0.005552908518603
demethylase activity	32	GO:0032451	GO:0032451	0.669078495362418	0.00046735108792	MF		0.005847043206585
replication fork	54	GO:0005657	GO:0005657	0.630002981719764	0.000478153875464	CC		0.005971220690663
chaperone-mediated protein folding	35	GO:0061077	GO:0061077	0.66106769810728	0.000488948191166	BP		0.006094837708935
histone H3-K4 methylation	52	GO:0051568	GO:0051568	0.632128019898918	0.00049291585559	BP		0.006133062729697
histone phosphorylation	38	GO:0016572	GO:0016572	0.654172288925627	0.000504874542154	BP		0.006270394404932
protein binding, bridging	156	GO:0030674	GO:0030674	0.576294089113713	0.000513240394043	MF		0.006362685103559
phosphatidylinositol-4,5-bisphosphate binding	65	GO:0005546	GO:0005546	0.617542614388779	0.000527679449997	MF		0.006529793339414
positive regulation of histone modification	88	GO:0031058	GO:0031058	0.601071233752798	0.000529471780535	BP		0.006540081557747
centriole replication	31	GO:0007099	GO:0007099	0.669893359572374	0.000531747771322	BP		0.006552625341711
CXCR chemokine receptor binding	10	GO:0045236	GO:0045236	0.798881800096042	0.000532412843662	MF		0.006552625341711
mitochondrial respiratory chain complex IV assembly	15	GO:0033617	GO:0033617	0.743773446792936	0.000540139003668	BP		0.006635714907881
positive regulation of mitotic sister chromatid segregation	13	GO:0062033	GO:0062033	0.761767531219981	0.000541794410584	BP		0.006644059024212
Ras guanyl-nucleotide exchange factor activity	124	GO:0005088	GO:0005088	0.585004449618939	0.000547468120656	MF		0.00670156120357
synaptonemal complex	34	GO:0000795	GO:0000795	0.661636371720405	0.000555187696611	CC	synaptonemal structure	0.006783855409583
cortical actin cytoskeleton	57	GO:0030864	GO:0030864	0.624755798650101	0.000564413677231	CC		0.00688422847174
cytoplasmic side of plasma membrane	114	GO:0009898	GO:0009898	0.588348418894954	0.000567399593242	CC		0.006908267677293
regulation of gene expression by genetic imprinting	17	GO:0006349	GO:0006349	0.727986596148411	0.000568437834289	BP		0.006908549821738
nucleotide-excision repair, DNA incision, 5'-to lesion	37	GO:0006296	GO:0006296	0.654338255781555	0.000581401006034	BP		0.007053503114208
microtubule organizing center localization	25	GO:0061842	GO:0061842	0.687586869935448	0.000584825486225	BP		0.007082423948834
basal transcription machinery binding	45	GO:0001098	GO:0001098	0.639840156481609	0.000588395855207	MF	basal RNA polymerase II transcription machinery binding	0.007113005667036
cyclin-dependent protein serine/threonine kinase activity	14	GO:0004693	GO:0004693	0.750321043809001	0.000591741335682	MF		0.007140765125273
peptidyl-lysine acetylation	159	GO:0018394	GO:0018394	0.57460380148314	0.000595945290645	BP		0.007178767518814
positive regulation of telomere maintenance	51	GO:0032206	GO:0032206	0.630995931669311	0.000608506023756	BP		0.007317123670816
tau protein binding	45	GO:0048156	GO:0048156	0.639283913262733	0.000615623615229	MF		0.007370237779099
protein localization to microtubule cytoskeleton	47	GO:0072698	GO:0072698	0.636297521144897	0.000615625962085	BP		0.007370237779099
protein localization to centrosome	30	GO:0071539	GO:0071539	0.670486134963706	0.000616171803748	BP		0.007370237779099
negative regulation of protein modification by small protein conjugation or removal	81	GO:1903321	GO:1903321	0.603792726040991	0.000625879181061	BP		0.007473217028603
calcium-dependent phospholipid binding	26	GO:0005544	GO:0005544	0.682740513384013	0.000630239144138	MF		0.007512097399306
positive regulation of non-canonical Wnt signaling pathway	12	GO:2000052	GO:2000052	0.768502001143511	0.000639715966272	BP		0.007611725290992
phosphatidylinositol-3,4,5-trisphosphate binding	38	GO:0005547	GO:0005547	0.650891180800995	0.000645833856998	MF		0.007671108605109
centriole assembly	35	GO:0098534	GO:0098534	0.657148747349407	0.000648608912866	BP		0.00769064853827
cytoplasmic microtubule	62	GO:0005881	GO:0005881	0.618113375159625	0.000652849873221	CC		0.007727471716773
lysine-acetylated histone binding	19	GO:0070577	GO:0070577	0.71279155466921	0.000661711642612	MF	acetylation-dependent protein binding	0.007818766388223
regulation of DNA biosynthetic process	106	GO:2000278	GO:2000278	0.590187141771977	0.000676005696477	BP		0.007963307221081
exit from mitosis	28	GO:0010458	GO:0010458	0.674999754692728	0.000676284392269	BP		0.007963307221081
spindle midzone assembly	10	GO:0051255	GO:0051255	0.792364684091377	0.000683690502304	BP		0.008036610636758
nucleobase-containing compound kinase activity	36	GO:0019205	GO:0019205	0.654071121496041	0.000691382510362	MF		0.008103328240936
response to X-ray	28	GO:0010165	GO:0010165	0.674644059148489	0.000691747532763	BP		0.008103328240936
condensed nuclear chromosome, centromeric region	17	GO:0000780	GO:0000780	0.723872582663814	0.000697852201913	CC		0.008160793962574
methylation-dependent chromatin silencing	18	GO:0006346	GO:0006346	0.717295475171788	0.000707754487115	BP		0.008262396293836
nucleotide-excision repair, DNA incision	39	GO:0033683	GO:0033683	0.647643873860536	0.000712289241336	BP		0.008288878381419
ATP-dependent microtubule motor activity	12	GO:1990939	GO:1990939	0.765917667238422	0.000712458691321	MF		0.008288878381419
damaged DNA binding	59	GO:0003684	GO:0003684	0.619842221682969	0.000730768499478	MF		0.008475001537565
negative regulation of transcription elongation from RNA polymerase II promoter	10	GO:0034244	GO:0034244	0.790601632709062	0.000730947091177	BP		0.008475001537565
organelle transport along microtubule	72	GO:0072384	GO:0072384	0.608413709955219	0.000739680701793	BP		0.008561678327218
histone H4 acetylation	63	GO:0043967	GO:0043967	0.615833453550336	0.000741769408781	BP		0.008571277752404
organelle membrane fusion	71	GO:0090174	GO:0090174	0.609055961561599	0.000748255279181	BP		0.008631568525606
cellular response to fibroblast growth factor stimulus	129	GO:0044344	GO:0044344	0.580940140969673	0.000761334124316	BP		0.008767580457011
protein localization to microtubule organizing center	31	GO:1905508	GO:1905508	0.664359669884495	0.000771282548896	BP		0.008867143628021
apoptotic DNA fragmentation	20	GO:0006309	GO:0006309	0.704479302533123	0.000774157090049	BP		0.008885182385962
positive regulation of response to DNA damage stimulus	92	GO:2001022	GO:2001022	0.595331973544101	0.000795853784411	BP		0.009118822991081
cortical actin cytoskeleton organization	31	GO:0030866	GO:0030866	0.663767961776099	0.000802065846808	BP		0.009174554879617
pyrimidine nucleoside metabolic process	50	GO:0006213	GO:0006213	0.628977092935269	0.000805972667722	BP		0.009203775128378
histone H4-K20 methylation	10	GO:0034770	GO:0034770	0.787946765452425	0.000807810453147	BP		0.009209309789149
centrosome localization	24	GO:0051642	GO:0051642	0.685816223763419	0.000814458670112	BP		0.009269574763855
negative regulation of binding	159	GO:0051100	GO:0051100	0.572514921196207	0.00081615179165	BP		0.009273337385593
response to hydroxyurea	12	GO:0072710	GO:0072710	0.762555746140652	0.000818505097382	BP		0.009284576154638
serine/threonine protein kinase complex	65	GO:1902554	GO:1902554	0.612960706832074	0.000822911156166	CC		0.009319023841711
ATPase complex	92	GO:1904949	GO:1904949	0.594957031660093	0.000830423156632	CC		0.009383929693824
histone acetylation	147	GO:0016573	GO:0016573	0.575255808694669	0.000831400177105	BP		0.009383929693824
anterograde axonal transport	43	GO:0008089	GO:0008089	0.638604267403484	0.000834092494339	BP		0.009398730987531
iron-sulfur cluster binding	56	GO:0051536	GO:0051536	0.621464455302457	0.000837429515194	MF	metal cluster binding	0.00942073600068
fibroblast growth factor receptor signaling pathway	102	GO:0008543	GO:0008543	0.59000859577521	0.000850912426416	BP		0.009552265868066
cortical cytoskeleton	81	GO:0030863	GO:0030863	0.600920351391421	0.000851928501604	CC		0.009552265868066
ATPase regulator activity	31	GO:0060590	GO:0060590	0.662644381210719	0.000863652875227	MF		0.009667798468411
exosome (RNase complex)	24	GO:0000178	GO:0000178	0.684357046396118	0.000886198846044	CC	exoribonuclease complex	0.009903890552011
tRNA 5'-leader removal	11	GO:0001682	GO:0001682	0.7718416325716	0.000898433932172	BP		0.01002416613502
regulation of phosphoprotein phosphatase activity	111	GO:0043666	GO:0043666	0.585800293247102	0.000906216969114	BP		0.010094456124047
cohesin complex	12	GO:0008278	GO:0008278	0.75991423670669	0.000911815832353	CC		0.010140226397045
cyclin-dependent protein kinase holoenzyme complex	29	GO:0000307	GO:0000307	0.66724540600973	0.000914466321306	CC		0.010153112206868
pseudouridine synthase activity	10	GO:0009982	GO:0009982	0.784516704397338	0.000918130993634	MF		0.010177197952235
negative regulation of protein binding	101	GO:0032091	GO:0032091	0.589721998570146	0.0009271988484	BP		0.010261000588961
regulation of telomere capping	26	GO:1904353	GO:1904353	0.675962661059838	0.000950689855013	BP		0.010491581660616
protein localization to chromatin	28	GO:0071168	GO:0071168	0.669566198620392	0.000951117526389	BP		0.010491581660616
mitochondrial RNA metabolic process	34	GO:0000959	GO:0000959	0.653570519116738	0.000973405856726	BP		0.010711407417997
DNA strand elongation	16	GO:0022616	GO:0022616	0.723710623841878	0.000974193533902	BP		0.010711407417997
cyclin-dependent protein kinase activity	15	GO:0097472	GO:0097472	0.730858266996065	0.000982211469575	MF		0.010782147196654
response to fibroblast growth factor	136	GO:0071774	GO:0071774	0.576968009541371	0.000985026795304	BP		0.010795639885408
acetylgalactosaminyltransferase activity	32	GO:0008376	GO:0008376	0.657984799038131	0.000992951220297	MF		0.010864993577715
stress fiber	56	GO:0001725	GO:0001725	0.619483468840017	0.000996436085247	CC	contractile actin filament bundle	0.010877291686314
protein acetylation	188	GO:0006473	GO:0006473	0.565488073196572	0.000999815639365	BP		0.010877291686314
response to ionizing radiation	144	GO:0010212	GO:0010212	0.574708913199012	0.00100041718843	BP		0.010877291686314
positive regulation of cell cycle G2/M phase transition	27	GO:1902751	GO:1902751	0.671838115588116	0.001000467910025	BP		0.010877291686314
cyclin-dependent protein serine/threonine kinase regulator activity	18	GO:0016538	GO:0016538	0.710157030529053	0.00101221444382	MF		0.01097374576476
regulation of protein dephosphorylation	132	GO:0035304	GO:0035304	0.577906879238598	0.001012716589925	BP		0.01097374576476
isomerase activity	122	GO:0016853	GO:0016853	0.580997659698651	0.001014176621515	MF		0.01097374576476
phosphatase inhibitor activity	38	GO:0019212	GO:0019212	0.644281936541126	0.001045902491702	MF		0.01129906723575
meiosis I cell cycle process	91	GO:0061982	GO:0061982	0.593369447881037	0.001050130267407	BP		0.011326761648136
axoneme part	31	GO:0044447	GO:0044447	0.659442065792623	0.001063821488876	CC		0.011456280147614
histone deubiquitination	23	GO:0016578	GO:0016578	0.684973669441028	0.001068647519642	BP		0.011490071119561
aerobic respiration	64	GO:0009060	GO:0009060	0.610940404875026	0.001078931009899	BP		0.011582341409106
internal protein amino acid acetylation	156	GO:0006475	GO:0006475	0.57118933776823	0.001093847545325	BP		0.011723978572416
establishment of mitotic spindle localization	28	GO:0040001	GO:0040001	0.666963488465652	0.001116236407758	BP		0.011945133633965
tRNA aminoacylation for protein translation	42	GO:0006418	GO:0006418	0.636086693185353	0.001141868656183	BP		0.012200248153813
regulation of single stranded viral RNA replication via double stranded DNA intermediate	15	GO:0045091	GO:0045091	0.727266904565834	0.001154142990024	BP		0.012297242340025
ATP-dependent RNA helicase activity	25	GO:0004004	GO:0004004	0.676093943139679	0.001154560366629	MF		0.012297242340025
protein O-linked glycosylation via serine	10	GO:0018242	GO:0018242	0.778081909857996	0.001163214253534	BP		0.012370056577423
cell aging	104	GO:0007569	GO:0007569	0.586494643587442	0.001165058830026	BP		0.012370343833319
regulation of early endosome to late endosome transport	17	GO:2000641	GO:2000641	0.713206023658606	0.00117006071456	BP		0.012404101593923
negative regulation of telomere maintenance	36	GO:0032205	GO:0032205	0.646156430638597	0.001206953500151	BP		0.012757623241181
mRNA cap binding complex	12	GO:0005845	GO:0005845	0.752938822184105	0.001207156827405	CC		0.012757623241181
plasma membrane tubulation	17	GO:0097320	GO:0097320	0.711930235374864	0.001242868286698	BP		0.013114669084137
protein monoubiquitination	65	GO:0006513	GO:0006513	0.608493214539214	0.00125069322003	BP		0.013176808135484
MLL1/2 complex	29	GO:0044665	GO:0044665	0.661873315300036	0.001278223469179	CC	MLL1 complex	0.013446041624784
hormone activity	101	GO:0005179	GO:0005179	0.58689373010199	0.001287042046358	MF		0.013502384714855
actin-mediated cell contraction	110	GO:0070252	GO:0070252	0.583285713388635	0.001287547411099	BP		0.013502384714855
positive regulation by host of viral process	13	GO:0044794	GO:0044794	0.741188206606074	0.00130211177896	BP		0.013634111950154
cis-trans isomerase activity	28	GO:0016859	GO:0016859	0.664333794511004	0.001309380758457	MF		0.013689163505465
positive regulation of binding	181	GO:0051099	GO:0051099	0.564938795452785	0.001316999158798	BP		0.013747693672971
transcription factor TFIID complex	32	GO:0005669	GO:0005669	0.65358553761594	0.001322576669307	CC		0.013784773064781
regulation of cell projection assembly	164	GO:0060491	GO:0060491	0.568048070240114	0.001342698499777	BP		0.013973097843246
actin filament bundle	59	GO:0032432	GO:0032432	0.613018461136415	0.001345386732441	CC		0.013979697864108
internal peptidyl-lysine acetylation	151	GO:0018393	GO:0018393	0.570833769145936	0.001352277020205	BP		0.01402987408463
regulation of mRNA 3'-end processing	26	GO:0031440	GO:0031440	0.669586302715895	0.001382631232937	BP		0.014322965253226
protein phosphorylated amino acid binding	44	GO:0045309	GO:0045309	0.630364186456464	0.001390786314196	MF		0.014385549626774
single stranded viral RNA replication via double stranded DNA intermediate	16	GO:0039692	GO:0039692	0.715839681559262	0.001399508658877	BP		0.014453802628702
cortical cytoskeleton organization	35	GO:0030865	GO:0030865	0.645806172936464	0.001420545544389	BP		0.014648837841076
PcG protein complex	42	GO:0031519	GO:0031519	0.633055050827481	0.00142880194756	CC		0.014711688434333
mitotic sister chromatid cohesion	23	GO:0007064	GO:0007064	0.6792896122661	0.001459665912835	BP		0.014990579865091
DNA damage checkpoint	132	GO:0000077	GO:0000077	0.575117658773833	0.001460293042985	BP		0.014990579865091
tRNA modification	61	GO:0006400	GO:0006400	0.610168764657155	0.001468218064548	BP		0.015049235161617
regulation of mitochondrial translation	25	GO:0070129	GO:0070129	0.671825298722703	0.001472484762624	BP		0.015070272623186
histone mRNA metabolic process	24	GO:0008334	GO:0008334	0.675164228982124	0.001488693255289	BP		0.015213282725967
growth factor activity	145	GO:0008083	GO:0008083	0.571450606229914	0.001511058850038	MF		0.015418690454815
regulation of adherens junction organization	67	GO:1903391	GO:1903391	0.604783931581761	0.001517405003198	BP		0.015460267143364
gamma-tubulin binding	22	GO:0043015	GO:0043015	0.682489155197703	0.001524599176076	MF		0.015510346774846
phosphotransferase activity, phosphate group as acceptor	33	GO:0016776	GO:0016776	0.648877118026493	0.001542484187041	MF		0.015654757252337
spindle elongation	10	GO:0051231	GO:0051231	0.770220209919737	0.00154339437501	BP		0.015654757252337
non-membrane spanning protein tyrosine kinase activity	37	GO:0004715	GO:0004715	0.640557258289217	0.001548985869265	MF		0.015688092003303
ribonuclease P activity	11	GO:0004526	GO:0004526	0.757322123540565	0.001562564597451	MF		0.015786643560515
DNA replication initiation	30	GO:0006270	GO:0006270	0.655908955599826	0.001563355533322	BP		0.015786643560515
RNA polymerase II complex binding	27	GO:0000993	GO:0000993	0.664176332926333	0.001577011647637	MF		0.015900950035289
axo-dendritic transport	61	GO:0008088	GO:0008088	0.609325731362419	0.001580892810362	BP		0.01591650364989
histone kinase activity	14	GO:0035173	GO:0035173	0.727352932526884	0.001613293622574	MF		0.016204315921535
5'-3' RNA polymerase activity	22	GO:0034062	GO:0034062	0.681403114564804	0.001614241286336	MF	RNA polymerase activity	0.016204315921535
negative regulation of cellular senescence	18	GO:2000773	GO:2000773	0.700391241677534	0.001624238689923	BP		0.016280660564973
negative regulation of RNA catabolic process	49	GO:1902369	GO:1902369	0.62154634862612	0.001629078460647	BP		0.016305158828183
actin filament bundle organization	132	GO:0061572	GO:0061572	0.574245568797627	0.001633530236764	BP		0.016318842500135
U4/U6 x U5 tri-snRNP complex	25	GO:0046540	GO:0046540	0.669957423430847	0.001635241049822	CC	spliceosomal tri-snRNP complex	0.016318842500135
kinesin complex	12	GO:0005871	GO:0005871	0.745077186963979	0.001643280348639	CC		0.016375060106643
transcriptional repressor complex	78	GO:0017053	GO:0017053	0.596075645355403	0.001687372625091	CC		0.016789851003466
negative regulation of proteasomal ubiquitin-dependent protein catabolic process	34	GO:0032435	GO:0032435	0.64521364101196	0.001696825912143	BP		0.01685926592415
DNA double-strand break processing	23	GO:0000729	GO:0000729	0.676014711677394	0.001740382909164	BP		0.01726683102007
regulation of defense response to virus by virus	30	GO:0050690	GO:0050690	0.653788555334203	0.001779531574051	BP		0.017629536962142
regulation of telomere maintenance via telomerase	53	GO:0032210	GO:0032210	0.615711759803298	0.001791494615226	BP		0.017709167613474
positive regulation of cellular amide metabolic process	136	GO:0034250	GO:0034250	0.572427818958183	0.001794701334575	BP		0.017709167613474
A band	31	GO:0031672	GO:0031672	0.651149287734135	0.001795375500044	CC		0.017709167613474
methyltransferase activity	186	GO:0008168	GO:0008168	0.561887876663284	0.001836121134147	MF		0.018063258808865
establishment of epithelial cell polarity	29	GO:0090162	GO:0090162	0.655883007802322	0.00183658170669	BP		0.018063258808865
termination of RNA polymerase I transcription	31	GO:0006363	GO:0006363	0.650648441170474	0.001851624302406	BP		0.018179859695051
negative regulation of ubiquitin-protein transferase activity	16	GO:0051444	GO:0051444	0.709560085100542	0.001853779404697	BP		0.018179859695051
positive regulation of protein localization to membrane	119	GO:1905477	GO:1905477	0.576955111599519	0.001889450719235	BP		0.018503023877857
peptidyl-threonine modification	106	GO:0018210	GO:0018210	0.581398788001975	0.001911440740939	BP		0.018691473682224
transferase activity, transferring one-carbon groups	196	GO:0016741	GO:0016741	0.560033623622474	0.001915562032266	MF		0.018704899844482
negative regulation of viral life cycle	80	GO:1903901	GO:1903901	0.593423864341352	0.001947319172571	BP		0.018987756860339
regulation of G protein-coupled receptor signaling pathway	145	GO:0008277	GO:0008277	0.56950751877904	0.001958105322231	BP		0.01906561491145
ligase activity	134	GO:0016874	GO:0016874	0.572251693858942	0.001964313619632	MF		0.019084947734382
annealing activity	10	GO:0097617	GO:0097617	0.763339507443233	0.001965699142198	MF		0.019084947734382
ESCRT complex	25	GO:0036452	GO:0036452	0.666422194753468	0.001988859513085	CC		0.019265990182729
intermediate filament organization	22	GO:0045109	GO:0045109	0.677377274287676	0.001990007507855	BP		0.019265990182729
DNA-directed DNA polymerase activity	20	GO:0003887	GO:0003887	0.685961419647148	0.001995950534118	MF		0.019273217235767
mitotic recombination	18	GO:0006312	GO:0006312	0.696002165938332	0.001996417594948	BP		0.019273217235767
microtubule plus-end	16	GO:0035371	GO:0035371	0.707715668107886	0.002010653365267	CC		0.019383154113327
regulation of plasma membrane bounded cell projection assembly	162	GO:0120032	GO:0120032	0.565567323533817	0.002021986808576	BP		0.019464840479724
protein localization to cytoskeleton	50	GO:0044380	GO:0044380	0.617442388388251	0.002041419810215	BP		0.019624157102156
negative regulation of cell aging	24	GO:0090344	GO:0090344	0.669250268946417	0.002053749483775	BP		0.019684632664163
negative regulation of cell division	17	GO:0051782	GO:0051782	0.701045661916105	0.002054271391799	BP		0.019684632664163
S-adenosylmethionine-dependent methyltransferase activity	136	GO:0008757	GO:0008757	0.571363878746433	0.00205638757335	MF		0.019684632664163
regulation of nuclease activity	19	GO:0032069	GO:0032069	0.690128327408307	0.002059647512791	BP		0.019688147432658
mRNA modification	18	GO:0016556	GO:0016556	0.695174685977075	0.002074707460127	BP		0.019786726350839
attachment of spindle microtubules to kinetochore	29	GO:0008608	GO:0008608	0.653815179235496	0.002075774700926	BP		0.019786726350839
regulation of microtubule polymerization	46	GO:0031113	GO:0031113	0.621884745681626	0.002124835038351	BP		0.020226052127293
telomerase RNA binding	21	GO:0070034	GO:0070034	0.680158621185671	0.002133307557401	MF		0.020278339714626
chromocenter	14	GO:0010369	GO:0010369	0.720549744635382	0.002137321625224	CC		0.020288160364402
protein transport within lipid bilayer	22	GO:0032594	GO:0032594	0.675726367693412	0.002165850345505	BP		0.020530004805937
chemoattractant activity	27	GO:0042056	GO:0042056	0.658625864875865	0.002168832420727	MF		0.020530004805937
endoribonuclease complex	27	GO:1902555	GO:1902555	0.658155270655271	0.002227282278753	CC	endonuclease complex	0.021054004429432
protein polyglutamylation	11	GO:0018095	GO:0018095	0.747255762897914	0.002258874935368	BP		0.021323027475892
positive regulation of DNA-dependent DNA replication	11	GO:2000105	GO:2000105	0.747049945115258	0.002275666600542	BP		0.021434782684141
protein phosphatase inhibitor activity	33	GO:0004864	GO:0004864	0.642716154259373	0.002279239469346	MF		0.021434782684141
cell cortex region	31	GO:0099738	GO:0099738	0.647231160634347	0.002280162013417	CC		0.021434782684141
protein-DNA complex disassembly	20	GO:0032986	GO:0032986	0.683109082172033	0.002293834410076	BP		0.021533568268936
meiosis I	88	GO:0007127	GO:0007127	0.58731323163353	0.00233714405949	BP		0.021909920756045
actin filament bundle assembly	131	GO:0051017	GO:0051017	0.571637229265325	0.002346269500459	BP		0.021965213507735
ribonuclease P complex	13	GO:0030677	GO:0030677	0.726272286791019	0.00236587173641	CC		0.022095648649362
regulation of Wnt signaling pathway, planar cell polarity pathway	14	GO:2000095	GO:2000095	0.718040211349756	0.002366695249102	BP		0.022095648649362
site of double-strand break	51	GO:0035861	GO:0035861	0.614226207819396	0.002395630147949	CC		0.022327764637962
axonemal dynein complex assembly	25	GO:0070286	GO:0070286	0.66298310671611	0.002398118711482	BP		0.022327764637962
positive regulation of cyclin-dependent protein serine/threonine kinase activity	28	GO:0045737	GO:0045737	0.653888610873981	0.002416211804874	BP		0.022465488448046
cellular response to hydroxyurea	11	GO:0072711	GO:0072711	0.74531608621894	0.002421674657522	BP		0.022484996116141
nuclear cyclin-dependent protein kinase holoenzyme complex	11	GO:0019908	GO:0019908	0.745278664803912	0.0024249173008	CC		0.022484996116141
dynein complex binding	22	GO:0070840	GO:0070840	0.673404487719627	0.002437024674977	MF		0.0225665169223
modification of synaptic structure	21	GO:0099563	GO:0099563	0.677386346547407	0.002448205572688	BP		0.022639248814834
non-canonical Wnt signaling pathway	145	GO:0035567	GO:0035567	0.567728225625451	0.002469501645241	BP		0.022805194297846
maturation of 5.8S rRNA	12	GO:0000460	GO:0000460	0.734276729559748	0.002476816866088	BP		0.022841755542807
ubiquitin-protein transferase regulator activity	16	GO:0055106	GO:0055106	0.702851554457484	0.002483812750907	MF		0.022875276837177
tRNA aminoacylation	45	GO:0043039	GO:0043039	0.620811748345788	0.002531767295496	BP		0.023285416504255
protein localization to cilium	42	GO:0061512	GO:0061512	0.625007775540605	0.002537297414062	BP		0.023304785695151
neuropeptide receptor binding	23	GO:0071855	GO:0071855	0.668715594139212	0.002550522753102	MF		0.023394687139642
negative regulation of mitotic sister chromatid segregation	35	GO:0033048	GO:0033048	0.636458415141758	0.002610338515387	BP		0.023911122389941
positive regulation of DNA biosynthetic process	66	GO:2000573	GO:2000573	0.599456795070045	0.002615020652348	BP		0.023921815268653
G0 to G1 transition	45	GO:0045023	GO:0045023	0.62012561316646	0.002659557401038	BP		0.024296574055654
negative regulation of telomere maintenance via telomere lengthening	27	GO:1904357	GO:1904357	0.654759361009361	0.002693181385523	BP		0.024570767439508
multimeric ribonuclease P complex	10	GO:0030681	GO:0030681	0.754105783082939	0.002697075357201	CC	ribonuclease P RNA binding	0.024573353254501
negative regulation of sister chromatid segregation	37	GO:0033046	GO:0033046	0.632190953840438	0.00270302985915	BP		0.02459468077724
early endosome to late endosome transport	37	GO:0045022	GO:0045022	0.632105507569425	0.00271804247506	BP		0.024698260460963
ATPase activator activity	20	GO:0001671	GO:0001671	0.678839156998696	0.002815379016961	MF		0.025548626119251
positive regulation of actin filament polymerization	82	GO:0030838	GO:0030838	0.588485887961258	0.002822036512709	BP		0.025574940752995
alpha-tubulin binding	33	GO:0043014	GO:0043014	0.639080790035854	0.002851161422857	MF		0.025804527452078
formation of extrachromosomal circular DNA	15	GO:0001325	GO:0001325	0.706071003751487	0.002862012328924	BP	t-circle formation, telomere maintenance via telomere trimming	0.025868334542707
response to nerve growth factor	46	GO:1990089	GO:1990089	0.617740541736559	0.002874192579539	BP		0.025896148745686
mitochondrial membrane organization	115	GO:0007006	GO:0007006	0.574642488042877	0.002874291617233	BP		0.025896148745686
phosphatidylinositol-5-phosphate binding	17	GO:0010314	GO:0010314	0.693467641002867	0.00287650432732	MF		0.025896148745686
modification of postsynaptic structure	16	GO:0099010	GO:0099010	0.699381476906183	0.002880608707643	BP		0.025898841300156
U1 snRNP	10	GO:0005685	GO:0005685	0.751828222542361	0.002911707215506	CC		0.026105100374961
nuclear transcriptional repressor complex	26	GO:0090568	GO:0090568	0.656260400543073	0.002911991341183	CC		0.026105100374961
establishment of mitotic spindle orientation	24	GO:0000132	GO:0000132	0.662609581359152	0.002915056756534	BP		0.026105100374961
positive regulation of G2/M transition of mitotic cell cycle	24	GO:0010971	GO:0010971	0.662469385886608	0.00293631961431	BP		0.026157834121838
ciliary base	29	GO:0097546	GO:0097546	0.647820134444387	0.002937389396391	CC		0.026157834121838
midbrain development	89	GO:0030901	GO:0030901	0.584544013044806	0.002940240363605	BP		0.026157834121838
ADP binding	35	GO:0043531	GO:0043531	0.634559805230503	0.002941515435844	MF		0.026157834121838
negative regulation of chromosome segregation	38	GO:0051985	GO:0051985	0.629144343434709	0.002943045063754	BP		0.026157834121838
histone-serine phosphorylation	11	GO:0035404	GO:0035404	0.73980266440475	0.002944005427171	BP		0.026157834121838
cellular response to nerve growth factor stimulus	43	GO:1990090	GO:1990090	0.621291925704198	0.002970260285322	BP		0.026356703392314
intermediate filament cytoskeleton organization	42	GO:0045104	GO:0045104	0.622568711224607	0.003001806722925	BP		0.026580572840545
regulation of dopaminergic neuron differentiation	10	GO:1904338	GO:1904338	0.750902106057488	0.003003300104963	BP		0.026580572840545
vesicle fusion	66	GO:0006906	GO:0006906	0.59783531896334	0.003007292080694	BP		0.026581337534032
regulation of protein ubiquitination	190	GO:0031396	GO:0031396	0.55783076152561	0.003041852184228	BP		0.026851940292942
regulation of proteasomal protein catabolic process	165	GO:0061136	GO:0061136	0.561949967011678	0.003063917802033	BP		0.02701168984538
euchromatin	32	GO:0000791	GO:0000791	0.639855290278255	0.003095686163851	CC		0.027221976123058
pigment granule localization	25	GO:0051875	GO:0051875	0.658189809092158	0.003095769838267	BP		0.027221976123058
N-acetyltransferase activity	67	GO:0008080	GO:0008080	0.596696270712553	0.003115223952095	MF		0.027349505880154
Golgi organization	94	GO:0007030	GO:0007030	0.581699749402133	0.003119177225086	BP		0.027349505880154
unconventional myosin complex	10	GO:0016461	GO:0016461	0.749735885298758	0.003122328249909	CC		0.027349505880154
negative regulation of organelle assembly	38	GO:1902116	GO:1902116	0.627695518954097	0.003233003656431	BP		0.028282548696233
pyrimidine nucleoside triphosphate metabolic process	18	GO:0009147	GO:0009147	0.685222046811724	0.003260191979404	BP		0.028483782556902
negative regulation of mitotic metaphase/anaphase transition	32	GO:0045841	GO:0045841	0.638957832360014	0.00326504729896	BP	negative regulation of mitotic sister chromatid separation	0.028489630662467
viral latency	11	GO:0019042	GO:0019042	0.736709160762399	0.003279660296257	BP		0.028580496768664
inner mitochondrial membrane organization	35	GO:0007007	GO:0007007	0.632755438624048	0.003290868867036	BP		0.028641500650954
dynactin binding	12	GO:0034452	GO:0034452	0.726106346483705	0.003343600391822	MF		0.029036726689497
transcription initiation from RNA polymerase I promoter	35	GO:0006361	GO:0006361	0.632492342731485	0.003344812477897	BP		0.029036726689497
establishment of spindle orientation	28	GO:0051294	GO:0051294	0.648025767075839	0.00335771169877	BP		0.02911157429532
protein kinase A binding	45	GO:0051018	GO:0051018	0.616757591038983	0.003375309827961	MF		0.02922691945178
demethylation	61	GO:0070988	GO:0070988	0.600255505673264	0.003398014749337	BP		0.029386135176604
regulation of G0 to G1 transition	43	GO:0070316	GO:0070316	0.619250006395988	0.003417965129677	BP		0.029521155675866
vesicle cytoskeletal trafficking	43	GO:0099518	GO:0099518	0.619170056540538	0.003436667803669	BP		0.029612870873641
regulation of microtubule depolymerization	23	GO:0031114	GO:0031114	0.662828534922322	0.003437285922741	BP		0.029612870873641
vesicle-mediated transport between endosomal compartments	40	GO:0098927	GO:0098927	0.623389702344126	0.003472056696493	BP		0.029874611727346
regulation of ubiquitin protein ligase activity	22	GO:1904666	GO:1904666	0.666192304091377	0.003486296076383	BP		0.029899660677988
regulation of dendritic spine development	69	GO:0060998	GO:0060998	0.593989270690457	0.003487565138694	BP		0.029899660677988
axo-dendritic protein transport	12	GO:0099640	GO:0099640	0.724934248141795	0.003488147308011	BP		0.029899660677988
protein serine/threonine kinase inhibitor activity	30	GO:0030291	GO:0030291	0.642217947837237	0.003514095674467	MF		0.030050192393836
cytoplasmic translational initiation	27	GO:0002183	GO:0002183	0.649893162393162	0.003514539104539	BP		0.030050192393836
negative regulation of metaphase/anaphase transition of cell cycle	33	GO:1902100	GO:1902100	0.635243461133251	0.003592433307575	BP	negative regulation of chromosome separation	0.030677667617762
phosphatidylinositol-4-phosphate binding	24	GO:0070273	GO:0070273	0.658400856050722	0.003617569949019	MF		0.030853610367195
DNA dealkylation involved in DNA repair	10	GO:0006307	GO:0006307	0.745091582630171	0.003639599607027	BP		0.030980946785124
mitotic DNA integrity checkpoint	89	GO:0044774	GO:0044774	0.582365487064469	0.003643914650445	BP		0.030980946785124
dsRNA processing	47	GO:0031050	GO:0031050	0.613169832304135	0.003646156093871	BP	production of small RNA involved in gene silencing by RNA	0.030980946785124
aminoacyl-tRNA ligase activity	35	GO:0004812	GO:0004812	0.631000157072175	0.00366607479505	MF	ligase activity, forming carbon-oxygen bonds	0.031111352936545
histone H3-K27 methylation	20	GO:0070734	GO:0070734	0.673093293059655	0.003685592766638	BP		0.031238037820342
positive regulation of receptor-mediated endocytosis	49	GO:0048260	GO:0048260	0.610624935075144	0.003704332400143	BP		0.031357818800214
mitotic spindle midzone	11	GO:1990023	GO:1990023	0.733054335894621	0.003720298487985	CC		0.031453852806492
endosome organization	72	GO:0007032	GO:0007032	0.590989206567918	0.00381735618789	BP		0.032234399770199
endodeoxyribonuclease activity, producing 5'-phosphomonoesters	10	GO:0016888	GO:0016888	0.743506894422721	0.003832953846593	MF		0.032326002329506
actin cytoskeleton reorganization	85	GO:0031532	GO:0031532	0.583707723883927	0.003843633390072	BP		0.032375951550535
regulation of proteasomal ubiquitin-dependent protein catabolic process	110	GO:0032434	GO:0032434	0.573561197385194	0.003879139140603	BP		0.032634636577189
negative regulation of mRNA catabolic process	43	GO:1902373	GO:1902373	0.617251260009722	0.003914012503821	BP		0.032887369260502
dynein complex	39	GO:0030286	GO:0030286	0.623058592951362	0.003924548398026	CC		0.032935236001192
ciliary transition zone	61	GO:0035869	GO:0035869	0.598445297634767	0.003932565329436	CC		0.032961871468155
RNA stabilization	41	GO:0043489	GO:0043489	0.61987035242276	0.003965371204549	BP		0.033195961153953
NuRD complex	14	GO:0016581	GO:0016581	0.704678907176677	0.004006212093385	CC	CHD-type complex	0.03349665787172
regulation of cytokinesis	81	GO:0032465	GO:0032465	0.585163567906341	0.004052655352576	BP		0.03384340163145
mRNA methylation	14	GO:0080009	GO:0080009	0.704301496897393	0.00406459361438	BP		0.033901500170918
actin monomer binding	23	GO:0003785	GO:0003785	0.659389441505559	0.00407523182633	MF		0.033948626450428
intraciliary transport involved in cilium assembly	40	GO:0035735	GO:0035735	0.620906372447927	0.004082348967962	BP		0.033966341168646
amino acid activation	46	GO:0043038	GO:0043038	0.612575237035907	0.004137510424435	BP		0.034383267336638
morphogenesis of a polarized epithelium	139	GO:0001738	GO:0001738	0.564916505333939	0.004163656633469	BP		0.034558350057796
regulation of methylation-dependent chromatin silencing	13	GO:0090308	GO:0090308	0.711250804910747	0.004179400812375	BP		0.034646774578589
intraciliary transport	48	GO:0042073	GO:0042073	0.610048834170163	0.004185651983596	BP		0.034656383698726
substrate-dependent cell migration, cell extension	10	GO:0006930	GO:0006930	0.740509021060575	0.004224082763597	BP		0.034932086620952
retrograde vesicle-mediated transport, Golgi to ER	76	GO:0006890	GO:0006890	0.58739649412968	0.004240099887308	BP		0.035021990088612
negative regulation of mitotic nuclear division	45	GO:0045839	GO:0045839	0.613423188007152	0.004249941425429	BP		0.035060728898752
establishment of protein localization to mitochondrion	120	GO:0072655	GO:0072655	0.569604963019285	0.004265041664935	BP		0.035142704081774
nucleotide-excision repair, DNA gap filling	23	GO:0006297	GO:0006297	0.658353534026725	0.004287149998175	BP		0.035282155849552
regulation of type I interferon-mediated signaling pathway	29	GO:0060338	GO:0060338	0.641007906542676	0.004297707132722	BP		0.035326322156163
regulation of sister chromatid cohesion	21	GO:0007063	GO:0007063	0.665597640951204	0.004309951462774	BP		0.035384233601498
podosome	29	GO:0002102	GO:0002102	0.640842101273858	0.004336900168915	CC		0.035562581385103
positive regulation of histone H3-K4 methylation	16	GO:0051571	GO:0051571	0.689292944890536	0.004378966475108	BP		0.035848052770807
motile cilium	162	GO:0031514	GO:0031514	0.559783041273509	0.004382248002544	CC		0.035848052770807
postsynaptic specialization, intracellular component	21	GO:0099091	GO:0099091	0.664845726839411	0.004463399135764	CC		0.03646806064587
histone methyltransferase complex	65	GO:0035097	GO:0035097	0.593784496731749	0.004483471915111	CC		0.036588141312048
regulation of nuclear cell cycle DNA replication	16	GO:0033262	GO:0033262	0.688456523231075	0.004530043287405	BP		0.03692392169351
histone H4-K5 acetylation	16	GO:0043981	GO:0043981	0.688212030746002	0.004575074608082	BP	histone H4-K8 acetylation	0.037246360983976
oxidative demethylation	13	GO:0070989	GO:0070989	0.708115611573825	0.004687296814939	BP		0.038114387243098
negative regulation of viral genome replication	56	GO:0045071	GO:0045071	0.600344583501283	0.004714072631394	BP		0.03828637032132
cellular response to ionizing radiation	69	GO:0071479	GO:0071479	0.590380557069585	0.004737284530112	BP		0.038429032791347
photoreceptor connecting cilium	36	GO:0032391	GO:0032391	0.624823418016326	0.004783567972184	CC		0.038758290022245
single-stranded DNA binding	90	GO:0003697	GO:0003697	0.579051604546534	0.004801965648056	MF		0.038861091796277
negative regulation of DNA-templated transcription, elongation	12	GO:0032785	GO:0032785	0.715734705546026	0.004831958331748	BP		0.03905737340365
protein localization to presynapse	11	GO:1905383	GO:1905383	0.724634517513222	0.004943498893782	BP		0.039911569953829
maturation of SSU-rRNA	13	GO:0030490	GO:0030490	0.706600795937972	0.004951877998839	BP		0.03993185030817
regulation of ubiquitin-protein transferase activity	47	GO:0051438	GO:0051438	0.60875793848225	0.004960254308404	BP		0.039952060145556
protein transport along microtubule	15	GO:0098840	GO:0098840	0.691792478726324	0.005059677227071	BP	microtubule-based protein transport	0.040704684642368
DNA integration	11	GO:0015074	GO:0015074	0.723886089212653	0.005067904752519	BP		0.040722738778803
intermediate filament-based process	43	GO:0045103	GO:0045103	0.613256965231407	0.005102526035839	BP		0.040952585141418
viral RNA genome replication	28	GO:0039694	GO:0039694	0.640144044430053	0.005139410455277	BP		0.041200032460091
negative regulation of microtubule depolymerization	21	GO:0007026	GO:0007026	0.661530766363939	0.005199653367801	BP		0.041601716206993
I band	115	GO:0031674	GO:0031674	0.569246160501839	0.005201742652388	CC		0.041601716206993
cell-substrate adherens junction assembly	81	GO:0007045	GO:0007045	0.582310767958086	0.005249290781739	BP	focal adhesion assembly	0.041932714859762
pyrimidine nucleoside triphosphate biosynthetic process	16	GO:0009148	GO:0009148	0.684741953194702	0.005258692011872	BP		0.041958567213131
extrinsic apoptotic signaling pathway via death domain receptors	81	GO:0008625	GO:0008625	0.582169489679026	0.005315986188485	BP		0.042366044495114
nucleosome disassembly	18	GO:0006337	GO:0006337	0.673900443102173	0.005322962963094	BP		0.042372030323762
multivesicular body sorting pathway	22	GO:0071985	GO:0071985	0.657238710482789	0.005343249011557	BP		0.042483823332543
DNA secondary structure binding	23	GO:0000217	GO:0000217	0.653562088771599	0.005400982982337	MF		0.042892753999752
histone deacetylase complex	48	GO:0000118	GO:0000118	0.606111149322512	0.005505180892368	CC		0.043669302043654
histone H3-K4 trimethylation	15	GO:0080182	GO:0080182	0.689559886540397	0.005514367860145	BP		0.04369125454732
melanosome localization	24	GO:0032400	GO:0032400	0.649880404678523	0.005521263823915	BP		0.043695025099495
neuropeptide hormone activity	21	GO:0005184	GO:0005184	0.659912516427689	0.005596871393877	MF		0.044241935780173
myosin heavy chain binding	12	GO:0032036	GO:0032036	0.710920526014866	0.005705011993017	MF		0.045044445039989
regulation of histone H3-K9 methylation	23	GO:0051570	GO:0051570	0.652359003140561	0.00571825919869	BP		0.045096723182252
modification of morphology or physiology of other organism	152	GO:0035821	GO:0035821	0.559480794122473	0.005752762642566	BP		0.045305580923905
epithelial cilium movement	21	GO:0003351	GO:0003351	0.659284831603931	0.005758055759503	BP		0.045305580923905
hormone receptor binding	170	GO:0051427	GO:0051427	0.55621508921249	0.005799801313013	MF		0.0455786454041
Sin3 complex	12	GO:0016580	GO:0016580	0.710405946255003	0.005806154211777	CC	Sin3-type complex	0.0455786454041
regulation of centriole replication	19	GO:0046599	GO:0046599	0.66697375646695	0.005876210884799	BP		0.046075450785647
Rac guanyl-nucleotide exchange factor activity	14	GO:0030676	GO:0030676	0.694199645136309	0.00593831469762	MF		0.046508826043734
negative regulation of proteolysis involved in cellular protein catabolic process	67	GO:1903051	GO:1903051	0.58887072899963	0.005968089387352	BP		0.046640250268654
interstrand cross-link repair	50	GO:0036297	GO:0036297	0.602813510352893	0.005968800761681	BP		0.046640250268654
telomere capping	39	GO:0016233	GO:0016233	0.616232383691828	0.006019106831207	BP		0.046979404923388
proteasome accessory complex	23	GO:0022624	GO:0022624	0.65103053389537	0.006087724358854	CC		0.047460540648755
regulation of focal adhesion assembly	61	GO:0051893	GO:0051893	0.592842004049268	0.006096171073301	BP	regulation of cell-substrate junction assembly	0.047471662031969
cadherin binding involved in cell-cell adhesion	17	GO:0098641	GO:0098641	0.675574306592919	0.00610310083426	MF		0.047471662031969
4 iron, 4 sulfur cluster binding	35	GO:0051539	GO:0051539	0.622388675096207	0.006120759612743	MF		0.04753941986017
positive regulation of viral transcription	41	GO:0050434	GO:0050434	0.613089509143407	0.006125781842105	BP		0.04753941986017
nucleoside metabolic process	113	GO:0009116	GO:0009116	0.568158834700244	0.006209014359565	BP		0.048130468942138
guanyl-nucleotide exchange factor activity	194	GO:0005085	GO:0005085	0.552116901042245	0.00624947894317	MF		0.048389025810257
proton-transporting ATP synthase complex	17	GO:0045259	GO:0045259	0.67490815131818	0.006269205149606	CC		0.048486602554796
regulation of protein deubiquitination	11	GO:0090085	GO:0090085	0.717225077337591	0.006303829255569	BP		0.048699048709881
cyclin-dependent protein serine/threonine kinase inhibitor activity	12	GO:0004861	GO:0004861	0.707112635791881	0.006491966371449	MF		0.050068951384152
non-motile cilium assembly	49	GO:1905515	GO:1905515	0.602614962617321	0.00649586894978	BP		0.050068951384152
protein localization to cell cortex	10	GO:0072697	GO:0072697	0.726541812444262	0.006556825361685	BP		0.050481621506367
DNA synthesis involved in DNA repair	50	GO:0000731	GO:0000731	0.601012588567105	0.006756648013605	BP		0.051961295345305
mRNA methyltransferase activity	11	GO:0008174	GO:0008174	0.714611815188105	0.006857321357602	MF		0.052675992279727
pyrimidine ribonucleoside metabolic process	34	GO:0046131	GO:0046131	0.621885117683437	0.006966558236147	BP		0.053447129488391
positive regulation of gene expression, epigenetic	47	GO:0045815	GO:0045815	0.603697796248061	0.006973725422149	BP		0.053447129488391
chromatin disassembly	20	GO:0031498	GO:0031498	0.658793849111004	0.006981266252598	BP		0.053447129488391
maintenance of organelle location	10	GO:0051657	GO:0051657	0.724236811415243	0.007035859681377	BP		0.053804562911741
positive regulation of DNA damage response, signal transduction by p53 class mediator	14	GO:0043517	GO:0043517	0.689303114370019	0.007096223403573	BP		0.054205271026622
execution phase of apoptosis	63	GO:0097194	GO:0097194	0.589333254645841	0.007125976702348	BP		0.054371521789442
mitotic spindle assembly checkpoint	30	GO:0007094	GO:0007094	0.629049025669208	0.007224384945554	BP	spindle checkpoint, spindle assembly checkpoint, mitotic spindle checkpoint	0.055060653907549
regulation of JUN kinase activity	83	GO:0043506	GO:0043506	0.577630433482413	0.007284922587125	BP		0.055459936384759
positive regulation of RNA splicing	28	GO:0033120	GO:0033120	0.633307330762513	0.007321071801535	BP		0.055657030697237
substantia nigra development	42	GO:0021762	GO:0021762	0.60888375976035	0.007327167132637	BP		0.055657030697237
maintenance of sister chromatid cohesion	12	GO:0034086	GO:0034086	0.703441966838193	0.007339946365971	BP	maintenance of mitotic sister chromatid cohesion	0.055691945336455
regulation of transposition	22	GO:0010528	GO:0010528	0.650254345722935	0.007355969247688	BP	negative regulation of transposition	0.055751366035373
protein phosphatase 1 binding	16	GO:0008157	GO:0008157	0.67590161965548	0.007427106912606	MF		0.0562279083951
peptide N-acetyltransferase activity	55	GO:0034212	GO:0034212	0.594974101043465	0.007441263574816	MF		0.056253215907129
H4 histone acetyltransferase activity	16	GO:0010485	GO:0010485	0.675824411502299	0.007449088274908	MF		0.056253215907129
heat shock protein binding	106	GO:0031072	GO:0031072	0.568513328460325	0.007455245481668	MF		0.056253215907129
RAGE receptor binding	11	GO:0050786	GO:0050786	0.711948657818581	0.007465113231198	MF		0.056265294187743
miRNA catabolic process	10	GO:0010587	GO:0010587	0.722178774782191	0.007489400774394	BP		0.056385908927572
mitochondrial electron transport, cytochrome c to oxygen	14	GO:0006123	GO:0006123	0.687577810236151	0.007549322851033	BP	aerobic electron transport chain	0.056774244557048
nuclear envelope reassembly	15	GO:0031468	GO:0031468	0.681032116387593	0.007602948529596	BP		0.057114423501583
positive regulation of cysteine-type endopeptidase activity involved in apoptotic process	115	GO:0043280	GO:0043280	0.565592328214002	0.007613626088238	BP		0.057131575696301
production of miRNAs involved in gene silencing by miRNA	44	GO:0035196	GO:0035196	0.605517806129784	0.007742044466663	BP		0.05803122757721
acetyltransferase activity	84	GO:0016407	GO:0016407	0.576431641400958	0.00777015190058	MF		0.05817783700258
positive regulation of mitochondrial translation	17	GO:0070131	GO:0070131	0.669389155799588	0.007806487808889	BP		0.058385665964061
snRNA transcription by RNA polymerase II	71	GO:0042795	GO:0042795	0.583001175972894	0.007830437249075	BP		0.058425616072256
negative regulation of viral process	94	GO:0048525	GO:0048525	0.57219038978465	0.007832126288384	BP		0.058425616072256
N-acyltransferase activity	84	GO:0016410	GO:0016410	0.576332318764919	0.007837582643839	MF		0.058425616072256
cellular response to X-ray	10	GO:0071481	GO:0071481	0.720484324620978	0.007881949918304	BP		0.058644575012359
mitochondrial proton-transporting ATP synthase complex	16	GO:0005753	GO:0005753	0.674336009882644	0.007884188383237	CC		0.058644575012359
endosome to lysosome transport	49	GO:0008333	GO:0008333	0.599629121149079	0.007938798584648	BP		0.058986313501219
negative regulation of response to DNA damage stimulus	78	GO:2001021	GO:2001021	0.579003129799187	0.007966121108486	BP		0.059124776733209
transcription elongation from RNA polymerase I promoter	30	GO:0006362	GO:0006362	0.627143871218887	0.007980653971539	BP		0.059168116481804
histone H2A ubiquitination	25	GO:0033522	GO:0033522	0.639140227990661	0.008024329551807	BP		0.059427189259628
snRNA metabolic process	77	GO:0016073	GO:0016073	0.579303122790373	0.008105294346078	BP		0.059961557955874
four-way junction DNA binding	16	GO:0000400	GO:0000400	0.673405222702628	0.008167505944366	MF		0.060356183992782
RNA polymerase III complex	10	GO:0005666	GO:0005666	0.719180901420045	0.008196113669154	CC		0.060501897648874
positive regulation of type I interferon production	74	GO:0032481	GO:0032481	0.580708628424469	0.008223130154525	BP		0.06058456960012
ISWI-type complex	11	GO:0031010	GO:0031010	0.708861391078735	0.008228677825165	CC		0.06058456960012
positive regulation of cytoplasmic translation	10	GO:2000767	GO:2000767	0.719002538245181	0.008239949152877	BP		0.06058456960012
DNA-directed 5'-3' RNA polymerase activity	19	GO:0003899	GO:0003899	0.658920778057169	0.008242919695814	MF		0.06058456960012
tRNA methyltransferase activity	24	GO:0008175	GO:0008175	0.64139714802353	0.00825351246603	MF		0.06059698580777
dendritic spine development	92	GO:0060996	GO:0060996	0.572333788262819	0.008294044170911	BP		0.060828948951747
mRNA stabilization	36	GO:0048255	GO:0048255	0.615343351736039	0.008325957989472	BP		0.060997276723728
postsynaptic density, intracellular component	18	GO:0099092	GO:0099092	0.662975419650552	0.00834079814879	CC		0.061040292688888
histone H3-K36 methylation	12	GO:0010452	GO:0010452	0.699508290451687	0.00835566120236	BP		0.061047466246743
peptide-lysine-N-acetyltransferase activity	50	GO:0061733	GO:0061733	0.59785512829332	0.00836152200957	MF		0.061047466246743
termination of RNA polymerase II transcription	31	GO:0006369	GO:0006369	0.62417892189453	0.008368687335911	BP		0.061047466246743
histone demethylase activity	22	GO:0032452	GO:0032452	0.647043035920482	0.008487309253142	MF		0.061846495478462
positive regulation of smoothened signaling pathway	31	GO:0045880	GO:0045880	0.623704668953718	0.008579345004243	BP		0.062450291014839
response to arsenic-containing substance	32	GO:0046685	GO:0046685	0.62138869804191	0.008750495775976	BP		0.063628070781296
DNA damage response, signal transduction by p53 class mediator resulting in transcription of p21 class mediator	17	GO:0006978	GO:0006978	0.666320804231095	0.008797288885519	BP		0.063900051392573
inner dynein arm assembly	13	GO:0036159	GO:0036159	0.690127835660977	0.008809643125156	BP		0.063921568347344
negative regulation of telomere maintenance via telomerase	20	GO:0032211	GO:0032211	0.653096038992243	0.00889357745033	BP		0.064461861690038
mitotic DNA damage checkpoint	85	GO:0044773	GO:0044773	0.574409209277422	0.008908210661678	BP		0.064499235918492
myofibril assembly	49	GO:0030239	GO:0030239	0.59773963237792	0.008991256694876	BP		0.064945182572961
phosphotyrosine residue binding	37	GO:0001784	GO:0001784	0.612430574904802	0.008991885458466	MF		0.064945182572961
protein deacetylation	78	GO:0006476	GO:0006476	0.577535428938007	0.008998428910712	BP		0.064945182572961
DNA endoreduplication	10	GO:0042023	GO:0042023	0.71579886121973	0.009063123349215	BP		0.065342815163935
protein localization to mitochondrion	124	GO:0070585	GO:0070585	0.561454367429236	0.009127892802134	BP		0.065740146467009
positive regulation of methylation-dependent chromatin silencing	10	GO:0090309	GO:0090309	0.715277491939357	0.009203690189035	BP		0.06621597825219
anaphase-promoting complex-dependent catabolic process	81	GO:0031145	GO:0031145	0.575748136573542	0.009263016099292	BP		0.066572426158166
sequence-specific mRNA binding	11	GO:1990825	GO:1990825	0.704888484183215	0.009311686043277	MF		0.066851619420402
tRNA-specific ribonuclease activity	13	GO:0004549	GO:0004549	0.688417730204474	0.009332014985955	MF		0.06692696943563
lateral element	14	GO:0000800	GO:0000800	0.681426512827048	0.009378756509863	CC		0.067191386111714
membrane disassembly	16	GO:0030397	GO:0030397	0.66930461190035	0.009524861984295	BP	nuclear envelope disassembly	0.068161407268714
tRNA methylation	24	GO:0030488	GO:0030488	0.638252763853602	0.009534184501883	BP		0.068161407268714
regulation of cardiac muscle cell differentiation	36	GO:2000725	GO:2000725	0.612777663238113	0.009614914782248	BP		0.068666432327369
cellular response to light stimulus	111	GO:0071482	GO:0071482	0.564357532442639	0.009647442177698	BP		0.068826510965839
meiotic chromosome segregation	67	GO:0045132	GO:0045132	0.582650795608733	0.009691768985903	BP		0.069070345254511
positive regulation of cardiac muscle hypertrophy	30	GO:0010613	GO:0010613	0.623191591674109	0.009774595308968	BP		0.069587756979951
regulation of inclusion body assembly	15	GO:0090083	GO:0090083	0.673931741238906	0.009844338036025	BP		0.070011039365923
positive regulation of telomere capping	17	GO:1904355	GO:1904355	0.66328071379547	0.009885990070235	BP		0.070233871000021
cysteine-type endopeptidase activity	56	GO:0004197	GO:0004197	0.59006115005358	0.009901216253429	MF		0.070238678686091
protein ADP-ribosylation	30	GO:0006471	GO:0006471	0.622909940234938	0.009914939698134	BP		0.070238678686091
vesicle-mediated transport to the plasma membrane	70	GO:0098876	GO:0098876	0.580558753776361	0.009926578247666	BP		0.070238678686091
cardiac muscle fiber development	10	GO:0048739	GO:0048739	0.712670645537491	0.009935517382273	BP		0.070238678686091
carboxy-terminal domain protein kinase complex	15	GO:0032806	GO:0032806	0.673666392167627	0.00993826734862	CC		0.070238678686091
regulation of RNA binding	11	GO:1905214	GO:1905214	0.702624488573995	0.009983041499206	BP		0.070481929920744
histone H2A monoubiquitination	17	GO:0035518	GO:0035518	0.662759901489765	0.010083858533703	BP		0.071039721877807
BLOC-1 complex	14	GO:0031083	GO:0031083	0.679309094117301	0.010092677482663	CC		0.071039721877807
inclusion body assembly	22	GO:0070841	GO:0070841	0.643076490965265	0.010093360425483	BP		0.071039721877807
maintenance of cell number	159	GO:0098727	GO:0098727	0.553445606289657	0.010124762035864	BP		0.071187118198441
guanosine-containing compound metabolic process	44	GO:1901068	GO:1901068	0.601101435867303	0.010183149654279	BP		0.071523752886502
positive regulation of extrinsic apoptotic signaling pathway via death domain receptors	14	GO:1902043	GO:1902043	0.678853260922842	0.010252429109602	BP		0.071936115999953
nucleoside monophosphate kinase activity	20	GO:0050145	GO:0050145	0.649581245280428	0.010289851910101	MF		0.072124337899224
axonemal dynein complex	15	GO:0005858	GO:0005858	0.672545521090676	0.010343723425758	CC		0.072396373211034
snRNA transcription	72	GO:0009301	GO:0009301	0.578902093619627	0.01034993698712	BP		0.072396373211034
spectrin binding	27	GO:0030507	GO:0030507	0.628540903540904	0.010402851430307	MF		0.072691793464752
transcriptionally active chromatin	20	GO:0035327	GO:0035327	0.649248300954212	0.010431534001142	CC		0.072817456832588
regulation of chromatin silencing	21	GO:0031935	GO:0031935	0.645603263961084	0.010454858637085	BP		0.072905499881146
positive regulation of cysteine-type endopeptidase activity	132	GO:2001056	GO:2001056	0.558269656090479	0.010485762635392	BP		0.072996291965365
establishment of pigment granule localization	22	GO:0051905	GO:0051905	0.642183940330181	0.010489329054089	BP		0.072996291965365
mitochondrial transcription	12	GO:0006390	GO:0006390	0.69240708976558	0.01050452539732	BP		0.073027374723352
DNA dealkylation	28	GO:0035510	GO:0035510	0.625830365115344	0.010605920143188	BP		0.073657033157688
mitochondrial tRNA processing	10	GO:0090646	GO:0090646	0.710214721822049	0.010670942681396	BP		0.074033064107627
base-excision repair	38	GO:0006284	GO:0006284	0.60786597740485	0.010715992931998	BP		0.074269906206904
smooth muscle cell apoptotic process	24	GO:0034390	GO:0034390	0.635606216667811	0.010743478745006	BP	regulation of smooth muscle cell apoptotic process	0.0743846554817
negative regulation of microtubule polymerization or depolymerization	32	GO:0031111	GO:0031111	0.617352284438337	0.010809321519473	BP		0.074764473843018
mRNA 3'-UTR binding	66	GO:0003730	GO:0003730	0.581790635505944	0.010824056417244	MF		0.074790383731735
pre-miRNA processing	13	GO:0031054	GO:0031054	0.683794111748002	0.010882246476691	BP		0.075081656080795
somatic diversification of immune receptors via somatic mutation	12	GO:0002566	GO:0002566	0.691275014293882	0.010888274250918	BP		0.075081656080795
positive regulation of transcription elongation from RNA polymerase II promoter	12	GO:0032968	GO:0032968	0.691154945683248	0.010929681772098	BP		0.07525967560547
regulation of translational initiation	69	GO:0006446	GO:0006446	0.579864875387076	0.010936206167178	BP		0.07525967560547
Golgi ribbon formation	12	GO:0090161	GO:0090161	0.690789022298456	0.011056722381704	BP		0.076012174272602
cellular component disassembly involved in execution phase of apoptosis	31	GO:0006921	GO:0006921	0.618742742157097	0.011077719083434	BP		0.076079673140115
apoptotic nuclear changes	29	GO:0030262	GO:0030262	0.62272195403878	0.011098755590766	BP		0.076147309022938
regulation of cytoplasmic transport	24	GO:1903649	GO:1903649	0.634848016663233	0.011113659421961	BP		0.076158212939712
regulation of skeletal muscle adaptation	13	GO:0014733	GO:0014733	0.68312907073714	0.011122724605065	BP		0.076158212939712
chaperone binding	90	GO:0051087	GO:0051087	0.569752362557771	0.011152804512428	MF		0.076287424634756
cyclosporin A binding	13	GO:0016018	GO:0016018	0.682917946606707	0.011200027119058	MF		0.076533518646893
lamellipodium assembly	58	GO:0030032	GO:0030032	0.586712425327704	0.011215640199937	BP		0.076563337212407
TFIID-class transcription factor complex binding	11	GO:0001094	GO:0001094	0.698582975750923	0.01128694350179	MF		0.076972883239658
modulation by host of viral process	24	GO:0044788	GO:0044788	0.634387374396301	0.0113439373511	BP		0.077230890928597
transposition	26	GO:0032196	GO:0032196	0.629117294353198	0.011347471485248	BP		0.077230890928597
regulation of translation in response to stress	18	GO:0043555	GO:0043555	0.654631981147185	0.011570212823759	BP		0.078626894351844
negative regulation of nuclear division	52	GO:0051784	GO:0051784	0.591073271413829	0.011577828915907	BP		0.078626894351844
regulation of dendritic spine morphogenesis	40	GO:0061001	GO:0061001	0.603782566852272	0.011587242879063	BP		0.078626894351844
nucleoside monophosphate phosphorylation	14	GO:0046940	GO:0046940	0.675186989638372	0.011619471203898	BP		0.078767052802517
positive regulation of Wnt signaling pathway	166	GO:0030177	GO:0030177	0.551088063508454	0.011693419135874	BP		0.07918946332215
glycosyl compound metabolic process	131	GO:1901657	GO:1901657	0.557238178922511	0.011938451187016	BP		0.080768487851718
DNA damage response, signal transduction resulting in transcription	18	GO:0042772	GO:0042772	0.653686289762891	0.011997211341704	BP		0.081085422434598
negative regulation of G0 to G1 transition	39	GO:0070317	GO:0070317	0.604249064106089	0.012156745084338	BP		0.082082149845241
outer dynein arm assembly	13	GO:0036158	GO:0036158	0.680326397905649	0.012187638220254	BP		0.082209183079336
nucleotide-excision repair complex	10	GO:0000109	GO:0000109	0.705392055978596	0.012253982000168	CC		0.082574852963506
regulation of non-motile cilium assembly	12	GO:1902855	GO:1902855	0.687449971412236	0.012276530238118	BP		0.082592691900119
response to leukemia inhibitory factor	94	GO:1990823	GO:1990823	0.567159347652792	0.012280899824114	BP	cellular response to leukemia inhibitory factor	0.082592691900119
protein C-terminus binding	186	GO:0008022	GO:0008022	0.547874886227286	0.012311991572437	MF		0.082720053940779
mitochondrial RNA processing	14	GO:0000963	GO:0000963	0.673348952563939	0.012362511816171	BP		0.082977569448578
cyclin binding	28	GO:0030332	GO:0030332	0.622214535927703	0.012611206960004	MF		0.084563423221465
miRNA metabolic process	30	GO:0010586	GO:0010586	0.618053170296078	0.012626887999934	BP		0.084585235952314
mitochondrion morphogenesis	19	GO:0070584	GO:0070584	0.648248504292032	0.012645096282415	BP		0.084623918680544
regulation of DNA methylation	23	GO:0044030	GO:0044030	0.634715737434771	0.012669357440841	BP		0.084702992870689
rRNA catabolic process	11	GO:0016075	GO:0016075	0.694454146292785	0.012769422787592	BP		0.085288215399758
histone mRNA catabolic process	11	GO:0071044	GO:0071044	0.694304460632671	0.01282619355291	BP		0.085583405216769
regulation of viral transcription	64	GO:0046782	GO:0046782	0.580666227707774	0.012857555104416	BP		0.085708638629439
pyrimidine ribonucleoside triphosphate metabolic process	14	GO:0009208	GO:0009208	0.672089284488928	0.01289520502184	BP		0.085862929995066
peptidyl-threonine phosphorylation	98	GO:0018107	GO:0018107	0.56522189247015	0.012905932616067	BP		0.085862929995066
negative regulation of cilium assembly	11	GO:1902018	GO:1902018	0.693237950304361	0.013237040431148	BP		0.08797978239687
response to antimetabolite	16	GO:0097329	GO:0097329	0.660185471141308	0.013268158758853	BP		0.088100574158783
establishment of planar polarity	123	GO:0001736	GO:0001736	0.557814973199511	0.013493434844897	BP	establishment of tissue polarity	0.089509081437006
chaperone cofactor-dependent protein refolding	13	GO:0051085	GO:0051085	0.677096198710032	0.013523590150685	BP		0.089621766860335
nucleolar large rRNA transcription by RNA polymerase I	13	GO:0042790	GO:0042790	0.676679228552427	0.013704931440685	BP	regulation of transcription of nucleolar large rRNA by RNA polymerase I	0.090735178390372
regulation of helicase activity	12	GO:0051095	GO:0051095	0.683750714694111	0.013762468197003	BP		0.091027559328282
telomere maintenance via recombination	12	GO:0000722	GO:0000722	0.683653516295026	0.01380351742264	BP		0.091210426775233
innate immune response in mucosa	13	GO:0002227	GO:0002227	0.676336151840475	0.0138557057231	BP		0.091466472503801
regulation of DNA catabolic process	12	GO:1903624	GO:1903624	0.683281875357347	0.013961445609054	BP		0.092075192650411
vesicle transport along microtubule	38	GO:0047496	GO:0047496	0.603036562469477	0.013999638503415	BP		0.092237695696265
regulation of transcription by RNA polymerase I	32	GO:0006356	GO:0006356	0.612173651666094	0.014058967729456	BP		0.092539008091562
positive regulation of neuron migration	14	GO:2001224	GO:2001224	0.669094509415651	0.014241951248719	BP		0.093652869757276
protein stabilization	168	GO:0050821	GO:0050821	0.549063900475233	0.014256434851991	BP		0.093657621238079
signal transduction in response to DNA damage	130	GO:0042770	GO:0042770	0.555692477958508	0.014270556269689	BP		0.093659986472036
cellular pigmentation	47	GO:0033059	GO:0033059	0.592327841025491	0.01429707281386	BP		0.093743620010721
positive regulation of histone H3-K9 methylation	11	GO:0051574	GO:0051574	0.690493713202275	0.014346825412797	BP		0.09390131186213
cell-cell adherens junction	79	GO:0005913	GO:0005913	0.571246592888079	0.014348716476141	CC		0.09390131186213
actin nucleation	41	GO:0045010	GO:0045010	0.598691116156315	0.01441136040222	BP		0.094218468269421
rRNA methylation	13	GO:0031167	GO:0031167	0.67506940705788	0.014424866872868	BP		0.094218468269421
regulatory RNA binding	35	GO:0061980	GO:0061980	0.606612738553365	0.014547636084432	MF		0.094873798251443
regulation of cell cycle G1/S phase transition	156	GO:1902806	GO:1902806	0.550706367524329	0.014553077486704	BP		0.094873798251443
positive regulation of cellular protein catabolic process	127	GO:1903364	GO:1903364	0.556122782370046	0.014580535525534	BP		0.094898869348993
intermediate filament binding	15	GO:0019215	GO:0019215	0.662649830725592	0.014593602941786	MF		0.094898869348993
nucleobase-containing small molecule interconversion	27	GO:0015949	GO:0015949	0.621263227513227	0.014605787316698	BP		0.094898869348993
negative regulation of chromatin organization	47	GO:1905268	GO:1905268	0.591964938979777	0.014612696896524	BP		0.094898869348993
RNA polyadenylation	37	GO:0043631	GO:0043631	0.603551592829943	0.014661965098808	BP		0.095128059544793
rRNA methyltransferase activity	12	GO:0008649	GO:0008649	0.681566609491138	0.014710688544841	MF	catalytic activity, acting on a rRNA	0.095353282129704
mitotic nuclear envelope disassembly	12	GO:0007077	GO:0007077	0.681497998856489	0.014741364302457	BP		0.095461204036651
poly(U) RNA binding	20	GO:0008266	GO:0008266	0.640547127068031	0.014786889503966	MF		0.095664990460067
poly-pyrimidine tract binding	22	GO:0008187	GO:0008187	0.633873232843367	0.014873540023063	MF		0.096083590262797
regulation of translational initiation by eIF2 alpha phosphorylation	10	GO:0010998	GO:0010998	0.698470192769431	0.014879827231412	BP		0.096083590262797
positive regulation of cilium assembly	24	GO:0045724	GO:0045724	0.628064272471331	0.014949135269853	BP		0.096439634736131
phosphatidylinositol-3-phosphate binding	38	GO:0032266	GO:0032266	0.601560606444284	0.015162438992726	MF		0.097665176584254
regulation of histone H3-K9 trimethylation	11	GO:1900112	GO:1900112	0.68857898413332	0.015167806589709	BP		0.097665176584254
lysine N-methyltransferase activity	58	GO:0016278	GO:0016278	0.581949062635727	0.015480532270876	MF		0.099576688725653
somatic hypermutation of immunoglobulin genes	11	GO:0016446	GO:0016446	0.687843029637761	0.015493933787903	BP		0.099576688725653
chaperone complex	19	GO:0101031	GO:0101031	0.642796757131709	0.015593522969209	CC		0.1001221861589
translesion synthesis	40	GO:0019985	GO:0019985	0.5982917440022	0.0157611184459	BP		0.101102895516302
condensed chromosome outer kinetochore	12	GO:0000940	GO:0000940	0.678953687821612	0.015918430941344	CC		0.10192677959103
miRNA binding	29	GO:0035198	GO:0035198	0.615180182954271	0.015919507303154	MF		0.10192677959103
positive regulation of double-strand break repair	30	GO:2000781	GO:2000781	0.613175791715326	0.015974219025701	BP		0.102078548335962
postreplication repair	47	GO:0006301	GO:0006301	0.590460651467705	0.015985748856549	BP		0.102078548335962
modification of postsynaptic actin cytoskeleton	12	GO:0098885	GO:0098885	0.678793596340766	0.015995115368525	BP		0.102078548335962
V(D)J recombination	14	GO:0033151	GO:0033151	0.665526266775152	0.01600320468329	BP		0.102078548335962
sulfation	15	GO:0051923	GO:0051923	0.659849940525208	0.016040299710402	BP		0.102150325740649
transcription by RNA polymerase III	51	GO:0006383	GO:0006383	0.586793302901788	0.016044475200816	BP		0.102150325740649
Rac GTPase binding	51	GO:0048365	GO:0048365	0.586739346261344	0.016098012662775	MF		0.102395396432564
DNA-(apurinic or apyrimidinic site) endonuclease activity	12	GO:0003906	GO:0003906	0.678490566037736	0.01614113523898	MF		0.102497917973715
regulation of translational initiation in response to stress	14	GO:0043558	GO:0043558	0.665232180843242	0.016156353394234	BP		0.102497917973715
spliceosomal tri-snRNP complex assembly	11	GO:0000244	GO:0000244	0.686377357549147	0.016161384621094	BP		0.102497917973715
septin cytoskeleton	10	GO:0032156	GO:0032156	0.695417438430404	0.016183607859237	CC		0.102497917973715
regulation of protein deacetylation	41	GO:0090311	GO:0090311	0.596605218767711	0.016189430182448	BP		0.102497917973715
cell-substrate junction assembly	96	GO:0007044	GO:0007044	0.563200147217813	0.016261276604428	BP		0.102857108336189
positive regulation of meiotic cell cycle	18	GO:0051446	GO:0051446	0.645522075029934	0.016286484867444	BP		0.102920906228246
ciliary rootlet	10	GO:0035253	GO:0035253	0.694882348905811	0.016421939641563	CC		0.103680631911387
pigment granule transport	21	GO:0051904	GO:0051904	0.634416089654316	0.016497103971576	BP		0.104058655820711
positive regulation of muscle hypertrophy	31	GO:0014742	GO:0014742	0.610130840624418	0.016928344626597	BP		0.106679919933908
negative regulation of inclusion body assembly	10	GO:0090084	GO:0090084	0.693428003018454	0.017084949778072	BP		0.107567223117074
muscle organ morphogenesis	79	GO:0048644	GO:0048644	0.568900440786925	0.017190300647406	BP		0.108130486327397
inner cell mass cell proliferation	13	GO:0001833	GO:0001833	0.669374333639463	0.017239003536084	BP		0.108336711049478
cellular response to antibiotic	134	GO:0071236	GO:0071236	0.552857383324848	0.017440640666652	BP		0.109502767875674
stem cell population maintenance	157	GO:0019827	GO:0019827	0.548856548856549	0.017468103300019	BP		0.109574111575973
regulation of G1/S transition of mitotic cell cycle	141	GO:2000045	GO:2000045	0.551506564432177	0.017501640328341	BP		0.109683392333965
negative regulation of single stranded viral RNA replication via double stranded DNA intermediate	12	GO:0045869	GO:0045869	0.675557461406518	0.017614499091603	BP		0.110289126786984
positive regulation of establishment of protein localization to mitochondrion	57	GO:1903749	GO:1903749	0.580529092862921	0.017780916172536	BP		0.111190748127726
H4 histone acetyltransferase complex	32	GO:1902562	GO:1902562	0.607372895912058	0.017791173187055	CC		0.111190748127726
endosome transport via multivesicular body sorting pathway	14	GO:0032509	GO:0032509	0.662139377125996	0.017844460034847	BP		0.111421463300154
pyrimidine nucleoside biosynthetic process	28	GO:0046134	GO:0046134	0.61465661888081	0.017882988645545	BP		0.111559689020694
regulation of cilium movement	13	GO:0003352	GO:0003352	0.668081198340564	0.017939637508191	BP		0.111810597876145
rough endoplasmic reticulum	74	GO:0005791	GO:0005791	0.570538808635687	0.018015167800262	CC		0.112178620355519
positive regulation of dendritic spine development	40	GO:0060999	GO:0060999	0.595732797140304	0.018110747389121	BP		0.112603231717962
positive regulation of peptidase activity	170	GO:0010952	GO:0010952	0.546643056195912	0.018116447065996	BP		0.112603231717962
establishment of melanosome localization	21	GO:0032401	GO:0032401	0.631931503893607	0.01818609857431	BP		0.112933017241564
regulation of receptor-mediated endocytosis	94	GO:0048259	GO:0048259	0.562502660859021	0.01820415992192	BP		0.112942126188319
negative regulation of cyclin-dependent protein kinase activity	30	GO:1904030	GO:1904030	0.610171509697511	0.018393798719372	BP		0.114014748710427
positive regulation of dendritic spine morphogenesis	18	GO:0061003	GO:0061003	0.642082503946736	0.018453583065418	BP		0.114281243260447
positive regulation of protein catabolic process	188	GO:0045732	GO:0045732	0.544128359977717	0.018655238814179	BP		0.115425050335727
regulation of Golgi organization	15	GO:1903358	GO:1903358	0.655210906761826	0.018707807315639	BP		0.115551669423873
positive regulation of cell cycle G1/S phase transition	42	GO:1902808	GO:1902808	0.592839954820017	0.018709659080974	BP		0.115551669423873
cardiac muscle tissue development	195	GO:0048738	GO:0048738	0.543282592893488	0.018780613012663	BP		0.115884320307117
epithelial cilium movement involved in determination of left/right asymmetry	10	GO:0060287	GO:0060287	0.689860739521163	0.018808751067094	BP		0.115884320307117
pyrimidine ribonucleotide metabolic process	23	GO:0009218	GO:0009218	0.625237333269646	0.018815024023526	BP		0.115884320307117
positive regulation of endopeptidase activity	151	GO:0010950	GO:0010950	0.549083509034625	0.018834263384527	BP		0.115884320307117
positive regulation of striated muscle cell differentiation	55	GO:0051155	GO:0051155	0.581047468908741	0.018848654507784	BP		0.115884320307117
chromosome organization involved in meiotic cell cycle	52	GO:0070192	GO:0070192	0.583304225873885	0.018894374876011	BP		0.116011089947659
protein binding involved in protein folding	13	GO:0044183	GO:0044183	0.666371092884061	0.018903364494851	MF		0.116011089947659
nuclear envelope organization	45	GO:0006998	GO:0006998	0.589451244670609	0.018976522851361	BP		0.11635514822195
negative regulation of release of cytochrome c from mitochondria	19	GO:0090201	GO:0090201	0.63727997919015	0.01915914993823	BP		0.117308672638226
DNA replication checkpoint	11	GO:0000076	GO:0000076	0.680358746632073	0.01916650660795	BP		0.117308672638226
negative regulation of proteasomal protein catabolic process	52	GO:1901799	GO:1901799	0.583007859014051	0.019237926548314	BP		0.117562352842423
organelle membrane contact site	18	GO:0044232	GO:0044232	0.640915642803212	0.01924250089134	CC		0.117562352842423
calmodulin-dependent protein kinase activity	13	GO:0004683	GO:0004683	0.665621602221026	0.019339421407579	MF		0.118048522062765
positive regulation of heart contraction	37	GO:0045823	GO:0045823	0.598233491223182	0.019358086255915	BP		0.118056572632401
histone acetyltransferase activity	48	GO:0004402	GO:0004402	0.58612324323085	0.019534169753163	MF		0.119023777385879
ruffle organization	49	GO:0031529	GO:0031529	0.585177199232974	0.019609692080732	BP		0.119377070037085
2 iron, 2 sulfur cluster binding	17	GO:0051537	GO:0051537	0.644042956921959	0.019889019115795	MF		0.120969315551475
positive regulation of nuclear division	60	GO:0051785	GO:0051785	0.576700855877561	0.019998636514547	BP		0.121527428676791
maintenance of location in cell	72	GO:0051651	GO:0051651	0.570006123933096	0.020056553068307	BP		0.121770651367436
modification by host of symbiont morphology or physiology	72	GO:0051851	GO:0051851	0.569931488498488	0.020163000766539	BP		0.122252252137382
positive regulation of protein localization to cell periphery	60	GO:1904377	GO:1904377	0.576567770358643	0.0201718012269	BP		0.122252252137382
syntaxin-1 binding	19	GO:0017075	GO:0017075	0.63582039943351	0.020211045752042	MF		0.122279932981053
Z disc	105	GO:0030018	GO:0030018	0.557935959910825	0.020229800199205	CC		0.122279932981053
sarcomere organization	35	GO:0045214	GO:0045214	0.600094243304798	0.020242363914055	BP		0.122279932981053
ARF protein signal transduction	18	GO:0032011	GO:0032011	0.639485665911639	0.020248234567976	BP	regulation of ARF protein signal transduction	0.122279932981053
regulation of modification of synaptic structure	11	GO:1905244	GO:1905244	0.678294331903004	0.020301202611894	BP		0.122404042549251
Golgi to plasma membrane transport	43	GO:0006893	GO:0006893	0.590272980786451	0.020304755221585	BP		0.122404042549251
negative regulation of B cell activation	28	GO:0050869	GO:0050869	0.61165651094561	0.020445189882188	BP		0.123141559591304
regulation of attachment of spindle microtubules to kinetochore	12	GO:0051988	GO:0051988	0.670320182961692	0.020531316483542	BP		0.123550963737387
CTP biosynthetic process	13	GO:0006241	GO:0006241	0.663420633161267	0.020669663200207	BP	pyrimidine ribonucleoside triphosphate biosynthetic process, CTP metabolic process	0.124273611078274
9+0 non-motile cilium	97	GO:0097731	GO:0097731	0.559962434099592	0.020731514163808	CC		0.124535468136696
nuclear pore nuclear basket	11	GO:0044615	GO:0044615	0.677458586967368	0.020776497411821	CC		0.124695627323504
cartilage morphogenesis	10	GO:0060536	GO:0060536	0.685950469918364	0.020866159706611	BP		0.12510520193705
protein-lysine N-methyltransferase activity	57	GO:0016279	GO:0016279	0.577986259523551	0.020898739004559	MF		0.12510520193705
deaminase activity	19	GO:0019239	GO:0019239	0.63489913003266	0.020899884602178	MF		0.12510520193705
lamellipodium organization	76	GO:0097581	GO:0097581	0.567525905937057	0.020984117261359	BP		0.125481238223794
mitotic centrosome separation	11	GO:0007100	GO:0007100	0.677071899012075	0.020999578362754	BP		0.125481238223794
photoreceptor cell cilium	96	GO:0097733	GO:0097733	0.560089739608493	0.021040952785257	CC		0.125618179523207
type B pancreatic cell apoptotic process	10	GO:0097050	GO:0097050	0.685497701859093	0.021116255537219	BP		0.125957261337695
positive regulation of telomere maintenance via telomere lengthening	37	GO:1904358	GO:1904358	0.596437262004272	0.02120922546317	BP		0.126401040720084
translation initiation factor binding	23	GO:0031369	GO:0031369	0.622213199909246	0.021246336911734	MF		0.126511433964355
negative regulation of plasma membrane bounded cell projection assembly	23	GO:0120033	GO:0120033	0.622177376019488	0.021276660349748	BP		0.126581250297536
membrane fusion	117	GO:0061025	GO:0061025	0.554210007147118	0.021536295725775	BP		0.127858383040074
establishment of protein localization to chromosome	24	GO:0070199	GO:0070199	0.619300624871249	0.021544878553702	BP		0.127858383040074
leucine zipper domain binding	11	GO:0043522	GO:0043522	0.676136363636364	0.02154768812033	MF		0.127858383040074
deoxyribose phosphate metabolic process	29	GO:0019692	GO:0019692	0.608469806860548	0.021620519539364	BP		0.128178794411944
positive regulation of cardiocyte differentiation	28	GO:1905209	GO:1905209	0.610255806423126	0.021744128174327	BP		0.128707826371462
negative regulation of centrosome cycle	14	GO:0046606	GO:0046606	0.655845938183137	0.0217475757166	BP		0.128707826371462
error-prone translesion synthesis	18	GO:0042276	GO:0042276	0.637220582515387	0.021932387830608	BP		0.129688819787244
positive regulation of JUN kinase activity	69	GO:0043507	GO:0043507	0.570168766009611	0.021992117268697	BP		0.129929123377387
spontaneous synaptic transmission	11	GO:0098814	GO:0098814	0.675350513920766	0.022017398437249	BP		0.129937050060959
exonuclease activity	66	GO:0004527	GO:0004527	0.571708059174487	0.022036838265835	MF		0.129937050060959
fibroblast growth factor receptor binding	25	GO:0005104	GO:0005104	0.616332921302019	0.022050733591009	MF		0.129937050060959
GTP metabolic process	28	GO:0046039	GO:0046039	0.609868220933541	0.022115633495798	BP		0.130206748765053
myosin binding	60	GO:0017022	GO:0017022	0.575047612491682	0.022241604226635	MF		0.130787890393918
female meiotic nuclear division	30	GO:0007143	GO:0007143	0.606013143733828	0.022252773593323	BP		0.130787890393918
mitochondrial electron transport, ubiquinol to cytochrome c	10	GO:0006122	GO:0006122	0.683316183028058	0.022357089653991	BP		0.131287620522054
LRR domain binding	17	GO:0030275	GO:0030275	0.64049012879002	0.022463716766815	MF		0.131800048547363
cristae formation	28	GO:0042407	GO:0042407	0.609434027062298	0.022538161534356	BP		0.132122934886158
killing of cells of other organism	55	GO:0031640	GO:0031640	0.578121011936041	0.022583640171983	BP	disruption of cells of other organism	0.132275606721614
cytochrome-c oxidase activity	15	GO:0004129	GO:0004129	0.649327477353829	0.022625771004283	MF	heme-copper terminal oxidase activity, oxidoreductase activity, acting on a heme group of donors, oxygen as acceptor	0.132408424295053
spongiotrophoblast layer development	13	GO:0060712	GO:0060712	0.660327664650431	0.022669383994622	BP		0.132549679954811
regulation of extrinsic apoptotic signaling pathway via death domain receptors	55	GO:1902041	GO:1902041	0.577845757325526	0.022965033916388	BP		0.13416310801282
histone demethylase activity (H3-K9 specific)	11	GO:0032454	GO:0032454	0.673654076439477	0.023060902918771	MF		0.134607637448674
regulation of dendrite development	137	GO:0050773	GO:0050773	0.549337004015861	0.023243910611247	BP		0.135559602073819
positive regulation of cell growth	159	GO:0030307	GO:0030307	0.545820670150459	0.023270069640843	BP		0.135595970869498
negative regulation of small GTPase mediated signal transduction	51	GO:0051058	GO:0051058	0.580562659846547	0.023326428711149	BP		0.135808104198527
cilium or flagellum-dependent cell motility	22	GO:0001539	GO:0001539	0.62244483974659	0.023411438804665	BP	cilium-dependent cell motility	0.13618654060218
structural constituent of synapse	15	GO:0098918	GO:0098918	0.648215756244853	0.023438957058468	MF		0.136230180819754
regulation of protein localization to membrane	180	GO:1905475	GO:1905475	0.54297293753808	0.023585368307735	BP		0.136902539552327
interaction with symbiont	76	GO:0051702	GO:0051702	0.565891030035291	0.023594869070655	BP		0.136902539552327
protein serine/threonine phosphatase activity	49	GO:0004722	GO:0004722	0.581938677245558	0.023656786730456	MF		0.137144881164804
regulation of cellular respiration	28	GO:0043457	GO:0043457	0.608075024776035	0.023904885178836	BP		0.138465232789068
Wnt signaling pathway, planar cell polarity pathway	107	GO:0060071	GO:0060071	0.555393840037177	0.023989648342073	BP		0.138838049843663
antigen processing and presentation of exogenous peptide antigen via MHC class II	95	GO:0019886	GO:0019886	0.55874239144646	0.024030855563799	BP		0.138958371255071
Mitochondria-associated ER Membrane	12	GO:0044233	GO:0044233	0.664636935391652	0.024149486394046	CC		0.139525810184957
mRNA polyadenylation	35	GO:0006378	GO:0006378	0.596424644624205	0.024210364107671	BP		0.139758895773373
neuronal stem cell division	13	GO:0036445	GO:0036445	0.658026411628717	0.024260944491386	BP	neuroblast division	0.139932193396926
post-Golgi vesicle-mediated transport	77	GO:0006892	GO:0006892	0.564991452379461	0.024403893615017	BP		0.140637510536668
hydrolase activity, acting on carbon-nitrogen (but not peptide) bonds, in cyclic amidines	21	GO:0016814	GO:0016814	0.624170442583184	0.024440289477173	MF		0.14072809660037
rough endoplasmic reticulum membrane	23	GO:0030867	GO:0030867	0.618135247125133	0.02494124657271	CC		0.143404564652123
regulation of histone H3-K4 methylation	27	GO:0051569	GO:0051569	0.60904304029304	0.024947253092582	BP		0.143404564652123
regulation of protein insertion into mitochondrial membrane involved in apoptotic signaling pathway	25	GO:1900739	GO:1900739	0.613292130201895	0.024968453217559	BP	positive regulation of protein insertion into mitochondrial membrane involved in apoptotic signaling pathway	0.143405310209878
catalytic activity, acting on a glycoprotein	20	GO:0140103	GO:0140103	0.626518843962381	0.025080782231621	MF		0.143929008320752
cell proliferation in forebrain	27	GO:0021846	GO:0021846	0.608742877492877	0.02526383730232	BP		0.144857351878338
glycosyl compound biosynthetic process	41	GO:1901659	GO:1901659	0.588238154483841	0.025328214674112	BP		0.145104233225594
XY body	13	GO:0001741	GO:0001741	0.656194909797215	0.025593750893384	CC		0.146502160286269
positive regulation of mRNA processing	25	GO:0050685	GO:0050685	0.612599917593737	0.025676073072619	BP		0.146786870599633
transcription factor TFIIH holo complex	10	GO:0005675	GO:0005675	0.677910406805241	0.02569920383185	CC		0.146786870599633
protein K11-linked deubiquitination	10	GO:0035871	GO:0035871	0.677896686561021	0.02570819126576	BP		0.146786870599633
antigen processing and presentation of peptide antigen via MHC class II	98	GO:0002495	GO:0002495	0.556886927591797	0.025937330669743	BP		0.147971058288575
positive regulation of protein autophosphorylation	24	GO:0031954	GO:0031954	0.614596923710774	0.026003071552063	BP		0.148221863470136
retrograde transport, endosome to Golgi	70	GO:0042147	GO:0042147	0.567135083006131	0.026128863299922	BP		0.1488142624429
peptide hormone receptor binding	15	GO:0051428	GO:0051428	0.644711318510385	0.026164917291664	MF		0.148895005925639
protein demethylation	28	GO:0006482	GO:0006482	0.605771589492999	0.026380330149849	BP	protein dealkylation	0.149995427735899
regulation of protein export from nucleus	36	GO:0046825	GO:0046825	0.593265831290709	0.026432981214726	BP		0.150169340690672
interleukin-12-mediated signaling pathway	46	GO:0035722	GO:0035722	0.582517798249627	0.026459206670307	BP		0.150192961299505
oogenesis	84	GO:0048477	GO:0048477	0.561052228931288	0.026637825033981	BP		0.151080864317729
histone demethylation	26	GO:0016577	GO:0016577	0.609444089321845	0.026719587596239	BP		0.151418412306414
positive regulation of G1/S transition of mitotic cell cycle	32	GO:1900087	GO:1900087	0.598561490896599	0.026853261516033	BP		0.151949865867748
deoxyribonucleotide metabolic process	29	GO:0009262	GO:0009262	0.603519335262991	0.026858020663958	BP		0.151949865867748
protein localization to chromosome, telomeric region	28	GO:0070198	GO:0070198	0.605290787240097	0.026923195909296	BP		0.15219208584607
SNARE complex assembly	14	GO:0035493	GO:0035493	0.648802580113909	0.026947577433643	BP		0.152203495446784
regulation of telomerase RNA localization to Cajal body	18	GO:1904872	GO:1904872	0.630776153324029	0.027382939857912	BP		0.154534236047221
dorsal spinal cord development	22	GO:0021516	GO:0021516	0.618237992697313	0.027454248281683	BP		0.154808296441703
regulation of dendrite morphogenesis	80	GO:0048814	GO:0048814	0.561981284896946	0.027741943729538	BP		0.156301050515924
DNA repair complex	29	GO:1990391	GO:1990391	0.602685571625508	0.027836809992167	CC		0.156705813735889
regulation of establishment of planar polarity	109	GO:0090175	GO:0090175	0.553092892601365	0.027879917635663	BP		0.156818776387043
positive regulation of mitochondrial outer membrane permeabilization involved in apoptotic signaling pathway	34	GO:1901030	GO:1901030	0.594738905663275	0.027982075416879	BP		0.157263423028306
astral microtubule	10	GO:0000235	GO:0000235	0.674473485628044	0.028034240812564	CC	aster	0.157426603110816
negative regulation of cyclin-dependent protein serine/threonine kinase activity	29	GO:0045736	GO:0045736	0.602441601015676	0.028128774840726	BP		0.157819926118633
protein targeting to mitochondrion	83	GO:0006626	GO:0006626	0.560654642840529	0.028150659757276	BP		0.157819926118633
melanosome transport	20	GO:0032402	GO:0032402	0.623264913846365	0.028182021094658	BP		0.157865708288267
cellular hyperosmotic response	15	GO:0071474	GO:0071474	0.642227102205142	0.028253857434504	BP		0.158093863407157
somatic diversification of immune receptors	67	GO:0002200	GO:0002200	0.567401628222524	0.028280245437799	BP		0.158093863407157
pyrimidine nucleoside catabolic process	24	GO:0046135	GO:0046135	0.612439630112843	0.028292436913006	BP		0.158093863407157
type I interferon production	124	GO:0032606	GO:0032606	0.549612135973218	0.028354900539133	BP		0.158312922944493
regulation of DNA recombination	84	GO:0000018	GO:0000018	0.560150116724619	0.028447133578276	BP		0.158697697650612
cytoplasmic stress granule	55	GO:0010494	GO:0010494	0.574186122163001	0.028572616369664	CC		0.159267180189951
modulation by host of viral genome replication	15	GO:0044827	GO:0044827	0.641787903742337	0.028637243938922	BP		0.159496793983881
regulation of androgen receptor signaling pathway	28	GO:0060765	GO:0060765	0.60369628997282	0.028790675257215	BP		0.160220225511536
establishment of protein localization to plasma membrane	48	GO:0061951	GO:0061951	0.579101898342389	0.029030482403762	BP		0.16142276408497
plasma membrane repair	10	GO:0001778	GO:0001778	0.672957398641696	0.029119052438084	BP		0.161783078280486
positive regulation of transcription by RNA polymerase III	10	GO:0045945	GO:0045945	0.672923098031145	0.02914399355779	BP		0.161789575982313
oxidoreductase activity, acting on paired donors, with incorporation or reduction of molecular oxygen, 2-oxoglutarate as one donor, and incorporation of one atom each of oxygen into both donors	40	GO:0016706	GO:0016706	0.586426754657318	0.029323269371688	MF		0.162652136384439
SAGA-type complex	26	GO:0070461	GO:0070461	0.607074746556925	0.029409570975524	CC		0.162997996791054
negative regulation of centrosome duplication	12	GO:0010826	GO:0010826	0.657369925671812	0.029542307474655	BP		0.163600443183482
antigen processing and presentation of peptide or polysaccharide antigen via MHC class II	99	GO:0002504	GO:0002504	0.55493574619748	0.029581643274948	BP		0.163658731445451
cardiac muscle tissue morphogenesis	62	GO:0055008	GO:0055008	0.569319860085503	0.029600925420122	BP		0.163658731445451
Ral GTPase binding	15	GO:0017160	GO:0017160	0.640607557873547	0.02968908267531	MF		0.163819827773961
sialylation	20	GO:0097503	GO:0097503	0.621788975080662	0.029690516775708	BP	sialyltransferase activity	0.163819827773961
base conversion or substitution editing	10	GO:0016553	GO:0016553	0.672161624476916	0.029702272623137	BP		0.163819827773961
presynaptic modulation of chemical synaptic transmission	14	GO:0099171	GO:0099171	0.645293154659792	0.029903460851066	BP		0.164765255666241
ribosomal small subunit binding	12	GO:0043024	GO:0043024	0.656901086335049	0.029922106377237	MF		0.164765255666241
phosphatidylinositol 3-kinase complex	11	GO:0005942	GO:0005942	0.663806007384493	0.029973874128515	CC		0.164916885463761
mitochondrial calcium ion transmembrane transport	25	GO:0006851	GO:0006851	0.608570251339102	0.030136476388864	BP		0.165677591520687
regulation of vesicle fusion	25	GO:0031338	GO:0031338	0.608515313830518	0.030201465595167	BP		0.165841592723178
regulation of keratinocyte migration	14	GO:0051547	GO:0051547	0.6449402515415	0.030215041871399	BP		0.165841592723178
hair follicle maturation	16	GO:0048820	GO:0048820	0.635423100679432	0.030372009888445	BP		0.166568814907942
regulation of protein localization to chromosome, telomeric region	14	GO:1904814	GO:1904814	0.643945260805207	0.031108044608911	BP		0.170468076979264
regulation of oxidative phosphorylation	23	GO:0002082	GO:0002082	0.612239231935804	0.031224176541216	BP		0.170966810570809
positive regulation of protein modification by small protein conjugation or removal	127	GO:1903322	GO:1903322	0.547812591890744	0.031562379980144	BP		0.17267970911966
liver morphogenesis	19	GO:0072576	GO:0072576	0.623124945807682	0.031595600871642	BP		0.172722618098309
extrinsic component of synaptic membrane	12	GO:0099243	GO:0099243	0.65472841623785	0.031735388524539	CC		0.173347555616381
regulation of striated muscle cell differentiation	97	GO:0051153	GO:0051153	0.554533876900529	0.03184924095035	BP		0.173829938980016
inflammasome complex	13	GO:0061702	GO:0061702	0.648399151280996	0.031971129383779	CC		0.174234890963446
microtubule plus-end binding	13	GO:0051010	GO:0051010	0.648383316971213	0.031985309505362	MF		0.174234890963446
nuclear replisome	18	GO:0043601	GO:0043601	0.626108708749933	0.032000237100251	CC		0.174234890963446
cyclic nucleotide binding	32	GO:0030551	GO:0030551	0.59458734111989	0.032055503194373	MF		0.174396286763312
negative regulation of DNA repair	31	GO:0045738	GO:0045738	0.596016275297184	0.032168217051595	BP		0.174869716655876
histone methyltransferase activity (H3-K9 specific)	10	GO:0046974	GO:0046974	0.668868765864032	0.03221955674802	MF		0.175009020931381
autophagosome maturation	34	GO:0097352	GO:0097352	0.591610381526348	0.032286891009115	BP		0.175234912446601
nuclear replication fork	27	GO:0043596	GO:0043596	0.602724358974359	0.032356165709248	CC		0.175466719865738
cGMP binding	12	GO:0030553	GO:0030553	0.653979416809605	0.032381163701347	MF		0.175466719865738
structural constituent of postsynapse	10	GO:0099186	GO:0099186	0.668498319270083	0.032513459689903	MF		0.176043442044135
insulin-like growth factor receptor signaling pathway	33	GO:0048009	GO:0048009	0.592807975314503	0.032541961800748	BP		0.176057704305162
protein neddylation	11	GO:0045116	GO:0045116	0.660569054984532	0.032591332433915	BP		0.176184756588742
HOPS complex	13	GO:0030897	GO:0030897	0.647612713895135	0.032681711044014	CC		0.17653311536949
smooth endoplasmic reticulum	30	GO:0005790	GO:0005790	0.597089601795242	0.032871962865166	CC		0.177419967692562
positive regulation of proteolysis involved in cellular protein catabolic process	107	GO:1903052	GO:1903052	0.551518046160996	0.032943939448013	BP		0.177667552997764
organelle inheritance	13	GO:0048308	GO:0048308	0.647290749596225	0.032976353558325	BP	Golgi inheritance	0.17770155369593
embryonic placenta morphogenesis	25	GO:0060669	GO:0060669	0.606221672847136	0.033020203685015	BP		0.177797077753334
nuclear migration	15	GO:0007097	GO:0007097	0.636778296275963	0.03332431677486	BP		0.179292727248771
positive regulation of adherens junction organization	31	GO:1903393	GO:1903393	0.5949990692232	0.033606759233061	BP		0.180669512906962
retrograde axonal transport	16	GO:0008090	GO:0008090	0.632004495230252	0.033773863181701	BP		0.181424556286233
mitochondrial genome maintenance	27	GO:0000002	GO:0000002	0.601610195360195	0.033834510825463	BP		0.181607003689355
positive regulation of calcium ion transmembrane transporter activity	37	GO:1901021	GO:1901021	0.586746540354788	0.033965727031509	BP		0.182167642377026
lamellipodium	190	GO:0030027	GO:0030027	0.53846598158242	0.034026699101539	CC		0.182350955972497
male meiotic nuclear division	44	GO:0007140	GO:0007140	0.579491539197239	0.034095757873657	BP		0.182577284097649
spindle pole centrosome	13	GO:0031616	GO:0031616	0.646055673433195	0.034126995074242	CC		0.182600887166111
negative regulation of viral release from host cell	15	GO:1902187	GO:1902187	0.635899899350352	0.034207950639223	BP		0.182886602681581
mitochondrial transmembrane transport	64	GO:1990542	GO:1990542	0.565890096743097	0.034234136323293	BP		0.182886602681581
histone H3 acetylation	58	GO:0043966	GO:0043966	0.569150640455118	0.03433302953577	BP		0.183037566312104
'de novo' protein folding	23	GO:0006458	GO:0006458	0.609671853169817	0.034342855521744	BP		0.183037566312104
Ino80 complex	15	GO:0031011	GO:0031011	0.635767224814713	0.034343075548128	CC	DNA helicase complex	0.183037566312104
ribbon synapse	11	GO:0097470	GO:0097470	0.658323770082826	0.034515447080035	CC		0.183723606965193
histone H2A acetylation	14	GO:0043968	GO:0043968	0.640342708139318	0.034525785087934	BP		0.183723606965193
positive regulation of voltage-gated calcium channel activity	12	GO:1901387	GO:1901387	0.65147512864494	0.034619494138623	BP		0.184078341490207
nuclear hormone receptor binding	147	GO:0035257	GO:0035257	0.54346015414476	0.034682596655968	MF		0.184269908540605
regulation of DNA damage response, signal transduction by p53 class mediator	33	GO:0043516	GO:0043516	0.591327595037915	0.034742259544967	BP		0.184442916117817
deoxyribonucleoside triphosphate metabolic process	15	GO:0009200	GO:0009200	0.635186201848294	0.034940005738123	BP		0.185348152029356
negative regulation of calcium ion-dependent exocytosis	10	GO:0045955	GO:0045955	0.665424984564725	0.035038008037947	BP		0.18572327313572
nucleoside diphosphate kinase activity	14	GO:0004550	GO:0004550	0.639793747733088	0.03507270767339	MF		0.185762527957268
skeletal muscle contraction	37	GO:0003009	GO:0003009	0.586031392216959	0.035115976908585	BP		0.185847075303133
negative regulation of tyrosine phosphorylation of STAT protein	12	GO:0042532	GO:0042532	0.650857632933105	0.035190521020202	BP		0.186096881168218
muscle adaptation	98	GO:0043500	GO:0043500	0.552925442383455	0.035242319290007	BP		0.186226106434617
pyrimidine ribonucleotide biosynthetic process	21	GO:0009220	GO:0009220	0.613892103594149	0.035413009357207	BP		0.186877495858317
Rab GTPase binding	108	GO:0017137	GO:0017137	0.550367326370503	0.035425952921372	MF		0.186877495858317
striated muscle cell development	131	GO:0055002	GO:0055002	0.545754001613741	0.035471741844022	BP		0.186877495858317
apoptotic mitochondrial changes	114	GO:0008637	GO:0008637	0.548996255580567	0.035534917960229	BP		0.186877495858317
muscle tissue morphogenesis	73	GO:0060415	GO:0060415	0.561137003290163	0.035546666743654	BP		0.186877495858317
positive regulation of DNA repair	62	GO:0045739	GO:0045739	0.566298373216368	0.035580055815087	BP		0.186877495858317
somatic stem cell division	21	GO:0048103	GO:0048103	0.61373191319642	0.035611708816823	BP		0.186877495858317
transcription factor TFTC complex	14	GO:0033276	GO:0033276	0.639254590191254	0.035616764017528	CC		0.186877495858317
ciliary tip	45	GO:0097542	GO:0097542	0.577750271244976	0.035624710685157	CC		0.186877495858317
mitochondrial fusion	21	GO:0008053	GO:0008053	0.613709028853887	0.035640168913326	BP		0.186877495858317
histone deacetylation	60	GO:0016575	GO:0016575	0.567343567150823	0.035676821940862	BP		0.186925673694769
response to UV-C	15	GO:0010225	GO:0010225	0.634243755146857	0.035926345778859	BP		0.188075398277019
nucleoside biosynthetic process	40	GO:0009163	GO:0009163	0.582262665841754	0.035951527058243	BP		0.188075398277019
regulation of establishment of protein localization to mitochondrion	71	GO:1903747	GO:1903747	0.56176671492166	0.036053477596338	BP		0.188402099807184
negative regulation of vascular smooth muscle cell proliferation	18	GO:1904706	GO:1904706	0.622436528092373	0.036069341176721	BP		0.188402099807184
negative regulation of stress fiber assembly	20	GO:0051497	GO:0051497	0.6160911649619	0.036155502495163	BP		0.188692370862689
N-methyltransferase activity	86	GO:0008170	GO:0008170	0.556101183077991	0.036180362029946	MF		0.188692370862689
positive regulation of telomere maintenance via telomerase	34	GO:0032212	GO:0032212	0.58894871079745	0.036366788169294	BP		0.189519418285001
synaptic vesicle priming	12	GO:0016082	GO:0016082	0.649502572898799	0.036470711839488	BP		0.189915581315648
response to antineoplastic agent	93	GO:0097327	GO:0097327	0.553819823108116	0.036556696242496	BP		0.190217794056902
postsynaptic cytoskeleton organization	11	GO:0099188	GO:0099188	0.65595998403353	0.036640962940793	BP		0.19051061403746
regulation of sodium ion transmembrane transporter activity	41	GO:2000649	GO:2000649	0.580820139976458	0.036720817775057	BP		0.190780065478654
2'-deoxyribonucleotide metabolic process	27	GO:0009394	GO:0009394	0.599491249491249	0.036799345241607	BP		0.191042214885106
cellular response to UV	75	GO:0034644	GO:0034644	0.559549797868431	0.037389253268126	BP		0.193956751328403
cellular response to arsenic-containing substance	19	GO:0071243	GO:0071243	0.618059770513599	0.037422441125826	BP		0.193981061921072
mitochondrion localization	42	GO:0051646	GO:0051646	0.579448018464863	0.03745993363384	BP		0.194027631896435
activation of protein kinase B activity	32	GO:0032148	GO:0032148	0.590896599106836	0.037606317547914	BP		0.194567994060126
titin binding	13	GO:0031432	GO:0031432	0.642503509938668	0.037621434055705	MF		0.194567994060126
telomeric loop disassembly	11	GO:0090657	GO:0090657	0.654849815387686	0.03767555553118	BP		0.194699947566599
positive regulation of embryonic development	36	GO:0040019	GO:0040019	0.585561129819256	0.03786001489285	BP		0.195504750653062
regulation of intrinsic apoptotic signaling pathway	157	GO:2001242	GO:2001242	0.5411081831464	0.037981569681081	BP		0.195983747725121
positive regulation of sodium ion transport	31	GO:0010765	GO:0010765	0.591974044624099	0.038200342918447	BP		0.196963283259812
pyrimidine ribonucleoside biosynthetic process	20	GO:0046132	GO:0046132	0.614381821926272	0.038305874469063	BP		0.197243075401146
regulation of actomyosin structure organization	87	GO:0110020	GO:0110020	0.554965517241379	0.038312569156673	BP		0.197243075401146
ventricular cardiac muscle cell development	11	GO:0055015	GO:0055015	0.653982885939527	0.038499946136774	BP		0.1980579239659
error-free translesion synthesis	19	GO:0070987	GO:0070987	0.617080695973872	0.038644252493147	BP		0.198650137815979
transcription preinitiation complex assembly	24	GO:0070897	GO:0070897	0.604105152326673	0.038766401151987	BP		0.199127642445603
Golgi localization	13	GO:0051645	GO:0051645	0.641226208949552	0.038947274240683	BP		0.199877774273741
adherens junction assembly	90	GO:0034333	GO:0034333	0.553807301127436	0.038971173444204	BP		0.199877774273741
regulation of type I interferon production	122	GO:0032479	GO:0032479	0.546230868178135	0.039084239035173	BP		0.20030672505526
positive regulation of keratinocyte differentiation	14	GO:0045618	GO:0045618	0.635784376194724	0.039286219439067	BP		0.201190375848222
positive regulation of keratinocyte migration	12	GO:0051549	GO:0051549	0.646363636363636	0.039582929739621	BP		0.202557458502151
regulation of insulin-like growth factor receptor signaling pathway	21	GO:0043567	GO:0043567	0.610649065338067	0.039616950773274	BP		0.202579238890233
glutathione transferase activity	21	GO:0004364	GO:0004364	0.610531374433613	0.039776834701155	MF		0.203244096828874
positive regulation of cytoplasmic transport	13	GO:1903651	GO:1903651	0.640313097085431	0.039918214481328	BP		0.203813479189738
myoblast proliferation	17	GO:0051450	GO:0051450	0.622560458637813	0.040110573178059	BP		0.204636402378209
oxidoreductase activity, acting on a heme group of donors	16	GO:0016675	GO:0016675	0.62630395992039	0.040139523534368	MF		0.204636402378209
positive regulation of actin filament depolymerization	13	GO:0030836	GO:0030836	0.639843345895219	0.040425327102595	BP		0.20593920378762
secretory granule localization	12	GO:0032252	GO:0032252	0.645506003430532	0.040469847413006	BP		0.206011803659622
intrinsic component of mitochondrial inner membrane	36	GO:0031304	GO:0031304	0.58394993853038	0.040698896490083	CC	integral component of mitochondrial inner membrane	0.207022936854639
homologous chromosome segregation	47	GO:0045143	GO:0045143	0.573427668354356	0.040848634810859	BP		0.207629431308965
NuA4 histone acetyltransferase complex	14	GO:0035267	GO:0035267	0.634299242238582	0.040947930941284	CC	H4/H2A histone acetyltransferase complex	0.207978819392821
regulation of spindle checkpoint	14	GO:0090231	GO:0090231	0.634157100704826	0.041109918423265	BP	regulation of mitotic cell cycle spindle assembly checkpoint, regulation of mitotic spindle checkpoint	0.208645864868563
vascular endothelial cell proliferation	19	GO:0101023	GO:0101023	0.615129772536778	0.041175752448196	BP	regulation of vascular endothelial cell proliferation	0.208824270612832
Golgi to plasma membrane protein transport	32	GO:0043001	GO:0043001	0.588678718653384	0.041303735198391	BP		0.20916353750492
positive regulation of protein binding	93	GO:0032092	GO:0032092	0.552126871927724	0.041304113195212	BP		0.20916353750492
centrosome separation	12	GO:0051299	GO:0051299	0.64464265294454	0.041378906264335	BP		0.209386495193356
adult heart development	15	GO:0007512	GO:0007512	0.629311922408272	0.041466215138362	BP		0.209672407304376
spliceosomal snRNP assembly	34	GO:0000387	GO:0000387	0.585765619379065	0.041790062095161	BP		0.211153053169759
regulation of apoptotic DNA fragmentation	10	GO:1902510	GO:1902510	0.657961171708856	0.041843028991627	BP		0.211263839255944
ESC/E(Z) complex	16	GO:0035098	GO:0035098	0.62475979685677	0.042022340485492	CC		0.212011897215907
response to type I interferon	93	GO:0034340	GO:0034340	0.551784869081904	0.042321372379213	BP		0.213362415120683
site of polarized growth	169	GO:0030427	GO:0030427	0.538392591115149	0.042822382346144	CC		0.215728448740084
receptor signaling complex scaffold activity	22	GO:0030159	GO:0030159	0.605810941547296	0.042912615207391	MF		0.215773740888342
positive regulation of ubiquitin-dependent protein catabolic process	82	GO:2000060	GO:2000060	0.55491798454696	0.042917558920975	BP		0.215773740888342
DNA demethylation	22	GO:0080111	GO:0080111	0.605801579128047	0.042926483273996	BP		0.215773740888342
heparan sulfate proteoglycan metabolic process	26	GO:0030201	GO:0030201	0.597042679866662	0.043401806344947	BP		0.218001988179859
negative regulation of DNA biosynthetic process	38	GO:2000279	GO:2000279	0.580260535178761	0.043486659311163	BP		0.218267111557354
growth cone	166	GO:0030426	GO:0030426	0.538556556160151	0.043544064854529	CC		0.218394182313872
translation preinitiation complex	15	GO:0070993	GO:0070993	0.627504803733187	0.043661846594435	CC		0.21870073366741
antimicrobial humoral immune response mediated by antimicrobial peptide	46	GO:0061844	GO:0061844	0.572883869598108	0.043669474720535	BP		0.21870073366741
positive regulation of smooth muscle cell apoptotic process	15	GO:0034393	GO:0034393	0.627472778845274	0.043701586510091	BP		0.21870073366741
positive regulation of meiotic nuclear division	12	GO:0045836	GO:0045836	0.642401372212693	0.043816259484222	BP		0.219113491586784
histone H3-K9 demethylation	11	GO:0033169	GO:0033169	0.648475701027842	0.044086175952495	BP		0.220037607318919
ubiquitination-like modification-dependent protein binding	10	GO:0140035	GO:0140035	0.655704191534609	0.044099710572831	MF	ubiquitin-dependent protein binding	0.220037607318919
convergent extension	14	GO:0060026	GO:0060026	0.631588750232818	0.044127407426401	BP		0.220037607318919
replisome	20	GO:0030894	GO:0030894	0.610115329168669	0.044130375255704	CC		0.220037607318919
maintenance of protein location in nucleus	22	GO:0051457	GO:0051457	0.604855974783884	0.044345918640036	BP		0.220950455537398
positive regulation of telomerase activity	36	GO:0051973	GO:0051973	0.581974129307646	0.044413463367033	BP		0.221125114613039
ribonucleoside metabolic process	88	GO:0009119	GO:0009119	0.552506755951821	0.044467544681641	BP		0.221232535894188
modification of morphology or physiology of other organism involved in symbiotic interaction	108	GO:0051817	GO:0051817	0.5473604172582	0.044698993335041	BP		0.222221584103935
non-motile cilium	122	GO:0097730	GO:0097730	0.544518991573782	0.044924975517233	CC		0.223150591017488
regulation of cell junction assembly	89	GO:1901888	GO:1901888	0.552055223424851	0.044951434070669	BP		0.223150591017488
UDP-xylosyltransferase activity	11	GO:0035252	GO:0035252	0.647490270432093	0.045151525133244	MF	xylosyltransferase activity	0.223980524822784
positive regulation of sodium ion transmembrane transport	19	GO:1902307	GO:1902307	0.612091389924564	0.045384512020549	BP		0.224972315230779
positive regulation of receptor internalization	24	GO:0002092	GO:0002092	0.599710453432214	0.045450144802915	BP		0.225133686702067
regulation of hippo signaling	12	GO:0035330	GO:0035330	0.640914808461978	0.04549582536043	BP		0.22519606356588
positive regulation of muscle cell differentiation	85	GO:0051149	GO:0051149	0.55306286354012	0.045544946337552	BP		0.225275366841118
positive regulation of dendrite development	67	GO:1900006	GO:1900006	0.559567863163521	0.045986117820182	BP		0.227292315093798
histone lysine demethylation	25	GO:0070076	GO:0070076	0.597269605823376	0.046164978617336	BP		0.228010772474301
cilium movement involved in cell motility	12	GO:0060294	GO:0060294	0.640285877644368	0.046221821962099	BP		0.228125975543182
oocyte development	44	GO:0048599	GO:0048599	0.573192038656523	0.046555455798097	BP		0.229578599318253
phosphatidylinositol-3,5-bisphosphate binding	25	GO:0080025	GO:0080025	0.597011399533031	0.04659893421181	MF		0.229578599318253
protein localization to endosome	22	GO:0036010	GO:0036010	0.603392316574603	0.046617341207439	BP		0.229578599318253
synaptonemal complex organization	21	GO:0070193	GO:0070193	0.60575835441962	0.046715586911877	BP		0.229896084253242
nucleotide-excision repair, preincision complex stabilization	21	GO:0006293	GO:0006293	0.60567662462486	0.046842361128052	BP	nucleotide-excision repair, DNA incision, 3'-to lesion	0.230353403061793
eukaryotic 43S preinitiation complex	14	GO:0016282	GO:0016282	0.629334091421513	0.046921261775499	CC		0.230574806963211
regulation of peptidyl-threonine phosphorylation	43	GO:0010799	GO:0010799	0.573835290505795	0.046999895249719	BP		0.230794579415289
chondrocyte proliferation	16	GO:0035988	GO:0035988	0.62079644499348	0.047183398538991	BP		0.231528630466023
somatic diversification of immune receptors via germline recombination within a single locus	60	GO:0002562	GO:0002562	0.562358596636149	0.047485474300719	BP	somatic cell DNA recombination	0.232648364081221
contractile actin filament bundle assembly	92	GO:0030038	GO:0030038	0.550407936769801	0.047507247993792	BP	stress fiber assembly	0.232648364081221
antigen processing and presentation of exogenous peptide antigen	171	GO:0002478	GO:0002478	0.537073410959882	0.047514138417999	BP		0.232648364081221
establishment of protein localization to postsynaptic membrane	14	GO:1903540	GO:1903540	0.628804736744077	0.047597357366422	BP		0.232888292045915
cellular response to hydrogen peroxide	87	GO:0070301	GO:0070301	0.551777249306381	0.047667021803056	BP		0.233061602292817
positive regulation of intracellular protein transport	148	GO:0090316	GO:0090316	0.539762804566461	0.047745367227085	BP		0.23327707778
endonuclease activity, active with either ribo- or deoxyribonucleic acids and producing 3'-phosphomonoesters	13	GO:0016894	GO:0016894	0.633514900085505	0.04778034862554	MF		0.233280525642342
negative regulation of stress-activated MAPK cascade	45	GO:0032873	GO:0032873	0.571805803878421	0.047860144403806	BP	negative regulation of stress-activated protein kinase signaling cascade	0.233502611334985
positive regulation of apoptotic signaling pathway	172	GO:2001235	GO:2001235	0.536873331236035	0.047933413830958	BP		0.23369256055408
RISC complex	10	GO:0016442	GO:0016442	0.651814502298141	0.048218316634225	CC		0.234913287768458
positive regulation of mRNA 3'-end processing	11	GO:0031442	GO:0031442	0.644627532182417	0.048364310033752	BP		0.235456004356018
mitochondrial ATP synthesis coupled proton transport	19	GO:0042776	GO:0042776	0.609840602329547	0.048720109333631	BP		0.237018630539453
positive regulation of organelle assembly	70	GO:1902117	GO:1902117	0.557283578858284	0.04884304080086	BP		0.237446954064751
antigen processing and presentation of exogenous antigen	173	GO:0019884	GO:0019884	0.536549244432396	0.048928985023581	BP		0.237694983633468
viral translation	14	GO:0019081	GO:0019081	0.627731323092608	0.048992274794421	BP		0.237730463207511
macropinocytosis	10	GO:0044351	GO:0044351	0.651101049598683	0.049006147499286	BP		0.237730463207511
deoxyribonucleotide biosynthetic process	10	GO:0009263	GO:0009263	0.651025588255471	0.049090073690188	BP		0.237967978301582
chaperone-mediated protein complex assembly	16	GO:0051131	GO:0051131	0.618716114199437	0.050089105975051	BP		0.242638046452807
negative regulation of histone modification	40	GO:0031057	GO:0031057	0.57509280263972	0.050205071029708	BP		0.242766259108314
filopodium assembly	58	GO:0046847	GO:0046847	0.562398389902715	0.050208572940584	BP		0.242766259108314
cardiac muscle cell differentiation	102	GO:0055007	GO:0055007	0.547120415304541	0.050222581960697	BP		0.242766259108314
cellular response to interleukin-12	48	GO:0071349	GO:0071349	0.5684939358507	0.050391008880909	BP		0.243264323673504
ribosome binding	47	GO:0043022	GO:0043022	0.569206005443531	0.050416557963462	MF		0.243264323673504
positive regulation of cell aging	14	GO:0090343	GO:0090343	0.626648106576742	0.050432847590849	BP		0.243264323673504
barbed-end actin filament capping	14	GO:0051016	GO:0051016	0.62658928939036	0.050512024703927	BP		0.243376280223301
response to interleukin-12	49	GO:0070671	GO:0070671	0.567739435848628	0.05052757624971	BP		0.243376280223301
SCF ubiquitin ligase complex	34	GO:0019005	GO:0019005	0.581190051778287	0.050714000159614	CC		0.244016846792261
AMP metabolic process	12	GO:0046033	GO:0046033	0.636546598056032	0.050732271262276	BP		0.244016846792261
proteoglycan biosynthetic process	53	GO:0030166	GO:0030166	0.565032935134532	0.05081381722113	BP		0.244236468931506
peptidyl-glutamic acid modification	26	GO:0018200	GO:0018200	0.592496817103643	0.051309881813732	BP		0.246446757674144
positive regulation by host of viral transcription	17	GO:0043923	GO:0043923	0.614292058621664	0.051404988829566	BP		0.246666112899921
multicellular organismal movement	49	GO:0050879	GO:0050879	0.567384279341121	0.051428036174697	BP	musculoskeletal movement	0.246666112899921
negative regulation of necrotic cell death	14	GO:0060547	GO:0060547	0.625854074560587	0.051510116685596	BP		0.246885812790257
ncRNA 3'-end processing	13	GO:0043628	GO:0043628	0.63042720967793	0.05173906906551	BP		0.24780865873319
hematopoietic progenitor cell differentiation	158	GO:0002244	GO:0002244	0.537573329379739	0.051857013437896	BP		0.248198898353247
striated muscle contraction	164	GO:0006941	GO:0006941	0.536871578762241	0.05193056397983	BP		0.24822832754132
gamma-tubulin complex	18	GO:0000930	GO:0000930	0.610718344124892	0.051960718582483	CC		0.24822832754132
regulation of actin filament bundle assembly	89	GO:0032231	GO:0032231	0.54991002245951	0.05197257812906	BP		0.24822832754132
Golgi cisterna membrane	71	GO:0032580	GO:0032580	0.555772358039114	0.052198038733308	CC		0.249130330728538
DNA methylation involved in gamete generation	20	GO:0043046	GO:0043046	0.604795084780669	0.052371388531829	BP		0.249782530026371
nuclear euchromatin	24	GO:0005719	GO:0005719	0.595493144727506	0.052706535525504	CC		0.251204958534018
regulation of stress fiber assembly	78	GO:0051492	GO:0051492	0.552999817973283	0.052931294558662	BP		0.252099643643283
histone methyltransferase activity (H3-K4 specific)	13	GO:0042800	GO:0042800	0.629487707297506	0.052994017033828	MF		0.252221874078486
protein kinase B binding	11	GO:0043422	GO:0043422	0.640517413431793	0.053293846927255	MF		0.253471643736476
positive regulation of chromatin silencing	14	GO:0031937	GO:0031937	0.624427757790826	0.053491095042428	BP		0.254232117918131
calcium channel inhibitor activity	11	GO:0019855	GO:0019855	0.640311595649137	0.053550801509693	MF		0.254338279884835
INO80-type complex	22	GO:0097346	GO:0097346	0.59913865742908	0.053751686589101	CC		0.255114350715078
negative regulation of B cell proliferation	14	GO:0030889	GO:0030889	0.623971924596367	0.054136766827365	BP		0.256762951238361
regulation of deoxyribonuclease activity	10	GO:0032070	GO:0032070	0.64662824998285	0.054182150333294	BP		0.256799244546237
nuclear lamina	11	GO:0005652	GO:0005652	0.639700379203672	0.054319667348588	CC		0.25727185523625
inositol phosphate metabolic process	68	GO:0043647	GO:0043647	0.556229565316036	0.054531377430787	BP		0.258094961609134
dentate gyrus development	15	GO:0021542	GO:0021542	0.619402507091225	0.054683662692442	BP		0.25863586399219
activation of cysteine-type endopeptidase activity involved in apoptotic process	73	GO:0006919	GO:0006919	0.554211238652902	0.054753000408034	BP		0.258783972761858
hepaticobiliary system development	133	GO:0061008	GO:0061008	0.540222494800721	0.054857005463543	BP		0.259095613591166
5'-3' exonuclease activity	16	GO:0008409	GO:0008409	0.615469082423993	0.054907601376383	MF		0.259154739922094
hepatocyte proliferation	18	GO:0072574	GO:0072574	0.608811708269461	0.055007112445035	BP	epithelial cell proliferation involved in liver morphogenesis	0.259444495704025
regulation of morphogenesis of an epithelium	179	GO:1905330	GO:1905330	0.534677351812618	0.055108392153216	BP		0.259742186284481
protein transport within plasma membrane	14	GO:0099632	GO:0099632	0.623241611198792	0.055184070249423	BP	neurotransmitter receptor transport	0.259918880358181
labyrinthine layer blood vessel development	19	GO:0060716	GO:0060716	0.60576172721755	0.055261733679966	BP		0.26000289306313
telomere maintenance via semi-conservative replication	27	GO:0032201	GO:0032201	0.588736263736264	0.05527831123455	BP		0.26000289306313
deoxyribonucleoside monophosphate metabolic process	10	GO:0009162	GO:0009162	0.645249365438705	0.055862253627492	BP		0.262568023610988
neurotrophin receptor binding	10	GO:0005165	GO:0005165	0.645091582630171	0.056057096802083	MF		0.263302001956503
protein kinase activator activity	68	GO:0030295	GO:0030295	0.555672485951471	0.056307939304615	MF		0.264297817177386
regulation of double-strand break repair via nonhomologous end joining	22	GO:2001032	GO:2001032	0.597584495833723	0.056564480998528	BP		0.265030985497822
Hsp70 protein binding	41	GO:0030544	GO:0030544	0.571522470346386	0.056580798552881	MF		0.265030985497822
positive regulation of protein localization to plasma membrane	53	GO:1903078	GO:1903078	0.562932460255848	0.056580961200167	BP		0.265030985497822
regulation of interferon-beta production	48	GO:0032648	GO:0032648	0.566075154183002	0.056696944471751	BP		0.265391612155938
regulation of cell cycle checkpoint	30	GO:1901976	GO:1901976	0.583458130109226	0.05684743662084	BP		0.265875997815252
fibroblast growth factor binding	21	GO:0017134	GO:0017134	0.599703811223789	0.056878556100354	MF		0.265875997815252
negative regulation of cellular response to insulin stimulus	27	GO:1900077	GO:1900077	0.587914631664632	0.056948040748397	BP		0.266018095630467
pigment accumulation	12	GO:0043476	GO:0043476	0.631640937678674	0.057173425895616	BP	cellular pigment accumulation	0.266887748042223
guanosine-containing compound biosynthetic process	12	GO:1901070	GO:1901070	0.631555174385363	0.057291507898203	BP		0.267255656446314
activation of GTPase activity	46	GO:0090630	GO:0090630	0.567253612723244	0.057335992618234	BP		0.267279976547739
liver development	130	GO:0001889	GO:0001889	0.54005884825557	0.057620467420857	BP		0.268422245904416
protein deacylation	86	GO:0035601	GO:0035601	0.549071996638564	0.058009451837466	BP		0.270049472780979
centromeric sister chromatid cohesion	10	GO:0070601	GO:0070601	0.64347259381217	0.058087457473077	BP		0.270068796338193
establishment of mitochondrion localization, microtubule-mediated	19	GO:0034643	GO:0034643	0.604114280759559	0.058092964713358	BP	mitochondrion transport along microtubule	0.270068796338193
positive regulation of calcium ion-dependent exocytosis	22	GO:0045956	GO:0045956	0.596726274069219	0.058166717531048	BP		0.270227084994069
ATPase binding	77	GO:0051117	GO:0051117	0.551742193024068	0.058370300177191	MF		0.270987901095471
IRES-dependent viral translational initiation	10	GO:0075522	GO:0075522	0.64308156685189	0.058586402627991	BP		0.271758353713162
positive regulation of proteasomal ubiquitin-dependent protein catabolic process	68	GO:0032436	GO:0032436	0.554966514465832	0.058624515482102	BP		0.271758353713162
p53 binding	65	GO:0002039	GO:0002039	0.556202260760861	0.058665624604819	MF		0.271758353713162
SH3 domain binding	121	GO:0017124	GO:0017124	0.541265183793746	0.058695971195761	MF		0.271758353713162
protein insertion into mitochondrial membrane involved in apoptotic signaling pathway	29	GO:0001844	GO:0001844	0.583861936321302	0.059050689039196	BP		0.273214812780941
positive regulation of mitochondrial membrane potential	10	GO:0010918	GO:0010918	0.64266995952528	0.05911523658671	BP		0.273327649598604
positive regulation of protein homodimerization activity	11	GO:0090073	GO:0090073	0.635933290090809	0.059252873358174	BP		0.273778042142385
negative regulation of stem cell proliferation	13	GO:2000647	GO:2000647	0.624996041422554	0.059330591160681	BP		0.2739511556578
regulation of cellular response to osmotic stress	10	GO:0106049	GO:0106049	0.642429855251423	0.059425447771641	BP		0.274203116972059
positive regulation of protein localization to nucleus	74	GO:1900182	GO:1900182	0.552440402919284	0.059539296522111	BP		0.274542311740843
negative regulation of calcium-mediated signaling	29	GO:0050849	GO:0050849	0.583594279244496	0.059639777013873	BP		0.274819446415991
pyrimidine-containing compound catabolic process	35	GO:0072529	GO:0072529	0.575985627896018	0.059937410532098	BP		0.275978015376242
negative regulation of multi-organism process	174	GO:0043901	GO:0043901	0.534231548625881	0.059999392529426	BP		0.275978015376242
peptidase complex	72	GO:1905368	GO:1905368	0.553017950778888	0.060034387298623	CC		0.275978015376242
positive regulation of proteasomal protein catabolic process	91	GO:1901800	GO:1901800	0.547185430463576	0.060053400054689	BP		0.275978015376242
DNA binding, bending	18	GO:0008301	GO:0008301	0.605635252934313	0.060393893177192	MF		0.277292554803463
positive regulation of transcription by RNA polymerase I	22	GO:0045943	GO:0045943	0.595549730050245	0.060420931350799	BP		0.277292554803463
positive regulation of DNA binding	61	GO:0043388	GO:0043388	0.557441377022095	0.060476750465903	BP		0.277361700586884
mitotic chromosome condensation	15	GO:0007076	GO:0007076	0.61551834568579	0.060695618864363	BP		0.277976149771509
vascular endothelial growth factor receptor binding	11	GO:0005172	GO:0005172	0.634854305957489	0.060728751586298	MF		0.277976149771509
Cdc42 protein signal transduction	10	GO:0032488	GO:0032488	0.641428277423338	0.060733255173411	BP		0.277976149771509
positive regulation of dendrite morphogenesis	33	GO:0050775	GO:0050775	0.577829275300761	0.060936877721664	BP		0.278249293298891
regulation of JNK cascade	167	GO:0046328	GO:0046328	0.534756700191849	0.060940538535331	BP		0.278249293298891
regulation of telomerase activity	48	GO:0051972	GO:0051972	0.564557683930577	0.060960211531908	BP		0.278249293298891
type I interferon signaling pathway	89	GO:0060337	GO:0060337	0.547469546361296	0.060990465477253	BP	cellular response to type I interferon	0.278249293298891
regulation of retinoic acid receptor signaling pathway	16	GO:0048385	GO:0048385	0.611673014892595	0.060997347282096	BP		0.278249293298891
long-chain fatty acid import	10	GO:0044539	GO:0044539	0.64111271180627	0.061149934686892	BP		0.278758510032811
regulation of fibroblast migration	30	GO:0010762	GO:0010762	0.581486570035035	0.061241659165835	BP		0.27898978064436
regulation of vascular smooth muscle cell proliferation	50	GO:1904705	GO:1904705	0.563140950677581	0.061305263289531	BP	vascular smooth muscle cell proliferation	0.279092723711401
3',5'-cyclic-GMP phosphodiesterase activity	12	GO:0047555	GO:0047555	0.628604917095483	0.061471585552503	MF		0.279662841758246
neurotransmitter receptor transport to plasma membrane	13	GO:0098877	GO:0098877	0.623518172509527	0.061540675551985	BP	neurotransmitter receptor transport to postsynaptic membrane	0.279790138815506
regulation of ryanodine-sensitive calcium-release channel activity	25	GO:0060314	GO:0060314	0.589026232660349	0.061709388213618	BP		0.280369890642114
positive regulation of telomerase RNA localization to Cajal body	15	GO:1904874	GO:1904874	0.614740598407906	0.061959349274288	BP		0.281053809343594
9+2 motile cilium	89	GO:0097729	GO:0097729	0.547222321250045	0.061968369814842	CC		0.281053809343594
negative regulation of adherens junction organization	19	GO:1903392	GO:1903392	0.601950200872858	0.061983803676864	BP		0.281053809343594
lateral ventricle development	11	GO:0021670	GO:0021670	0.633563267139008	0.062532292558894	BP		0.283352052700287
maintenance of protein location in cell	57	GO:0032507	GO:0032507	0.558662658021516	0.062865069305123	BP		0.28467043359326
positive regulation of heart rate	23	GO:0010460	GO:0010460	0.59221367756111	0.062923855809316	BP		0.284747182605189
GTP-dependent protein binding	22	GO:0030742	GO:0030742	0.594223387323284	0.063043502344535	MF		0.285099054456415
RNA localization to Cajal body	19	GO:0090670	GO:0090670	0.60134685973583	0.063104041343878	BP	telomerase RNA localization to Cajal body, telomerase RNA localization, RNA localization to nucleus	0.285183336909981
hepatocyte apoptotic process	12	GO:0097284	GO:0097284	0.62746140651801	0.063154422619979	BP		0.285221632615512
dendritic spine morphogenesis	53	GO:0060997	GO:0060997	0.560685289665612	0.063309264753444	BP		0.285731336811631
regulation of cysteine-type endopeptidase activity involved in apoptotic process	191	GO:0043281	GO:0043281	0.532091884162122	0.063474933589609	BP		0.286289196826294
intra-Golgi vesicle-mediated transport	17	GO:0006891	GO:0006891	0.606879567200937	0.063557913564089	BP		0.286473615706746
transmembrane receptor protein tyrosine kinase adaptor activity	10	GO:0005068	GO:0005068	0.639274199080744	0.063622125184717	MF		0.286512204676038
M band	20	GO:0031430	GO:0031430	0.598500034324157	0.063650669037639	CC		0.286512204676038
skeletal muscle adaptation	24	GO:0043501	GO:0043501	0.589908214882465	0.063696823403343	BP		0.286530456102548
leading edge membrane	153	GO:0031256	GO:0031256	0.535757076836554	0.06375168093779	CC		0.286587807438968
cellular response to interferon-beta	18	GO:0035458	GO:0035458	0.603682857818351	0.063904386145676	BP		0.287084654856417
cellular component assembly involved in morphogenesis	89	GO:0010927	GO:0010927	0.546712371020567	0.064024100258104	BP		0.287154751785284
N-terminal protein amino acid modification	27	GO:0031365	GO:0031365	0.584620472120472	0.064044245784255	BP		0.287154751785284
negative regulation of Ras protein signal transduction	45	GO:0046580	GO:0046580	0.565586271183851	0.064046563798128	BP		0.287154751785284
manganese ion binding	58	GO:0030145	GO:0030145	0.557777429682846	0.064108322763922	MF		0.287242425761193
pronucleus	15	GO:0045120	GO:0045120	0.613294903467838	0.064362854389555	CC		0.288098028434852
mitochondrial DNA metabolic process	18	GO:0032042	GO:0032042	0.603419742070301	0.064389374387278	BP		0.288098028434852
negative regulation of interleukin-1 beta secretion	13	GO:0050713	GO:0050713	0.621649723955199	0.064426270831303	BP		0.288098028434852
filamentous actin	19	GO:0031941	GO:0031941	0.600588167288072	0.064535029984951	CC		0.28839488777254
photoreceptor cell development	43	GO:0042461	GO:0042461	0.566764525289738	0.064975967639194	BP		0.290174826609154
npBAF complex	12	GO:0071564	GO:0071564	0.626186392224128	0.065072852352531	CC		0.290416939745133
mitochondrial outer membrane	168	GO:0005741	GO:0005741	0.533887991704068	0.065175577581316	CC		0.29068478441575
keratinocyte migration	19	GO:0051546	GO:0051546	0.600201595421833	0.065273782859962	BP		0.29093213238042
negative regulation of insulin receptor signaling pathway	25	GO:0046627	GO:0046627	0.58730668864167	0.065416616811121	BP		0.291377941110269
cardiac muscle cell development	66	GO:0055013	GO:0055013	0.553687136498238	0.065853863506455	BP		0.292950755513857
regulation of transcription involved in G1/S transition of mitotic cell cycle	28	GO:0000083	GO:0000083	0.582317761227714	0.065855811921276	BP		0.292950755513857
proteoglycan metabolic process	79	GO:0006029	GO:0006029	0.54903623666384	0.066078832295817	BP		0.293750837756585
positive regulation of T cell migration	28	GO:2000406	GO:2000406	0.582197560664488	0.066138215005809	BP		0.293822905567581
calcium ion regulated exocytosis	127	GO:0017156	GO:0017156	0.538670347741802	0.066421846022407	BP		0.294890465772019
formation of cytoplasmic translation initiation complex	14	GO:0001732	GO:0001732	0.615786532824891	0.066812191842515	BP	eukaryotic 48S preinitiation complex	0.296430102790192
phagolysosome assembly	11	GO:0001845	GO:0001845	0.630388683764095	0.067144624940585	BP		0.297597632822756
negative regulation of JNK cascade	36	GO:0046329	GO:0046329	0.572129445093503	0.067162792244454	BP		0.297597632822756
forebrain regionalization	24	GO:0021871	GO:0021871	0.588234452608208	0.067316346874271	BP		0.298083966705458
pyrimidine ribonucleoside catabolic process	14	GO:0046133	GO:0046133	0.615448334003196	0.067381547506277	BP		0.298178681617504
14-3-3 protein binding	30	GO:0071889	GO:0071889	0.578752490210895	0.067769225148887	MF		0.299699380353038
positive regulation of stress-activated protein kinase signaling cascade	149	GO:0070304	GO:0070304	0.535441987075493	0.067991126916436	BP		0.300485460904716
melanosome organization	23	GO:0032438	GO:0032438	0.589673166712442	0.068307988748772	BP		0.301689923052653
energy coupled proton transport, down electrochemical gradient	20	GO:0015985	GO:0015985	0.596032127411272	0.068556868094698	BP	ATP synthesis coupled proton transport	0.302592765403707
female gamete generation	131	GO:0007292	GO:0007292	0.537636185825268	0.06871369556087	BP		0.303088406991108
negative regulation of cell size	10	GO:0045792	GO:0045792	0.635617753996021	0.06876922543596	BP		0.303136883625092
kinase activator activity	74	GO:0019209	GO:0019209	0.549876066378512	0.06911243709041	MF		0.304452586949728
nBAF complex	14	GO:0071565	GO:0071565	0.614374920351727	0.069213490695909	CC		0.30470052889803
DNA polymerase binding	15	GO:0070182	GO:0070182	0.610472138347516	0.069263914164667	MF		0.304725403881529
embryonic placenta development	87	GO:0001892	GO:0001892	0.545943717796274	0.06943796624527	BP		0.305293797329009
labyrinthine layer development	46	GO:0060711	GO:0060711	0.562997282048062	0.069744418554899	BP		0.306279115125234
regulation of intrinsic apoptotic signaling pathway by p53 class mediator	30	GO:1902253	GO:1902253	0.577962492271759	0.06975207588071	BP		0.306279115125234
high-density lipoprotein particle assembly	12	GO:0034380	GO:0034380	0.623116066323613	0.06987802607108	BP		0.306590676280749
response to cold	41	GO:0009409	GO:0009409	0.566659847816682	0.069913125123086	BP		0.306590676280749
establishment of mitochondrion localization	22	GO:0051654	GO:0051654	0.590890366070593	0.070025159454328	BP		0.306697468934074
protein insertion into mitochondrial membrane	31	GO:0051204	GO:0051204	0.576574120859151	0.0700705137676	BP		0.306697468934074
piRNA metabolic process	18	GO:0034587	GO:0034587	0.600445390135829	0.070072665911326	BP		0.306697468934074
positive regulation of protein depolymerization	19	GO:1901881	GO:1901881	0.597672620595971	0.070269657950017	BP		0.307362012858492
negative regulation of actin filament bundle assembly	23	GO:0032232	GO:0032232	0.58870293636483	0.070455587177217	BP		0.307977345104778
regulation of response to osmotic stress	13	GO:0047484	GO:0047484	0.617912826846544	0.070511662739085	BP		0.308024631965475
attachment of mitotic spindle microtubules to kinetochore	10	GO:0051315	GO:0051315	0.634362351649859	0.070608620419733	BP		0.308250333917063
NADH metabolic process	35	GO:0006734	GO:0006734	0.571817325060865	0.07078359751945	BP		0.308816131229089
protein kinase C activity	16	GO:0004697	GO:0004697	0.606049687735914	0.070973179680038	MF		0.309444882064277
regulation of exit from mitosis	16	GO:0007096	GO:0007096	0.606011083659323	0.071045753980611	BP		0.309520663510459
cellular response to interferon-gamma	150	GO:0071346	GO:0071346	0.534775922975687	0.071085820977488	BP		0.309520663510459
muscle fiber development	52	GO:0048747	GO:0048747	0.558852636871213	0.071126993495498	BP		0.309520663510459
regulation of microtubule-based movement	26	GO:0060632	GO:0060632	0.583027370267258	0.071436637454378	BP		0.310669491702554
calcium import into the mitochondrion	10	GO:0036444	GO:0036444	0.633559717362969	0.071804295868163	BP		0.312068989577724
positive regulation of protein export from nucleus	21	GO:0046827	GO:0046827	0.592151978187952	0.071906524879886	BP		0.312313853434911
aminoacyl-tRNA synthetase multienzyme complex	11	GO:0017101	GO:0017101	0.62715796826664	0.072104231091793	CC		0.312869395385049
regulation of actin cytoskeleton reorganization	34	GO:2000249	GO:2000249	0.572360257234207	0.072168298231895	BP		0.312869395385049
DNA polymerase complex	12	GO:0042575	GO:0042575	0.621686678101773	0.072206198875118	CC		0.312869395385049
regulation of cell growth involved in cardiac muscle cell development	18	GO:0061050	GO:0061050	0.599370047513365	0.07221980827753	BP		0.312869395385049
regulation of postsynaptic membrane organization	14	GO:1901626	GO:1901626	0.612634911921263	0.072264279980208	BP		0.312869395385049
acid-amino acid ligase activity	14	GO:0016881	GO:0016881	0.612541784709492	0.072430421723935	MF		0.313284373414837
regulation of lymphocyte chemotaxis	25	GO:1901623	GO:1901623	0.584224694410109	0.072490565626059	BP		0.313284373414837
negative regulation of extrinsic apoptotic signaling pathway via death domain receptors	36	GO:1902042	GO:1902042	0.570210905703312	0.072498220412631	BP		0.313284373414837
negative regulation of cellular protein catabolic process	80	GO:1903363	GO:1903363	0.547150513545185	0.072581597196366	BP		0.313445653882275
autophagy of mitochondrion	55	GO:0000422	GO:0000422	0.556767509946701	0.072756343579568	BP	mitochondrion disassembly	0.313888455060075
positive regulation of sequestering of calcium ion	15	GO:0051284	GO:0051284	0.608532345136792	0.07279521787659	BP		0.313888455060075
histone deacetylase binding	101	GO:0042826	GO:0042826	0.541943535786687	0.072822490528924	MF		0.313888455060075
DNA damage response, signal transduction by p53 class mediator	106	GO:0030330	GO:0030330	0.54092806058166	0.072927556979376	BP		0.314142375190909
cell redox homeostasis	69	GO:0045454	GO:0045454	0.550635792449553	0.073038320131674	BP		0.314281859428957
ubiquitin-like protein binding	70	GO:0032182	GO:0032182	0.550262254106023	0.073087587469708	MF		0.314281859428957
positive regulation of focal adhesion assembly	25	GO:0051894	GO:0051894	0.583966488119764	0.073108841973416	BP		0.314281859428957
vacuolar transport	101	GO:0007034	GO:0007034	0.541876554078161	0.073144646684612	BP		0.314281859428957
regulation of extent of cell growth	90	GO:0061387	GO:0061387	0.544283491603627	0.073425400234841	BP		0.315229761972318
cartilage development	181	GO:0051216	GO:0051216	0.531314070334414	0.073495466007775	BP		0.315229761972318
cytochrome complex	14	GO:0070069	GO:0070069	0.611943809981277	0.073504206913028	CC		0.315229761972318
meiotic spindle organization	12	GO:0000212	GO:0000212	0.620771869639794	0.073727140360758	BP		0.315895878659267
Rap protein signal transduction	14	GO:0032486	GO:0032486	0.611806569879719	0.073752358388125	BP		0.315895878659267
ribonucleoside biosynthetic process	32	GO:0042455	GO:0042455	0.573967279285469	0.073837145100864	BP		0.316060131796529
regulation of the force of heart contraction	27	GO:0002026	GO:0002026	0.580430911680912	0.074040444525605	BP		0.316731153640016
heparin binding	146	GO:0008201	GO:0008201	0.534719923201918	0.074100132659588	MF		0.316787376181629
response to gamma radiation	55	GO:0010332	GO:0010332	0.556369641918775	0.074177831196141	BP		0.316920476535428
natural killer cell chemotaxis	11	GO:0035747	GO:0035747	0.625798323520607	0.074273570224266	BP		0.317130438485791
motile cilium assembly	21	GO:0044458	GO:0044458	0.591027376212053	0.074383714465156	BP		0.317291337872018
RNAi effector complex	11	GO:0031332	GO:0031332	0.625717243788045	0.074404492395495	CC		0.317291337872018
response to mitochondrial depolarisation	20	GO:0098780	GO:0098780	0.593227843756436	0.074480231690847	BP		0.317415439504011
sperm axoneme assembly	12	GO:0007288	GO:0007288	0.620280160091481	0.074554702574407	BP		0.317533983555325
interferon-beta production	50	GO:0032608	GO:0032608	0.558959895439224	0.074697314593603	BP		0.317942415962516
embryonic hindlimb morphogenesis	27	GO:0035116	GO:0035116	0.580140923890924	0.074774163227172	BP		0.318070596827581
fibroblast migration	38	GO:0010761	GO:0010761	0.567535840770391	0.074902220529778	BP		0.318254746188684
positive regulation of mitotic nuclear division	48	GO:0045840	GO:0045840	0.560108443955339	0.074910976108474	BP		0.318254746188684
pyrimidine deoxyribonucleotide metabolic process	16	GO:0009219	GO:0009219	0.603810651293666	0.075277410733494	BP		0.319612013382508
chondrocyte differentiation	97	GO:0002062	GO:0002062	0.542240293697039	0.0754627692299	BP		0.320199256470512
cytokine activity	154	GO:0005125	GO:0005125	0.533579702359582	0.075524268136381	MF		0.320260541393274
chromatoid body	13	GO:0033391	GO:0033391	0.614914864194403	0.075705637562283	CC		0.320696285759408
protein localization to nucleoplasm	12	GO:1990173	GO:1990173	0.619594053744997	0.075721265238814	BP		0.320696285759408
vesicle-mediated transport in synapse	173	GO:0099003	GO:0099003	0.531650747386733	0.075861469194239	BP		0.321090273218899
cerebellum morphogenesis	35	GO:0021587	GO:0021587	0.57001295845441	0.075922195286377	BP		0.321147583044799
positive regulation of vascular endothelial cell proliferation	15	GO:1905564	GO:1905564	0.606844176045384	0.075979221528525	BP		0.321189181194499
photoreceptor inner segment	43	GO:0001917	GO:0001917	0.563136400849387	0.076071811655626	CC		0.321380974629542
MAP kinase kinase activity	13	GO:0004708	GO:0004708	0.614450391107452	0.076535767273257	MF		0.323140466539568
cytoskeletal adaptor activity	13	GO:0008093	GO:0008093	0.614281491803106	0.076839343295881	MF		0.324221060428867
mitochondrial calcium ion homeostasis	24	GO:0051560	GO:0051560	0.583999977110943	0.077182628691965	BP		0.325267898377177
nucleotide-excision repair, DNA damage recognition	22	GO:0000715	GO:0000715	0.587728989170802	0.077183023197053	BP		0.325267898377177
positive regulation of mRNA splicing, via spliceosome	15	GO:0048026	GO:0048026	0.60612132857535	0.077374549323373	BP		0.325873256618116
lens fiber cell differentiation	28	GO:0070306	GO:0070306	0.577625033116482	0.077592570041276	BP		0.32658938262271
eye photoreceptor cell development	32	GO:0042462	GO:0042462	0.572399948471316	0.07822438568591	BP		0.329045221865451
positive regulation of cellular senescence	12	GO:2000774	GO:2000774	0.618084619782733	0.078336582606203	BP		0.329313638800381
GMP metabolic process	14	GO:0046037	GO:0046037	0.609233317975512	0.078524605576498	BP		0.329709746697515
peroxisomal membrane	58	GO:0005778	GO:0005778	0.553723705976869	0.07861578285607	CC	microbody membrane	0.329709746697515
heparan sulfate proteoglycan biosynthetic process	20	GO:0015012	GO:0015012	0.591367474428503	0.078620324759016	BP		0.329709746697515
diacylglycerol kinase activity	11	GO:0004143	GO:0004143	0.623160113761102	0.078624584027339	MF		0.329709746697515
positive regulation of mRNA metabolic process	68	GO:1903313	GO:1903313	0.549589179290423	0.078801136097832	BP		0.330077541483887
nuclear inclusion body	12	GO:0042405	GO:0042405	0.617815894797027	0.0788092866458	CC		0.330077541483887
postsynaptic cytosol	17	GO:0099524	GO:0099524	0.598970487302677	0.078874900141175	CC		0.330149182263735
negative regulation of JUN kinase activity	13	GO:0043508	GO:0043508	0.613030581330293	0.079116266098419	BP		0.330817112992034
negative regulation of double-strand break repair	29	GO:2000780	GO:2000780	0.575709054388865	0.07914308845453	BP		0.330817112992034
invadopodium	16	GO:0071437	GO:0071437	0.601863290096768	0.07918029342698	CC		0.330817112992034
protein heterooligomerization	103	GO:0051291	GO:0051291	0.540178248244464	0.079642187500029	BP		0.332542777990918
mast cell migration	10	GO:0097531	GO:0097531	0.628400905536118	0.079863030111357	BP		0.33326044324825
translation elongation factor activity	12	GO:0003746	GO:0003746	0.616901086335049	0.080434699062085	MF		0.335260511858371
negative regulation of glial cell proliferation	14	GO:0060253	GO:0060253	0.608233425807021	0.080440848643068	BP		0.335260511858371
macromolecule deacylation	87	GO:0098732	GO:0098732	0.543472849782005	0.080697546484347	BP		0.336124541843613
cyclic-nucleotide phosphodiesterase activity	22	GO:0004112	GO:0004112	0.586152981930531	0.080952833065902	MF	3',5'-cyclic-nucleotide phosphodiesterase activity	0.336981640273105
nuclear transcription factor complex	139	GO:0044798	GO:0044798	0.534369846315639	0.081215467133601	CC		0.337868257525239
midbrain dopaminergic neuron differentiation	17	GO:1904948	GO:1904948	0.597791594331624	0.081379451138413	BP		0.338343643523541
negative regulation of anion transmembrane transport	13	GO:1903960	GO:1903960	0.611732167928133	0.081533316493062	BP		0.338776405404015
RNA polymerase II basal transcription factor binding	18	GO:0001091	GO:0001091	0.594942839057054	0.081593584611196	MF		0.338819973681392
positive regulation of cell morphogenesis involved in differentiation	136	GO:0010770	GO:0010770	0.534663284038963	0.081700051495443	BP		0.339055213706086
positive regulation of stress-activated MAPK cascade	148	GO:0032874	GO:0032874	0.533214754334638	0.081873420465964	BP		0.339567641493816
regulation of cartilage development	65	GO:0061035	GO:0061035	0.549925312258324	0.08208761184404	BP		0.340187848751698
positive regulation of membrane potential	15	GO:0045838	GO:0045838	0.603733186933846	0.082122926167946	BP		0.340187848751698
cellular response to reactive oxygen species	152	GO:0034614	GO:0034614	0.532717900570616	0.082269037308685	BP		0.340585807738996
synaptonemal complex assembly	18	GO:0007130	GO:0007130	0.594611084418209	0.082331345296962	BP		0.340617454570014
GTP-Rho binding	12	GO:0017049	GO:0017049	0.615826186392224	0.08237677493715	MF		0.340617454570014
peptidyl-lysine dimethylation	16	GO:0018027	GO:0018027	0.600263365589184	0.082499952104695	BP		0.340919656359776
lipid phosphorylation	38	GO:0046834	GO:0046834	0.565088575449208	0.082563470769514	BP		0.340975110471671
regulation of mitochondrial membrane permeability involved in apoptotic process	59	GO:1902108	GO:1902108	0.5521459437766	0.083081059056656	BP		0.342904601540085
positive regulation of ubiquitin-protein transferase activity	28	GO:0051443	GO:0051443	0.575542374378146	0.083284136771072	BP		0.34325275670646
establishment of protein localization to mitochondrial membrane	12	GO:0090151	GO:0090151	0.615317324185249	0.08330838447658	BP		0.34325275670646
scaffold protein binding	58	GO:0097110	GO:0097110	0.552529898585706	0.083330440504423	MF		0.34325275670646
general transcription initiation factor activity	15	GO:0140223	GO:0140223	0.603124714063501	0.083367147639697	MF		0.34325275670646
phosphatase activator activity	11	GO:0019211	GO:0019211	0.620284901706417	0.083583538097675	MF		0.343935647093578
Tat protein binding	10	GO:0030957	GO:0030957	0.625924401454346	0.083966653455697	MF		0.345303349498172
regulation of establishment of cell polarity	21	GO:2000114	GO:2000114	0.586888579405399	0.084063512226247	BP		0.345492913171399
stem cell proliferation	111	GO:0072089	GO:0072089	0.537871942127261	0.084276421185711	BP		0.346158915262491
positive regulation of epidermal cell differentiation	22	GO:0045606	GO:0045606	0.584751739849577	0.084419878955946	BP		0.346336168581651
nucleoside catabolic process	32	GO:0009164	GO:0009164	0.570295860529028	0.084421349350126	BP		0.346336168581651
regulation of DNA-templated transcription in response to stress	115	GO:0043620	GO:0043620	0.537132573845747	0.084735206308679	BP		0.347414345865584
seminiferous tubule development	12	GO:0072520	GO:0072520	0.614219554030875	0.085345088701544	BP		0.349693562802677
podosome assembly	18	GO:0071800	GO:0071800	0.593257372960853	0.085393873255664	BP		0.349693562802677
hematopoietic stem cell differentiation	83	GO:0060218	GO:0060218	0.543515208102127	0.085445863556565	BP		0.349696059751042
negative regulation of peptidyl-tyrosine phosphorylation	47	GO:0050732	GO:0050732	0.557686792121514	0.085701071118904	BP		0.350529741607728
exogenous drug catabolic process	12	GO:0042738	GO:0042738	0.613996569468268	0.085763314190365	BP		0.350573643471245
neuron projection extension	147	GO:1990138	GO:1990138	0.532697815968493	0.085920161084116	BP		0.351003971391651
regulation of hepatocyte proliferation	14	GO:2000345	GO:2000345	0.605292566487928	0.086281569195622	BP		0.352268962174808
maintenance of protein localization in organelle	34	GO:0072595	GO:0072595	0.567592693643114	0.086339460441356	BP		0.352293985469944
glial cell apoptotic process	15	GO:0034349	GO:0034349	0.60166529417147	0.08640908651049	BP		0.352366832109283
cytidine catabolic process	12	GO:0006216	GO:0006216	0.613619210977702	0.08647457244621	BP	cytidine deamination, cytidine metabolic process	0.352422718604133
exonuclease activity, active with either ribo- or deoxyribonucleic acids and producing 5'-phosphomonoesters	44	GO:0016796	GO:0016796	0.559383458458615	0.086535236552414	MF		0.352458898848432
negative regulation of G1/S transition of mitotic cell cycle	101	GO:2000134	GO:2000134	0.539228726130931	0.086771715229929	BP		0.353210702066327
positive regulation of sodium ion transmembrane transporter activity	14	GO:2000651	GO:2000651	0.605018086284812	0.086842481739641	BP		0.353287466060965
ligase activity, forming carbon-nitrogen bonds	40	GO:0016879	GO:0016879	0.562138241561834	0.087002426999954	MF		0.3535279125743
positive regulation of protein localization to chromosome, telomeric region	12	GO:1904816	GO:1904816	0.613339050886221	0.087005473635315	BP		0.3535279125743
negative regulation of androgen receptor signaling pathway	15	GO:0060766	GO:0060766	0.600988196541312	0.087848260901481	BP		0.356649927632282
response to dsRNA	38	GO:0043331	GO:0043331	0.563489623088583	0.087878626012245	BP		0.356649927632282
intrinsic component of mitochondrial membrane	63	GO:0098573	GO:0098573	0.549284599546235	0.088169799182833	CC		0.357526252721492
DNA deamination	11	GO:0045006	GO:0045006	0.617721534776968	0.088199614798617	BP		0.357526252721492
class I DNA-(apurinic or apyrimidinic site) endonuclease activity	10	GO:0140078	GO:0140078	0.623399876517802	0.08831078560619	MF		0.357759155005396
intraciliary transport particle B	16	GO:0030992	GO:0030992	0.597552501544163	0.088362200935068	CC		0.357759155005396
ERBB2 signaling pathway	32	GO:0038128	GO:0038128	0.568966849879766	0.088521103232779	BP		0.358039721734336
regulation of insulin receptor signaling pathway	54	GO:0046626	GO:0046626	0.553126855610858	0.088536710502334	BP		0.358039721734336
regulation of microtubule binding	10	GO:1904526	GO:1904526	0.623111751389175	0.088817042205852	BP		0.358960088630066
tertiary alcohol metabolic process	18	GO:1902644	GO:1902644	0.591735877548219	0.088936945541161	BP		0.359231365788214
regulation of protein localization to cell periphery	112	GO:1904375	GO:1904375	0.536864668147052	0.089114938808512	BP		0.359652894596987
histone H4-K16 acetylation	20	GO:0043984	GO:0043984	0.586949955378595	0.089146992827669	BP		0.359652894596987
stem cell division	38	GO:0017145	GO:0017145	0.563032004369987	0.08944580767057	BP		0.360644648700178
sperm flagellum	84	GO:0036126	GO:0036126	0.542407482195802	0.089724325661514	CC		0.36136610678445
regulation of peptidyl-serine phosphorylation	117	GO:0033135	GO:0033135	0.535972451107213	0.08973093159943	BP		0.36136610678445
negative regulation of cell cycle G1/S phase transition	104	GO:1902807	GO:1902807	0.53810701140329	0.08990458735003	BP		0.361851343290542
endosome to melanosome transport	10	GO:0035646	GO:0035646	0.622350277834945	0.090165404203074	BP	endosome to pigment granule transport, pigment granule maturation	0.362686608159646
regulation of cell cycle arrest	106	GO:0071156	GO:0071156	0.537683731317419	0.090278048254941	BP		0.362925219387554
region of cytosol	24	GO:0099522	GO:0099522	0.578921467646318	0.090420622238606	CC		0.363283798675295
oocyte differentiation	49	GO:0009994	GO:0009994	0.555237365272151	0.090591649525558	BP		0.363756204525631
UDP-galactosyltransferase activity	21	GO:0035250	GO:0035250	0.584253610822332	0.090701153084425	MF		0.363981160314029
protein-containing complex scaffold activity	29	GO:0032947	GO:0032947	0.571661037183016	0.090869140364045	MF		0.364440406197814
somatic diversification of immunoglobulins	55	GO:0016445	GO:0016445	0.552011860971399	0.091163278800043	BP		0.365404755896991
flavin adenine dinucleotide binding	67	GO:0050660	GO:0050660	0.547079684223511	0.091461323681568	MF		0.366383619174075
regulation of mitochondrial outer membrane permeabilization involved in apoptotic signaling pathway	43	GO:1901028	GO:1901028	0.558702381866094	0.091523592072036	BP		0.366417392730749
NADH regeneration	27	GO:0006735	GO:0006735	0.573959605209605	0.091763782189384	BP	canonical glycolysis, glucose catabolic process to pyruvate	0.36709778925823
cerebellar cortex development	46	GO:0021695	GO:0021695	0.556689779723301	0.09180141600316	BP		0.36709778925823
insulin-like growth factor receptor binding	15	GO:0005159	GO:0005159	0.59913990301034	0.091867733665943	MF		0.36714726678239
peroxisome	130	GO:0005777	GO:0005777	0.533736651395917	0.092339692844794	CC	microbody	0.368816871773281
GTPase activating protein binding	15	GO:0032794	GO:0032794	0.598897428858999	0.092404988506269	MF		0.368861203386315
regulation of axon extension	76	GO:0030516	GO:0030516	0.544003822871216	0.092525743516295	BP		0.369126735270753
Hsp90 protein binding	37	GO:0051879	GO:0051879	0.562944181294697	0.092657224253623	MF		0.369434720720653
endocytic vesicle lumen	19	GO:0071682	GO:0071682	0.587759039278592	0.092718897658143	CC		0.369464178841521
K63-linked polyubiquitin modification-dependent protein binding	16	GO:0070530	GO:0070530	0.595540800219614	0.092909231280244	MF		0.370005984841043
PML body	99	GO:0016605	GO:0016605	0.538484653269303	0.093100927305755	CC		0.370552579674249
negative regulation of peptidyl-threonine phosphorylation	17	GO:0010801	GO:0010801	0.592583471274577	0.093165422036042	BP		0.370592555451373
diterpenoid biosynthetic process	10	GO:0016102	GO:0016102	0.620648967551622	0.09323279829245	BP		0.370643939940664
regulation of ribosome biogenesis	13	GO:0090069	GO:0090069	0.605646514868417	0.093608247886034	BP		0.371919284945913
dendrite terminus	12	GO:0044292	GO:0044292	0.609897084048027	0.093727893966767	CC		0.372164320846636
receptor tyrosine kinase binding	58	GO:0030971	GO:0030971	0.550046162134708	0.093815415265677	MF		0.372164320846636
hindbrain morphogenesis	39	GO:0021575	GO:0021575	0.560986442757133	0.093833966290454	BP		0.372164320846636
positive regulation of plasma membrane bounded cell projection assembly	95	GO:0120034	GO:0120034	0.539125760855354	0.093974359657924	BP		0.372504072121043
negative regulation of dendritic spine development	13	GO:0061000	GO:0061000	0.605435390737984	0.094049669055507	BP		0.372579020120316
G protein-coupled receptor internalization	15	GO:0002031	GO:0002031	0.598137981517065	0.094102752804411	BP		0.372579020120316
regulation of postsynapse organization	95	GO:0099175	GO:0099175	0.538976132022023	0.094821452474747	BP		0.375134796375858
positive regulation of collateral sprouting	10	GO:0048672	GO:0048672	0.61976401179941	0.094858504931362	BP		0.375134796375858
negative regulation of interleukin-1 secretion	16	GO:0050711	GO:0050711	0.594481332784298	0.095372393948374	BP		0.376948033224524
cysteine-type peptidase activity	145	GO:0008234	GO:0008234	0.531479067279821	0.095691511997881	MF		0.377989803051409
muscle hypertrophy	87	GO:0014896	GO:0014896	0.540528735632184	0.095851961388654	BP		0.378403972860313
regulation of sodium ion transmembrane transport	51	GO:1902305	GO:1902305	0.552811410750321	0.096093797629104	BP		0.379138774877496
kinesin binding	40	GO:0019894	GO:0019894	0.559477899223208	0.096587439976156	MF		0.380740585498495
platelet-derived growth factor receptor-beta signaling pathway	14	GO:0035791	GO:0035791	0.600415641450432	0.096657572008261	BP		0.380740585498495
ventricular cardiac muscle cell differentiation	16	GO:0055012	GO:0055012	0.593932297028344	0.096667606779518	BP		0.380740585498495
ventricular system development	26	GO:0021591	GO:0021591	0.573634524256048	0.096900342046995	BP		0.381436511261914
regulation of muscle adaptation	83	GO:0043502	GO:0043502	0.541120355664245	0.097835856201138	BP		0.384896437748522
regulation of mitochondrion organization	174	GO:0010821	GO:0010821	0.528482029712959	0.097895402618818	BP		0.384908209256889
poly-purine tract binding	21	GO:0070717	GO:0070717	0.581406144772889	0.098302998170891	MF		0.386287647546815
positive regulation of interferon-beta production	30	GO:0032728	GO:0032728	0.568109271599002	0.098371420628057	BP		0.386297588206227
histamine secretion	11	GO:0001821	GO:0001821	0.612382746232911	0.098419044659065	BP		0.386297588206227
regulation of DNA binding	120	GO:0051101	GO:0051101	0.534140342388424	0.098501038539288	BP		0.386396581151813
E-box binding	49	GO:0070888	GO:0070888	0.553281898809875	0.09856277810954	MF		0.386416052887976
apical junction assembly	61	GO:0043297	GO:0043297	0.547756086880957	0.098646749460967	BP		0.386522611877569
cellular response to salt stress	12	GO:0071472	GO:0071472	0.60724413950829	0.099165382272735	BP		0.387854538546445
regulation of PERK-mediated unfolded protein response	10	GO:1903897	GO:1903897	0.617459010770392	0.099190782413007	BP		0.387854538546445
phototransduction, visible light	35	GO:0007603	GO:0007603	0.56283279667007	0.099207710432733	BP		0.387854538546445
negative regulation of bone remodeling	14	GO:0046851	GO:0046851	0.599273607748184	0.099214627036345	BP		0.387854538546445
low-density lipoprotein particle receptor binding	21	GO:0050750	GO:0050750	0.581043264484154	0.099304347122713	MF		0.387982426244079
response to insecticide	17	GO:0017085	GO:0017085	0.58999152166014	0.099481087445494	BP		0.388449960501453
phototransduction	50	GO:0007602	GO:0007602	0.552422095342918	0.099954567425095	BP		0.390049416248579
single-stranded DNA-dependent ATPase activity	12	GO:0043142	GO:0043142	0.606843910806175	0.100005323443105	MF		0.390049416248579
acyl-CoA ligase activity	10	GO:0003996	GO:0003996	0.616910201001578	0.100243277177904	MF		0.390753576444911
negative regulation of developmental growth	85	GO:0048640	GO:0048640	0.540155921698427	0.100505142852306	BP		0.391550087150997
dopaminergic neuron differentiation	35	GO:0071542	GO:0071542	0.562451896646509	0.10057488012832	BP		0.391597616792534
modulation by host of viral transcription	27	GO:0043921	GO:0043921	0.571047008547009	0.100696062910741	BP	modulation by host of symbiont transcription	0.391845285403376
negative regulation of focal adhesion assembly	18	GO:0051895	GO:0051895	0.586866329573447	0.101011446162668	BP		0.39284794433321
NAD+ binding	12	GO:0070403	GO:0070403	0.606249285305889	0.101262810870794	MF		0.393600622950671
ruffle assembly	38	GO:0097178	GO:0097178	0.559665884072336	0.101617102353859	BP		0.394574043200089
extrinsic component of organelle membrane	41	GO:0031312	GO:0031312	0.557444339739699	0.101629194494528	CC		0.394574043200089
'de novo' posttranslational protein folding	18	GO:0051084	GO:0051084	0.586443056413542	0.102114881672553	BP		0.396233685668982
methyl-CpG binding	19	GO:0008327	GO:0008327	0.584106477065811	0.102205939560591	MF		0.396361039686258
positive regulation of lymphocyte migration	34	GO:2000403	GO:2000403	0.56282917207287	0.102480536871272	BP		0.397199620698107
cellular response to starvation	136	GO:0009267	GO:0009267	0.531503010172306	0.102638631788303	BP		0.397559377768833
antioxidant activity	63	GO:0016209	GO:0016209	0.546149121541575	0.102740505239412	MF		0.397559377768833
negative regulation of neurotransmitter secretion	11	GO:0046929	GO:0046929	0.610243488673785	0.102748596164469	BP		0.397559377768833
glucose catabolic process	35	GO:0006007	GO:0006007	0.561821644545669	0.102867151799137	BP		0.397702810202468
hydrogen peroxide-mediated programmed cell death	11	GO:0010421	GO:0010421	0.610168645843728	0.102902534347127	BP	programmed cell death in response to reactive oxygen species	0.397702810202468
regulation of T cell chemotaxis	15	GO:0010819	GO:0010819	0.594217220239729	0.103234839755329	BP		0.398760680689426
lamin binding	13	GO:0005521	GO:0005521	0.601160127096726	0.103321508139849	MF		0.398869077935232
negative regulation of DNA recombination	31	GO:0045910	GO:0045910	0.565504525348155	0.103474801674674	BP		0.399234410542988
positive regulation of extrinsic apoptotic signaling pathway	49	GO:2001238	GO:2001238	0.552064820975852	0.103776547835828	BP		0.400171775960705
ARF guanyl-nucleotide exchange factor activity	16	GO:0005086	GO:0005086	0.59096407247272	0.103894066450701	MF		0.400398083954401
negative regulation of membrane potential	13	GO:0045837	GO:0045837	0.600758991248905	0.104224373760588	BP		0.401361466783419
negative regulation of gene silencing	23	GO:0060969	GO:0060969	0.575764541513918	0.104261985494135	BP		0.401361466783419
striated muscle hypertrophy	85	GO:0014897	GO:0014897	0.539471229120527	0.1043993158426	BP		0.40163053532513
cardiac muscle hypertrophy	82	GO:0003300	GO:0003300	0.540173699565331	0.104449904132454	BP		0.40163053532513
regulation of muscle hypertrophy	59	GO:0014743	GO:0014743	0.547222662958262	0.104937144560894	BP		0.403276231440681
FMN binding	13	GO:0010181	GO:0010181	0.600378967814126	0.105084982511879	MF		0.403616473462668
purine-containing compound salvage	15	GO:0043101	GO:0043101	0.593306798426205	0.105444493032686	BP		0.404768877371948
regulation of meiotic cell cycle	41	GO:0051445	GO:0051445	0.556471815233758	0.105506936553032	BP		0.40478027631338
exocyst	10	GO:0000145	GO:0000145	0.614173012279619	0.105614436476052	CC		0.404964425158314
S100 protein binding	14	GO:0044548	GO:0044548	0.596411171344267	0.105840359183309	MF		0.405518776806046
skeletal muscle organ development	163	GO:0060538	GO:0060538	0.528395499661437	0.105878176077629	BP		0.405518776806046
positive regulation of mitochondrion organization	115	GO:0010822	GO:0010822	0.53363857043286	0.106634246768394	BP		0.408184861364278
deoxyribose phosphate catabolic process	19	GO:0046386	GO:0046386	0.582397612647764	0.106879344652264	BP		0.40889309707887
negative regulation of muscle tissue development	51	GO:1901862	GO:1901862	0.550174279948633	0.107670480041337	BP		0.411297981446049
pteridine-containing compound biosynthetic process	12	GO:0042559	GO:0042559	0.603299028016009	0.107672453216302	BP		0.411297981446049
pigment granule organization	24	GO:0048753	GO:0048753	0.573067591384559	0.107689245215524	BP		0.411297981446049
microbody part	98	GO:0044438	GO:0044438	0.536231567649491	0.107811922392885	CC	peroxisomal part	0.411535582616926
positive regulation of organ growth	48	GO:0046622	GO:0046622	0.551652738611092	0.107938729678112	BP		0.41167913717128
positive regulation of mitochondrial calcium ion concentration	11	GO:0051561	GO:0051561	0.607748727671889	0.107970505414448	BP		0.41167913717128
specification of symmetry	124	GO:0009799	GO:0009799	0.532204535265739	0.108056041234139	BP		0.411774589383845
JNK cascade	198	GO:0007254	GO:0007254	0.525476461747224	0.10872767374269	BP		0.414102153045747
germ cell nucleus	18	GO:0043073	GO:0043073	0.583899604182396	0.108930459146829	CC		0.41464245243474
regulation of establishment or maintenance of cell polarity	23	GO:0032878	GO:0032878	0.574158437123103	0.109166323118265	BP		0.415307990577369
synaptic vesicle exocytosis	100	GO:0016079	GO:0016079	0.535627804238283	0.109368855072001	BP		0.415844436878065
regulation of rhodopsin mediated signaling pathway	26	GO:0022400	GO:0022400	0.569675054016789	0.109433941062459	BP		0.415844436878065
cellular response to corticosteroid stimulus	57	GO:0071384	GO:0071384	0.547095543400828	0.109490630456287	BP		0.415844436878065
chondroitin sulfate biosynthetic process	26	GO:0030206	GO:0030206	0.569622225861495	0.109608692533567	BP		0.416060658886481
regulation of translational fidelity	15	GO:0006450	GO:0006450	0.591563729526947	0.109770076801884	BP		0.416440993708821
lysosomal transport	93	GO:0007041	GO:0007041	0.536833929056295	0.110002914045584	BP		0.417083039607265
reciprocal meiotic recombination	34	GO:0007131	GO:0007131	0.560779867502557	0.110061877627777	BP		0.417083039607265
signaling adaptor activity	78	GO:0035591	GO:0035591	0.540135123910711	0.110371296369818	MF		0.418022839784632
muscle cell apoptotic process	70	GO:0010657	GO:0010657	0.542334602780976	0.110481840211929	BP		0.418208790034698
regulation of cellular response to insulin stimulus	62	GO:1900076	GO:1900076	0.544916995169619	0.11075764222003	BP		0.419019740383283
establishment or maintenance of apical/basal cell polarity	34	GO:0035088	GO:0035088	0.560567661407998	0.110869336973245	BP	establishment or maintenance of bipolar cell polarity	0.419061072863332
UV protection	13	GO:0009650	GO:0009650	0.597871868765241	0.110891712052139	BP		0.419061072863332
negative regulation of striated muscle tissue development	48	GO:0045843	GO:0045843	0.550919079716624	0.111234973540828	BP		0.4201249888562
pyrimidine nucleoside monophosphate metabolic process	14	GO:0009129	GO:0009129	0.594092793914382	0.111436695307155	BP		0.420653437748472
positive regulation of autophagy of mitochondrion in response to mitochondrial depolarization	13	GO:1904925	GO:1904925	0.597518235846766	0.111728915098545	BP		0.421522725144511
positive regulation of glucose metabolic process	37	GO:0010907	GO:0010907	0.557644654964243	0.11255618049942	BP		0.424408512176761
integral component of mitochondrial membrane	62	GO:0032592	GO:0032592	0.544537227250014	0.112723180383823	CC		0.42480286029474
plasma lipoprotein particle assembly	26	GO:0034377	GO:0034377	0.568642263580798	0.112886728111407	BP		0.42518376952199
negative regulation of histone methylation	19	GO:0031061	GO:0031061	0.580211855833984	0.11307908573444	BP		0.425672708799004
regulation of mRNA polyadenylation	15	GO:1900363	GO:1900363	0.590200384298655	0.113241041965933	BP		0.425961188645081
retrograde transport, endosome to plasma membrane	25	GO:1990126	GO:1990126	0.56988051091883	0.113280892072818	BP		0.425961188645081
determination of bilateral symmetry	123	GO:0009855	GO:0009855	0.531577698935175	0.113524065435986	BP		0.426639861599844
negative regulation of G protein-coupled receptor signaling pathway	49	GO:0045744	GO:0045744	0.549872115581685	0.113669233287141	BP		0.426949669841214
negative regulation of hormone metabolic process	11	GO:0032351	GO:0032351	0.605060622692346	0.113808086090268	BP		0.427123999404519
regulation of autophagy of mitochondrion in response to mitochondrial depolarization	14	GO:1904923	GO:1904923	0.593122310339081	0.113841159994093	BP		0.427123999404519
nucleus localization	19	GO:0051647	GO:0051647	0.57991560449724	0.113938738717808	BP		0.42724988181589
adherens junction organization	134	GO:0034332	GO:0034332	0.530203407648673	0.114000262324075	BP		0.42724988181589
cellular metabolic compound salvage	33	GO:0043094	GO:0043094	0.560593567945499	0.114223281594691	BP		0.427850112566577
mismatched DNA binding	10	GO:0030983	GO:0030983	0.609782534129107	0.114659225933034	MF		0.429246805115637
regulation of lamellipodium assembly	28	GO:0010591	GO:0010591	0.565560821484992	0.1149663664595	BP		0.430160027555446
skeletal muscle tissue development	154	GO:0007519	GO:0007519	0.528053945638647	0.11515518559785	BP		0.430390496859727
regulation of cardiac muscle hypertrophy	56	GO:0010611	GO:0010611	0.546362702399796	0.115168270978972	BP		0.430390496859727
regulation of protein autophosphorylation	40	GO:0031952	GO:0031952	0.554815425861002	0.115217673417341	BP		0.430390496859727
purine nucleoside metabolic process	66	GO:0042278	GO:0042278	0.542681132654275	0.115385066838664	BP		0.430779355405348
regulation of cilium beat frequency	10	GO:0003356	GO:0003356	0.609357206558277	0.115563873136362	BP		0.431210373117369
purine nucleoside biosynthetic process	20	GO:0042451	GO:0042451	0.577325461659916	0.115647081090214	BP	purine ribonucleoside biosynthetic process	0.431284402136983
antigen processing and presentation of peptide antigen	185	GO:0048002	GO:0048002	0.525555759898212	0.115770670327644	BP		0.431508862130308
chaperone-mediated autophagy	16	GO:0061684	GO:0061684	0.58624150710315	0.116185953058946	BP		0.432781056796334
thiol-dependent ubiquitin-specific protease activity	71	GO:0004843	GO:0004843	0.540997015435129	0.116299117880109	MF		0.432781056796334
mitochondrial outer membrane permeabilization involved in programmed cell death	56	GO:1902686	GO:1902686	0.546137813738117	0.116302755345356	BP		0.432781056796334
androgen receptor signaling pathway	58	GO:0030521	GO:0030521	0.545306533188083	0.116467336243185	BP		0.433156661459627
regulation of histone phosphorylation	13	GO:0033127	GO:0033127	0.595406994542441	0.116821277687645	BP		0.434235726893562
regulation of lymphocyte migration	60	GO:2000401	GO:2000401	0.54445285789679	0.116967487219046	BP		0.434409197342041
intraciliary transport particle	23	GO:0030990	GO:0030990	0.57169853002639	0.116995600753447	CC		0.434409197342041
male germ cell nucleus	14	GO:0001673	GO:0001673	0.591720500730313	0.117379191943171	CC		0.435595845346358
tRNA threonylcarbamoyladenosine metabolic process	11	GO:0070525	GO:0070525	0.603389132821076	0.117549483326713	BP		0.43599007276382
synaptic vesicle fusion to presynaptic active zone membrane	10	GO:0031629	GO:0031629	0.608245866776429	0.117951531014895	BP		0.436910266278767
transcription corepressor binding	12	GO:0001222	GO:0001222	0.598810748999428	0.117975860015942	MF		0.436910266278767
interferon-gamma-mediated signaling pathway	88	GO:0060333	GO:0060333	0.536580892726144	0.11799016594481	BP		0.436910266278767
eukaryotic translation initiation factor 3 complex	15	GO:0005852	GO:0005852	0.588329215847745	0.118131326438356	CC		0.437195110244401
exoribonuclease activity	33	GO:0004532	GO:0004532	0.559567087669328	0.118213019772325	MF		0.437259680744806
polarized epithelial cell differentiation	19	GO:0030859	GO:0030859	0.578358478568745	0.118533729299049	BP		0.438161977598151
hindlimb morphogenesis	35	GO:0035137	GO:0035137	0.557749548417498	0.118596455102167	BP		0.438161977598151
tricarboxylic acid cycle	27	GO:0006099	GO:0006099	0.565700040700041	0.118713514898416	BP		0.438161977598151
response to muramyl dipeptide	19	GO:0032495	GO:0032495	0.57826454521807	0.118815050634773	BP		0.438161977598151
positive regulation of protein processing	26	GO:0010954	GO:0010954	0.56691742431046	0.118825253691845	BP		0.438161977598151
response to exogenous dsRNA	31	GO:0043330	GO:0043330	0.56128943612655	0.118843228129031	BP		0.438161977598151
placenta development	149	GO:0001890	GO:0001890	0.528050046902702	0.119006923883961	BP		0.438357763708002
regulation of muscle cell apoptotic process	66	GO:0010660	GO:0010660	0.542021690634045	0.119027611458688	BP		0.438357763708002
positive regulation of peptide hormone secretion	91	GO:0090277	GO:0090277	0.535808286636101	0.119089554084058	BP		0.438357763708002
lymphocyte chemotaxis	40	GO:0048247	GO:0048247	0.553873650924589	0.119271986056926	BP		0.438791966001859
lens fiber cell development	12	GO:0070307	GO:0070307	0.598176100628931	0.119487255408763	BP		0.439133787178805
axon initial segment	15	GO:0043194	GO:0043194	0.587798517705188	0.119545096404783	CC		0.439133787178805
core promoter binding	41	GO:0001047	GO:0001047	0.553136726884937	0.119615087931226	MF		0.439133787178805
establishment or maintenance of epithelial cell apical/basal polarity	30	GO:0045197	GO:0045197	0.562093838016075	0.119622985810976	BP		0.439133787178805
negative regulation of protein catabolic process	124	GO:0042177	GO:0042177	0.530623191993808	0.119758504946245	BP		0.439394277446977
chondroitin sulfate proteoglycan biosynthetic process	29	GO:0050650	GO:0050650	0.562887569815861	0.120613900365274	BP		0.442294291964469
regulation of histone deacetylation	27	GO:0031063	GO:0031063	0.564954721204721	0.121395413581518	BP		0.444920401096291
synaptic vesicle transport	126	GO:0048489	GO:0048489	0.53013085002574	0.121706246626522	BP	establishment of synaptic vesicle localization	0.445683783863095
chylomicron assembly	10	GO:0034378	GO:0034378	0.606517116004665	0.121734668557375	BP		0.445683783863095
synapsis	40	GO:0007129	GO:0007129	0.55325324809239	0.121997210491004	BP		0.446343700963144
activation of protein kinase A activity	17	GO:0034199	GO:0034199	0.581606039807824	0.122046081030328	BP		0.446343700963144
positive regulation of intrinsic apoptotic signaling pathway	59	GO:2001244	GO:2001244	0.543810199357874	0.122354236454893	BP		0.447230361606876
regulation of cardiocyte differentiation	49	GO:1905207	GO:1905207	0.548014913765754	0.122559701435322	BP		0.447701578999123
positive regulation of lamellipodium assembly	20	GO:0010592	GO:0010592	0.575063499691083	0.12261471396626	BP		0.447701578999123
regulation of embryonic development	123	GO:0045995	GO:0045995	0.530311308367508	0.123115662239498	BP		0.449063499140682
regulation of double-strand break repair via homologous recombination	41	GO:0010569	GO:0010569	0.552352000214626	0.123119672259258	BP		0.449063499140682
positive regulation of leukocyte chemotaxis	81	GO:0002690	GO:0002690	0.537280444192527	0.12322712614735	BP		0.449192649132872
NAD+ kinase activity	17	GO:0003951	GO:0003951	0.581178085510113	0.123287080308581	MF		0.449192649132872
RNA phosphodiester bond hydrolysis, exonucleolytic	33	GO:0090503	GO:0090503	0.558211633998359	0.123630974672111	BP		0.450200706819481
mitophagy	21	GO:0000423	GO:0000423	0.572919322884996	0.12370580109214	BP		0.450200706819481
thioesterase binding	11	GO:0031996	GO:0031996	0.600694790939028	0.12376219842187	MF		0.450200706819481
regulation of granulocyte chemotaxis	43	GO:0071622	GO:0071622	0.550931255916289	0.124010096674652	BP		0.45079991491668
PERK-mediated unfolded protein response	21	GO:0036499	GO:0036499	0.57278855521338	0.124130216403755	BP		0.45079991491668
asymmetric cell division	20	GO:0008356	GO:0008356	0.574565799409625	0.124186533843247	BP		0.45079991491668
clathrin-dependent endocytosis	36	GO:0072583	GO:0072583	0.555584190471827	0.124289066714975	BP		0.45079991491668
tricarboxylic acid metabolic process	33	GO:0072350	GO:0072350	0.558045065190867	0.124308583722294	BP		0.45079991491668
NAD binding	50	GO:0051287	GO:0051287	0.547180298548531	0.124324337393272	MF		0.45079991491668
rhodopsin mediated signaling pathway	30	GO:0016056	GO:0016056	0.560669551876531	0.125096985058359	BP		0.453360000163572
negative regulation of necroptotic process	11	GO:0060546	GO:0060546	0.599890230515917	0.12566117190473	BP		0.45497841134152
protein disulfide oxidoreductase activity	21	GO:0015035	GO:0015035	0.572314522403771	0.125677257320314	MF		0.45497841134152
exoribonuclease activity, producing 5'-phosphomonoesters	31	GO:0016896	GO:0016896	0.559467772961377	0.125961134025483	MF		0.455480181378232
positive regulation of protein targeting to membrane	30	GO:0090314	GO:0090314	0.560419958324746	0.126073989157411	BP		0.455480181378232
SUMO transferase activity	18	GO:0019789	GO:0019789	0.577966153400294	0.126086083286004	MF		0.455480181378232
somatic recombination of immunoglobulin gene segments	49	GO:0016447	GO:0016447	0.547291966724783	0.126149051146125	BP		0.455480181378232
negative regulation of epithelial cell proliferation	121	GO:0050680	GO:0050680	0.530169345504363	0.12615047632941	BP		0.455480181378232
cellular response to glucocorticoid stimulus	53	GO:0071385	GO:0071385	0.545371815210138	0.126706736846503	BP		0.45724605035912
negative regulation of GTPase activity	47	GO:0034260	GO:0034260	0.548100617518804	0.12705398809233	BP		0.45817032150261
monocarboxylic acid binding	59	GO:0033293	GO:0033293	0.542941041962219	0.127097497354823	MF		0.45817032150261
glucocorticoid metabolic process	24	GO:0008211	GO:0008211	0.567159353613038	0.127407736837966	BP		0.458886015154746
negative regulation of ryanodine-sensitive calcium-release channel activity	11	GO:0060315	GO:0060315	0.599148039117853	0.127430879906328	BP		0.458886015154746
regulation of execution phase of apoptosis	27	GO:1900117	GO:1900117	0.563194444444444	0.127897745160924	BP		0.460323666613033
nucleoside salvage	16	GO:0043174	GO:0043174	0.581896403815798	0.12837656243072	BP		0.461802792760826
glycolytic process through fructose-6-phosphate	28	GO:0061615	GO:0061615	0.561822338661407	0.128801918945661	BP	glycolytic process through glucose-6-phosphate	0.463088145982127
negative regulation of cell junction assembly	23	GO:1901889	GO:1901889	0.56814599429206	0.128991805986496	BP		0.463320590980004
positive regulation of cellular response to insulin stimulus	22	GO:1900078	GO:1900078	0.569672003245639	0.129002721114768	BP		0.463320590980004
activation of JUN kinase activity	35	GO:0007257	GO:0007257	0.55524228382942	0.129088155314866	BP		0.463382903519504
positive regulation of cartilage development	31	GO:0061036	GO:0061036	0.558625641571151	0.129350184074221	BP		0.464078731053847
negative regulation of muscle cell apoptotic process	37	GO:0010656	GO:0010656	0.553595244729265	0.129695754020847	BP		0.465073394028391
positive regulation of membrane permeability	60	GO:1905710	GO:1905710	0.542100915536587	0.129806484596124	BP		0.465225347109646
positive regulation of epithelial cell migration	140	GO:0010634	GO:0010634	0.527614235283648	0.130007949436669	BP		0.465630595822488
DNA N-glycosylase activity	13	GO:0019104	GO:0019104	0.590208062830541	0.130056385932787	MF		0.465630595822488
regulation of hair cycle	28	GO:0042634	GO:0042634	0.561478908480763	0.130128508653623	BP		0.465643864298926
negative regulation of type I interferon-mediated signaling pathway	11	GO:0060339	GO:0060339	0.597919369324419	0.130398517578716	BP		0.46636485057317
positive regulation of lamellipodium organization	28	GO:1902745	GO:1902745	0.561351348699381	0.13062364184333	BP		0.466924635706778
protein methyltransferase activity	80	GO:0008276	GO:0008276	0.536321258702695	0.130882105233558	MF		0.467602943947295
dioxygenase activity	85	GO:0051213	GO:0051213	0.535195956744303	0.13119979350417	MF		0.468492022344901
regulation of mitochondrial membrane permeability	69	GO:0046902	GO:0046902	0.539020027112769	0.131337827428144	BP		0.468549733707558
vitamin catabolic process	12	GO:0009111	GO:0009111	0.593379073756432	0.131353642655601	BP		0.468549733707558
anterograde synaptic vesicle transport	18	GO:0048490	GO:0048490	0.576158662609346	0.131667783949138	BP	synaptic vesicle cytoskeletal transport, synaptic vesicle transport along microtubule	0.469424273209971
positive regulation of ATP metabolic process	38	GO:1903580	GO:1903580	0.552391012585419	0.131943697334342	BP		0.47010539787392
mitotic cell cycle arrest	13	GO:0071850	GO:0071850	0.589469128374028	0.132018592128346	BP		0.47010539787392
type B pancreatic cell proliferation	22	GO:0044342	GO:0044342	0.568782573416971	0.132066047713038	BP		0.47010539787392
3'-5' exonuclease activity	44	GO:0008408	GO:0008408	0.548600388815613	0.132423021565089	MF		0.470976348272499
proton-transporting two-sector ATPase complex assembly	10	GO:0070071	GO:0070071	0.601804212114976	0.132478533264995	BP		0.470976348272499
negative regulation of translational initiation	18	GO:0045947	GO:0045947	0.575887920317874	0.132518323088721	BP		0.470976348272499
ubiquitin binding	54	GO:0043130	GO:0043130	0.543826183577095	0.132744463412289	MF		0.471420661880299
adenylyltransferase activity	26	GO:0070566	GO:0070566	0.563090024459436	0.132781870235753	MF		0.471420661880299
CoA-ligase activity	26	GO:0016405	GO:0016405	0.563023989265319	0.133032183599958	MF		0.472063108228004
positive regulation of mitochondrial membrane permeability involved in apoptotic process	54	GO:1902110	GO:1902110	0.543615934106542	0.133894363315948	BP		0.474874954001221
pyrimidine-containing compound metabolic process	94	GO:0072527	GO:0072527	0.53307686322524	0.134087622594522	BP		0.475312687176207
striated muscle adaptation	44	GO:0014888	GO:0014888	0.548186256430773	0.134469576835003	BP		0.476306052281514
regulation of neuron migration	38	GO:2001222	GO:2001222	0.551823058918862	0.134549860651036	BP		0.476306052281514
negative regulation of calcineurin-NFAT signaling cascade	14	GO:0070885	GO:0070885	0.585299624550294	0.134577804663143	BP	negative regulation of calcineurin-mediated signaling	0.476306052281514
regulation of cardiac muscle tissue development	79	GO:0055024	GO:0055024	0.535969678885155	0.134701582638933	BP		0.476496346902586
signal transduction involved in G2 DNA damage checkpoint	13	GO:0072425	GO:0072425	0.5883818391023	0.134942799724011	BP		0.477003078911739
regulation of calcium ion transmembrane transporter activity	82	GO:1901019	GO:1901019	0.535267065183578	0.134987570380657	BP		0.477003078911739
positive regulation of JNK cascade	122	GO:0046330	GO:0046330	0.528944937752517	0.135055088607541	BP		0.477003078911739
postsynaptic modulation of chemical synaptic transmission	16	GO:0099170	GO:0099170	0.579610184613273	0.135135554153542	BP		0.477039720730814
beta-catenin destruction complex	11	GO:0030877	GO:0030877	0.595911086717892	0.135351435710903	CC		0.477554106505137
nuclear-transcribed mRNA catabolic process, exonucleolytic	34	GO:0000291	GO:0000291	0.554541008322521	0.135593834533801	BP		0.478161470381891
3'-UTR-mediated mRNA stabilization	15	GO:0070935	GO:0070935	0.581956263153079	0.135900429438043	BP		0.478994470613837
regulation of glial cell apoptotic process	10	GO:0034350	GO:0034350	0.600315565617068	0.136004016592543	BP		0.479111458037706
oxidoreductase activity, acting on paired donors, with incorporation or reduction of molecular oxygen, NAD(P)H as one donor, and incorporation of one atom of oxygen	33	GO:0016709	GO:0016709	0.555221723903873	0.136190382909116	MF		0.479519785866241
serine phosphorylation of STAT protein	11	GO:0042501	GO:0042501	0.595393423809999	0.136648753600082	BP		0.480884910549203
negative regulation of canonical Wnt signaling pathway	164	GO:0090090	GO:0090090	0.524816815283177	0.13682973203091	BP		0.481272948941793
citrate metabolic process	29	GO:0006101	GO:0006101	0.558718751628445	0.13692593227696	BP		0.481362549110014
vinculin binding	11	GO:0017166	GO:0017166	0.595200079832352	0.137135467770292	MF		0.481850280663195
protein kinase A regulatory subunit binding	17	GO:0034237	GO:0034237	0.576571520852679	0.137206489098619	MF		0.48185106543096
regulation of protein targeting	81	GO:1903533	GO:1903533	0.535096588384883	0.137612135364197	BP		0.483026401902386
response to amino acid starvation	46	GO:1990928	GO:1990928	0.54647428709825	0.137830009708874	BP		0.483541776329173
positive regulation of striated muscle contraction	14	GO:0045989	GO:0045989	0.584113477958259	0.137935244622258	BP		0.48366165631071
positive regulation of intracellular steroid hormone receptor signaling pathway	17	GO:0033145	GO:0033145	0.576296984133393	0.138068658791508	BP		0.483880170821319
P-body	63	GO:0000932	GO:0000932	0.539669425100436	0.138227233765827	CC		0.484186594446846
telomeric DNA binding	34	GO:0042162	GO:0042162	0.553896305997146	0.138446628039867	MF		0.484317921001701
thiol-dependent ubiquitinyl hydrolase activity	85	GO:0036459	GO:0036459	0.534142957969286	0.138472722644854	MF		0.484317921001701
phospholipase inhibitor activity	10	GO:0004859	GO:0004859	0.599286547300542	0.138478206621997	MF		0.484317921001701
fatty acid beta-oxidation using acyl-CoA oxidase	15	GO:0033540	GO:0033540	0.580963491627779	0.138825189277353	BP		0.485282094618215
positive regulation of cell migration involved in sprouting angiogenesis	21	GO:0090050	GO:0090050	0.56827053215904	0.139422486543892	BP		0.487119837483433
regulation of rRNA processing	12	GO:2000232	GO:2000232	0.590240137221269	0.139545243011328	BP		0.487298575646537
negative regulation of tissue remodeling	19	GO:0034104	GO:0034104	0.571703661955548	0.139641404739844	BP		0.487384308030452
positive regulation of protein ubiquitination	109	GO:0031398	GO:0031398	0.530010734413872	0.13978952952239	BP		0.487651223951504
muscle cell development	145	GO:0055001	GO:0055001	0.526034220114704	0.139956341234206	BP		0.487902549910775
cellular response to glucose starvation	38	GO:0042149	GO:0042149	0.550658211271529	0.140004948571223	BP		0.487902549910775
mitochondrial outer membrane permeabilization	52	GO:0097345	GO:0097345	0.543309253525972	0.140097532111678	BP		0.487975334468823
cellular response to exogenous dsRNA	17	GO:0071360	GO:0071360	0.575570269288223	0.140368677645824	BP		0.488332148889848
maintenance of synapse structure	14	GO:0099558	GO:0099558	0.583255727323524	0.140398456010153	BP		0.488332148889848
STAGA complex	12	GO:0030914	GO:0030914	0.589914236706689	0.140415224122455	CC		0.488332148889848
male meiosis I	23	GO:0007141	GO:0007141	0.564912888241405	0.140628106228427	BP		0.488822722671437
positive regulation of glycogen metabolic process	17	GO:0070875	GO:0070875	0.575344180225282	0.141089515331287	BP		0.490076398853817
core promoter sequence-specific DNA binding	31	GO:0001046	GO:0001046	0.555811149819607	0.141132786034893	MF		0.490076398853817
modulation of transcription in other organism involved in symbiotic interaction	28	GO:0052312	GO:0052312	0.558672593290355	0.14132297364807	BP		0.490486567388458
positive regulation of monocyte chemotaxis	18	GO:0090026	GO:0090026	0.573050846164993	0.141658802182141	BP		0.491401532951913
ventricular cardiac muscle tissue morphogenesis	48	GO:0055010	GO:0055010	0.544713070591742	0.142018907599403	BP		0.492197658462221
mRNA cleavage	17	GO:0006379	GO:0006379	0.575049456982519	0.142032941701411	BP		0.492197658462221
response to glucose	184	GO:0009749	GO:0009749	0.522920572103034	0.142272925828671	BP		0.49274174087395
regulation of protein localization to nucleus	116	GO:1900180	GO:1900180	0.52879063716017	0.142346241705102	BP		0.49274174087395
positive regulation of protein targeting to mitochondrion	32	GO:1903955	GO:1903955	0.554644022672621	0.142407141389812	BP		0.49274174087395
pre-mRNA binding	27	GO:0036002	GO:0036002	0.559394078144078	0.142750323130294	MF		0.493270627194481
regulation of high voltage-gated calcium channel activity	15	GO:1901841	GO:1901841	0.579645896239363	0.142772661076054	BP		0.493270627194481
purine deoxyribonucleotide metabolic process	11	GO:0009151	GO:0009151	0.592992216345674	0.142777422211744	BP		0.493270627194481
endocytic recycling	42	GO:0032456	GO:0032456	0.547604315015797	0.142958910379803	BP		0.493647054309964
activation of JNKK activity	11	GO:0007256	GO:0007256	0.592536922462828	0.14396011844387	BP		0.496397552296369
labyrinthine layer morphogenesis	20	GO:0060713	GO:0060713	0.568641449852406	0.143982480733617	BP		0.496397552296369
fascia adherens	10	GO:0005916	GO:0005916	0.597029567126295	0.144011802597371	CC		0.496397552296369
regulation of release of cytochrome c from mitochondria	46	GO:0090199	GO:0090199	0.545288733805163	0.144047188625526	BP		0.496397552296369
ubiquitinyl hydrolase activity	86	GO:0101005	GO:0101005	0.533077911226652	0.144701166955605	MF		0.498398857439194
mitotic nuclear envelope reassembly	10	GO:0007084	GO:0007084	0.596720861631337	0.144780113116234	BP		0.498418538122959
retromer complex	21	GO:0030904	GO:0030904	0.56674381959292	0.144868184384851	CC		0.498469597028967
regulation of heart growth	63	GO:0060420	GO:0060420	0.538563428676345	0.145033297206349	BP		0.498694883227629
glutathione derivative metabolic process	21	GO:1901685	GO:1901685	0.566678435757112	0.145104560057268	BP	glutathione derivative biosynthetic process	0.498694883227629
regulation of establishment of protein localization to chromosome	12	GO:0070202	GO:0070202	0.588141795311607	0.145211102890753	BP		0.498694883227629
left/right axis specification	12	GO:0070986	GO:0070986	0.588136077758719	0.14522674971454	BP		0.498694883227629
regulation of hematopoietic stem cell differentiation	72	GO:1902036	GO:1902036	0.536020208979217	0.14545963718883	BP		0.499088735704015
negative regulation of lipase activity	15	GO:0060192	GO:0060192	0.57875377436179	0.145488106323357	BP		0.499088735704015
negative regulation of lipopolysaccharide-mediated signaling pathway	13	GO:0031665	GO:0031665	0.584476042689299	0.145811912222633	BP		0.499947543872666
telomere maintenance in response to DNA damage	11	GO:0043247	GO:0043247	0.591676229917174	0.146213907838732	BP		0.501073442472511
phosphatidylinositol phosphate kinase activity	11	GO:0016307	GO:0016307	0.591557728769584	0.146526058112607	MF		0.501890463771719
mononuclear cell migration	66	GO:0071674	GO:0071674	0.537394118862337	0.146875217615466	BP		0.50283336573987
retinoic acid receptor signaling pathway	28	GO:0048384	GO:0048384	0.557308684858654	0.146992792774527	BP		0.502982879649788
regulation of macroautophagy	166	GO:0016241	GO:0016241	0.523617666004146	0.147310224921245	BP		0.503815774278388
interleukin-1-mediated signaling pathway	99	GO:0070498	GO:0070498	0.530459202739711	0.147726897256557	BP		0.504987073193435
heart field specification	14	GO:0003128	GO:0003128	0.580721686876905	0.147849124463565	BP		0.505151175250515
granulocyte chemotaxis	83	GO:0071621	GO:0071621	0.533210614105623	0.147994318590846	BP		0.505170055936842
steroid hormone receptor binding	88	GO:0035258	GO:0035258	0.532257710563111	0.148003098962395	MF		0.505170055936842
positive regulation of centrosome cycle	10	GO:0046607	GO:0046607	0.595348837209302	0.148228179886145	BP		0.505684707922359
regulation of transcription by RNA polymerase III	23	GO:0006359	GO:0006359	0.56284704393203	0.148425634125497	BP		0.506104642213494
platelet alpha granule lumen	67	GO:0031093	GO:0031093	0.536850869618848	0.148601600331332	CC		0.50645092231099
ERBB signaling pathway	135	GO:0038127	GO:0038127	0.526009984520917	0.148710454709626	BP		0.506568245622481
monocyte chemotaxis	42	GO:0002548	GO:0002548	0.546438802403051	0.148939508988802	BP		0.50709469643711
[truncated: 4,807 more rows]
